# Supplementary material for: Parallel Synthesis of a Library of Symmetrically- and Dissymmetrically-disubstituted Imidazole-4,5-dicarboxamides Bearing Amino Acid Esters
Source: PubMed Central journal article supplement (PMC2635021; doi:10.3390/molecules14010352), 2009-01-13
Supplement: NIHMS89539-supplement-SupportingInfo.pdf [file NIHMS89539-supplement-SupportingInfo.pdf]

Parallel Synthesis of a Library of Symmetrically- and Dissymmetrically-disubstituted  
Imidazole-4,5-dicarboxamides Bearing Amino Acid Esters

*Rosanna Solinas, John C. DiCesare, and Paul W. Baures\**

Department of Chemistry and Biochemistry, The University of Tulsa, 800 South Tucker Drive, Tulsa, OK

74104

**Supporting Information**

**Table of Contents**

|            |                                                                                            |           |                                                                             |
|------------|--------------------------------------------------------------------------------------------|-----------|-----------------------------------------------------------------------------|
| Page S1-2. | Title Page and Table of Contents                                                           | Page S26. | <b>Figure S22.</b> LC/MS data for <b>4{22}</b> .                            |
| Page S3.   | <b>Table S1.</b> Symmetrically-disubstituted Amino Acid Ester I45DCs, <b>4{1-9}</b> .      | Page S27. | <b>Figure S23.</b> LC/MS data for <b>4{23}</b> .                            |
| Page S4.   | <b>Table S2.</b> Dissymmetrically-disubstituted Amino Acid Ester I45DCs, <b>4{10-45}</b> . | Page S28. | <b>Figure S24.</b> LC/MS data for <b>4{24}</b> .                            |
| Page S5.   | <b>Figure S1.</b> LC/MS data for <b>4{1}</b> .                                             | Page S29. | <b>Figure S25.</b> LC/MS data for <b>4{25}</b> .                            |
| Page S6.   | <b>Figure S2.</b> LC/MS data for <b>4{2}</b> .                                             | Page S30. | <b>Figure S26.</b> LC/MS data for <b>4{26}</b> .                            |
| Page S7.   | <b>Figure S3.</b> LC/MS data for <b>4{3}</b> .                                             | Page S31. | <b>Figure S27.</b> LC/MS data for <b>4{27}</b> .                            |
| Page S8.   | <b>Figure S4.</b> LC/MS data for <b>4{4}</b> .                                             | Page S32. | <b>Figure S28.</b> LC/MS data for <b>4{28}</b> .                            |
| Page S9.   | <b>Figure S5.</b> LC/MS data for <b>4{5}</b> .                                             | Page S33. | <b>Figure S29.</b> LC/MS data for <b>4{29}</b> .                            |
| Page S10.  | <b>Figure S6.</b> LC/MS data for <b>4{6}</b> .                                             | Page S34. | <b>Figure S30.</b> LC/MS data for <b>4{30}</b> .                            |
| Page S11.  | <b>Figure S7.</b> LC/MS data for <b>4{7}</b> .                                             | Page S35. | <b>Figure S31.</b> LC/MS data for <b>4{31}</b> .                            |
| Page S12.  | <b>Figure S8.</b> LC/MS data for <b>4{8}</b> .                                             | Page S36. | <b>Figure S32.</b> LC/MS data for <b>4{32}</b> .                            |
| Page S13.  | <b>Figure S9.</b> LC/MS data for <b>4{9}</b> .                                             | Page S37. | <b>Figure S33.</b> LC/MS data for <b>4{33}</b> .                            |
| Page S14.  | <b>Figure S10.</b> LC/MS data for <b>4{10}</b> .                                           | Page S38. | <b>Figure S34.</b> LC/MS data for <b>4{34}</b> .                            |
| Page S15.  | <b>Figure S11.</b> LC/MS data for <b>4{11}</b> .                                           | Page S39. | <b>Figure S35.</b> LC/MS data for <b>4{35}</b> .                            |
| Page S16.  | <b>Figure S12.</b> LC/MS data for <b>4{12}</b> .                                           | Page S40. | <b>Figure S36.</b> LC/MS data for <b>4{36}</b> .                            |
| Page S17.  | <b>Figure S13.</b> LC/MS data for <b>4{13}</b> .                                           | Page S41. | <b>Figure S37.</b> LC/MS data for <b>4{37}</b> .                            |
| Page S18.  | <b>Figure S14.</b> LC/MS data for <b>4{14}</b> .                                           | Page S42. | <b>Figure S38.</b> LC/MS data for <b>4{38}</b> .                            |
| Page S19.  | <b>Figure S15.</b> LC/MS data for <b>4{15}</b> .                                           | Page S43. | <b>Figure S39.</b> LC/MS data for <b>4{39}</b> .                            |
| Page S20.  | <b>Figure S16.</b> LC/MS data for <b>4{16}</b> .                                           | Page S44. | <b>Figure S40.</b> LC/MS data for <b>4{40}</b> .                            |
| Page S21.  | <b>Figure S17.</b> LC/MS data for <b>4{17}</b> .                                           | Page S45. | <b>Figure S41.</b> LC/MS data for <b>4{41}</b> .                            |
| Page S22.  | <b>Figure S18.</b> LC/MS data for <b>4{18}</b> .                                           | Page S46. | <b>Figure S42.</b> LC/MS data for <b>4{42}</b> .                            |
| Page S23.  | <b>Figure S19.</b> LC/MS data for <b>4{19}</b> .                                           | Page S47. | <b>Figure S43.</b> LC/MS data for <b>4{43}</b> .                            |
| Page S24.  | <b>Figure S20.</b> LC/MS data for <b>4{20}</b> .                                           | Page S48. | <b>Figure S44.</b> LC/MS data for <b>4{44}</b> .                            |
| Page S25.  | <b>Figure S21.</b> LC/MS data for <b>4{21}</b> .                                           | Page S49. | <b>Figure S45.</b> LC/MS data for <b>4{45}</b> .                            |
|            |                                                                                            | Page S50. | <b>Figure S46.</b> LC/MS data for the crude reaction to yield <b>4{1}</b> . |
|            |                                                                                            | Page S51. | <b>Figure S47.</b> LC/MS data for the crude reaction to yield <b>4{7}</b> . |

- Page S52. **Figure S48.** LC/MS data for the crude reaction to yield **4{8}**.
- Page S53. **Figure S49.** LC/MS data for the crude reaction to yield **4{16}**.
- Page S54. **Figure S50.** LC/MS data for the crude reaction to yield **4{24}**.
- Page S55. **Figure S51.** LC/MS data for the crude reaction to yield **4{26}**.
- Page S56. **Figure S52.** LC/MS data for the crude reaction to yield **4{30}**.
- Page S57. **Figure S53.** LC/MS data for the crude reaction to yield **4{32}**.
- Page S58. **Figure S54.** LC/MS data for the crude reaction to yield **4{35}**.
- Page S59. **Figure S55.** LC/MS data for the crude reaction to yield **4{40}**.
- Page S60. **Figure S56.**  $^1\text{H-NMR}$  for **4{7}**.
- Page S61. **Figure S57.**  $^1\text{H-NMR}$  for **4{8}**.
- Page S62. **Figure S58.**  $^1\text{H-NMR}$  for **4{14}**.
- Page S63. **Figure S59.**  $^1\text{H-NMR}$  for **4{17}**.
- Page S64. **Figure S60.**  $^1\text{H-NMR}$  for **4{22}**.
- Page S65. **Figure S61.**  $^1\text{H-NMR}$  for **4{23}**.
- Page S66. **Figure S62.**  $^1\text{H-NMR}$  for **4{25}**.
- Page S67. **Figure S63.**  $^1\text{H-NMR}$  for **4{26}**.
- Page S68. **Figure S64.**  $^1\text{H-NMR}$  for **4{30}**.
- Page S69. **Figure S65.**  $^1\text{H-NMR}$  for **4{35}**.
- Page S70. **Figure S66.**  $^1\text{H-NMR}$  for **4{38}**.
- Page S71. **Figure S67.**  $^1\text{H-NMR}$  for **4{39}**.
- Page S72. **Figure S68.**  $^1\text{H-NMR}$  for **4{40}**.
- Page S73. **Figure S69.**  $^1\text{H-NMR}$  for **4{42}**.
- Page S74. **Figure S70.**  $^1\text{H-NMR}$  for **4{43}**.
- Page S75. **Figure S71.**  $^1\text{H-NMR}$  for the crude reaction to yield **4{1}**.
- Page S76. **Figure S72.**  $^1\text{H-NMR}$  for the crude reaction to yield **4{7}**.
- Page S77. **Figure S73.**  $^1\text{H-NMR}$  for the crude reaction to yield **4{8}**.
- Page S78. **Figure S74.**  $^1\text{H-NMR}$  for the crude reaction to yield **4{16}**.
- Page S79. **Figure S75.**  $^1\text{H-NMR}$  for the crude reaction to yield **4{24}**.
- Page S80. **Figure S76.**  $^1\text{H-NMR}$  for the crude reaction to yield **4{26}**.
- Page S81. **Figure S77.**  $^1\text{H-NMR}$  for the crude reaction to yield **4{30}**.
- Page S82. **Figure S78.**  $^1\text{H-NMR}$  for the crude reaction to yield **4{32}**.
- Page S83. **Figure S79.**  $^1\text{H-NMR}$  for the crude reaction to yield **4{35}**.
- Page S84. **Figure S80.**  $^1\text{H-NMR}$  for the crude reaction to yield **4{40}**.

**Table S1.** Symmetrically-disubstituted Amino Acid Ester I45DCs, **4**{1-9}.

| compound     | formula                                                        | MW     | C log <i>P</i> | form       | <i>R<sub>f</sub></i> | <i>R<sub>t</sub></i> (min) |
|--------------|----------------------------------------------------------------|--------|----------------|------------|----------------------|----------------------------|
| <b>4</b> {1} | C <sub>17</sub> H <sub>26</sub> N <sub>4</sub> O <sub>6</sub>  | 382.41 | 0.35           | solid      | 0.79                 | 3.40                       |
| <b>4</b> {2} | C <sub>23</sub> H <sub>22</sub> N <sub>4</sub> O <sub>6</sub>  | 450.44 | 1.30           | solid      | 0.22                 | 4.06                       |
| <b>4</b> {3} | C <sub>19</sub> H <sub>30</sub> N <sub>4</sub> O <sub>6</sub>  | 410.47 | 0.97           | glass film | 0.69                 | 4.91                       |
| <b>4</b> {4} | C <sub>25</sub> H <sub>26</sub> N <sub>4</sub> O <sub>6</sub>  | 478.50 | 1.92           | glass film | 0.12                 | 5.04                       |
| <b>4</b> {5} | C <sub>25</sub> H <sub>42</sub> N <sub>4</sub> O <sub>6</sub>  | 494.62 | 3.89           | glass film | 0.45                 | 8.39                       |
| <b>4</b> {6} | C <sub>31</sub> H <sub>38</sub> N <sub>4</sub> O <sub>6</sub>  | 562.66 | 4.83           | glass film | 0.52                 | 8.11                       |
| <b>4</b> {7} | C <sub>31</sub> H <sub>38</sub> N <sub>4</sub> O <sub>6</sub>  | 562.66 | 3.81           | glass film | 0.62                 | 7.73                       |
| <b>4</b> {8} | C <sub>37</sub> H <sub>34</sub> N <sub>4</sub> O <sub>6</sub>  | 630.69 | 4.76           | solid      | 0.23                 | 7.37                       |
| <b>4</b> {9} | C <sub>35</sub> H <sub>60</sub> N <sub>6</sub> O <sub>10</sub> | 724.44 | 3.86           | glass film | 0.86                 | 7.14                       |

**Table S2.** Dissymmetrically-disubstituted Amino Acid Ester I45DCs, 4{10-45}.

| compound | formula                                                       | MW     | C log <i>P</i> | form       | <i>R</i> <sub>f</sub> | <i>R</i> <sub>t</sub> (min) |
|----------|---------------------------------------------------------------|--------|----------------|------------|-----------------------|-----------------------------|
| 4{10}    | C <sub>20</sub> H <sub>24</sub> N <sub>4</sub> O <sub>6</sub> | 416.43 | 1.17           | glass film | 0.83                  | 3.67                        |
| 4{11}    | C <sub>18</sub> H <sub>28</sub> N <sub>4</sub> O <sub>6</sub> | 396.44 | 0.66           | glass film | 0.86                  | 4.00                        |
| 4{12}    | C <sub>21</sub> H <sub>26</sub> N <sub>4</sub> O <sub>6</sub> | 430.45 | 1.14           | glass film | 0.85                  | 4.31                        |
| 4{13}    | C <sub>21</sub> H <sub>34</sub> N <sub>4</sub> O <sub>6</sub> | 438.52 | 2.12           | glass film | 0.91                  | 5.86                        |
| 4{14}    | C <sub>24</sub> H <sub>32</sub> N <sub>4</sub> O <sub>6</sub> | 472.53 | 2.59           | glass film | 0.83                  | 6.04                        |
| 4{15}    | C <sub>24</sub> H <sub>32</sub> N <sub>4</sub> O <sub>6</sub> | 472.53 | 2.42           | glass film | 0.78                  | 6.00                        |
| 4{16}    | C <sub>27</sub> H <sub>30</sub> N <sub>4</sub> O <sub>6</sub> | 506.55 | 2.90           | glass film | 0.84                  | 6.18                        |
| 4{17}    | C <sub>26</sub> H <sub>43</sub> N <sub>5</sub> O <sub>8</sub> | 553.31 | 2.11           | glass film | 0.61                  | 5.45                        |
| 4{18}    | C <sub>21</sub> H <sub>26</sub> N <sub>4</sub> O <sub>6</sub> | 430.56 | 1.48           | glass film | 0.56                  | 4.36                        |
| 4{19}    | C <sub>24</sub> H <sub>24</sub> N <sub>4</sub> O <sub>6</sub> | 464.47 | 1.61           | solid      | 0.70                  | 4.54                        |
| 4{20}    | C <sub>24</sub> H <sub>32</sub> N <sub>4</sub> O <sub>6</sub> | 472.53 | 2.93           | glass film | 0.69                  | 6.06                        |
| 4{21}    | C <sub>27</sub> H <sub>30</sub> N <sub>4</sub> O <sub>6</sub> | 506.55 | 3.07           | glass film | 0.55                  | 6.06                        |
| 4{22}    | C <sub>27</sub> H <sub>30</sub> N <sub>4</sub> O <sub>6</sub> | 506.55 | 2.56           | glass film | 0.67                  | 5.90                        |
| 4{23}    | C <sub>30</sub> H <sub>28</sub> N <sub>4</sub> O <sub>6</sub> | 540.57 | 3.03           | glass film | 0.64                  | 5.95                        |
| 4{24}    | C <sub>29</sub> H <sub>41</sub> N <sub>5</sub> O <sub>8</sub> | 587.67 | 2.92           | glass film | 0.62                  | 5.93                        |
| 4{25}    | C <sub>22</sub> H <sub>28</sub> N <sub>4</sub> O <sub>6</sub> | 444.48 | 1.45           | glass film | 0.57                  | 5.37                        |
| 4{26}    | C <sub>22</sub> H <sub>36</sub> N <sub>4</sub> O <sub>6</sub> | 452.54 | 2.43           | glass film | 0.37                  | 7.44                        |
| 4{27}    | C <sub>25</sub> H <sub>34</sub> N <sub>4</sub> O <sub>6</sub> | 486.56 | 2.90           | glass film | 0.45                  | 6.66                        |
| 4{28}    | C <sub>25</sub> H <sub>34</sub> N <sub>4</sub> O <sub>6</sub> | 486.56 | 2.73           | glass film | 0.54                  | 6.53                        |
| 4{29}    | C <sub>28</sub> H <sub>32</sub> N <sub>4</sub> O <sub>6</sub> | 520.58 | 3.20           | glass film | 0.56                  | 6.38                        |
| 4{30}    | C <sub>27</sub> H <sub>45</sub> N <sub>5</sub> O <sub>8</sub> | 567.68 | 2.42           | glass film | 0.77                  | 6.13                        |
| 4{31}    | C <sub>25</sub> H <sub>34</sub> N <sub>4</sub> O <sub>6</sub> | 486.56 | 3.24           | glass film | 0.39                  | 6.80                        |
| 4{32}    | C <sub>28</sub> H <sub>32</sub> N <sub>4</sub> O <sub>6</sub> | 520.58 | 3.38           | glass film | 0.40                  | 6.79                        |
| 4{33}    | C <sub>28</sub> H <sub>32</sub> N <sub>4</sub> O <sub>6</sub> | 520.58 | 2.86           | glass film | 0.59                  | 6.38                        |
| 4{34}    | C <sub>31</sub> H <sub>30</sub> N <sub>4</sub> O <sub>6</sub> | 554.59 | 3.34           | glass film | 0.35                  | 6.52                        |
| 4{35}    | C <sub>39</sub> H <sub>43</sub> N <sub>5</sub> O <sub>8</sub> | 601.31 | 2.89           | glass film | 0.63                  | 6.25                        |
| 4{36}    | C <sub>28</sub> H <sub>40</sub> N <sub>4</sub> O <sub>6</sub> | 528.64 | 4.36           | glass film | 0.51                  | 8.31                        |
| 4{37}    | C <sub>28</sub> H <sub>40</sub> N <sub>4</sub> O <sub>6</sub> | 528.64 | 4.19           | glass film | 0.42                  | 7.99                        |
| 4{38}    | C <sub>31</sub> H <sub>38</sub> N <sub>4</sub> O <sub>6</sub> | 562.66 | 4.66           | glass film | 0.39                  | 7.79                        |
| 4{39}    | C <sub>30</sub> H <sub>51</sub> N <sub>5</sub> O <sub>8</sub> | 609.76 | 3.87           | glass film | 0.33                  | 7.48                        |
| 4{40}    | C <sub>31</sub> H <sub>38</sub> N <sub>4</sub> O <sub>6</sub> | 562.66 | 4.32           | glass film | 0.44                  | 7.95                        |
| 4{41}    | C <sub>34</sub> H <sub>36</sub> N <sub>4</sub> O <sub>6</sub> | 596.67 | 4.80           | glass film | 0.47                  | 7.64                        |
| 4{42}    | C <sub>33</sub> H <sub>49</sub> N <sub>5</sub> O <sub>8</sub> | 643.77 | 4.35           | glass film | 0.29                  | 7.39                        |
| 4{43}    | C <sub>34</sub> H <sub>36</sub> N <sub>4</sub> O <sub>6</sub> | 596.67 | 4.28           | glass film | 0.48                  | 7.44                        |
| 4{44}    | C <sub>33</sub> H <sub>49</sub> N <sub>5</sub> O <sub>8</sub> | 643.77 | 4.17           | glass film | 0.59                  | 7.29                        |
| 4{45}    | C <sub>36</sub> H <sub>47</sub> N <sub>5</sub> O <sub>8</sub> | 677.34 | 4.65           | glass film | 0.56                  | 7.29                        |



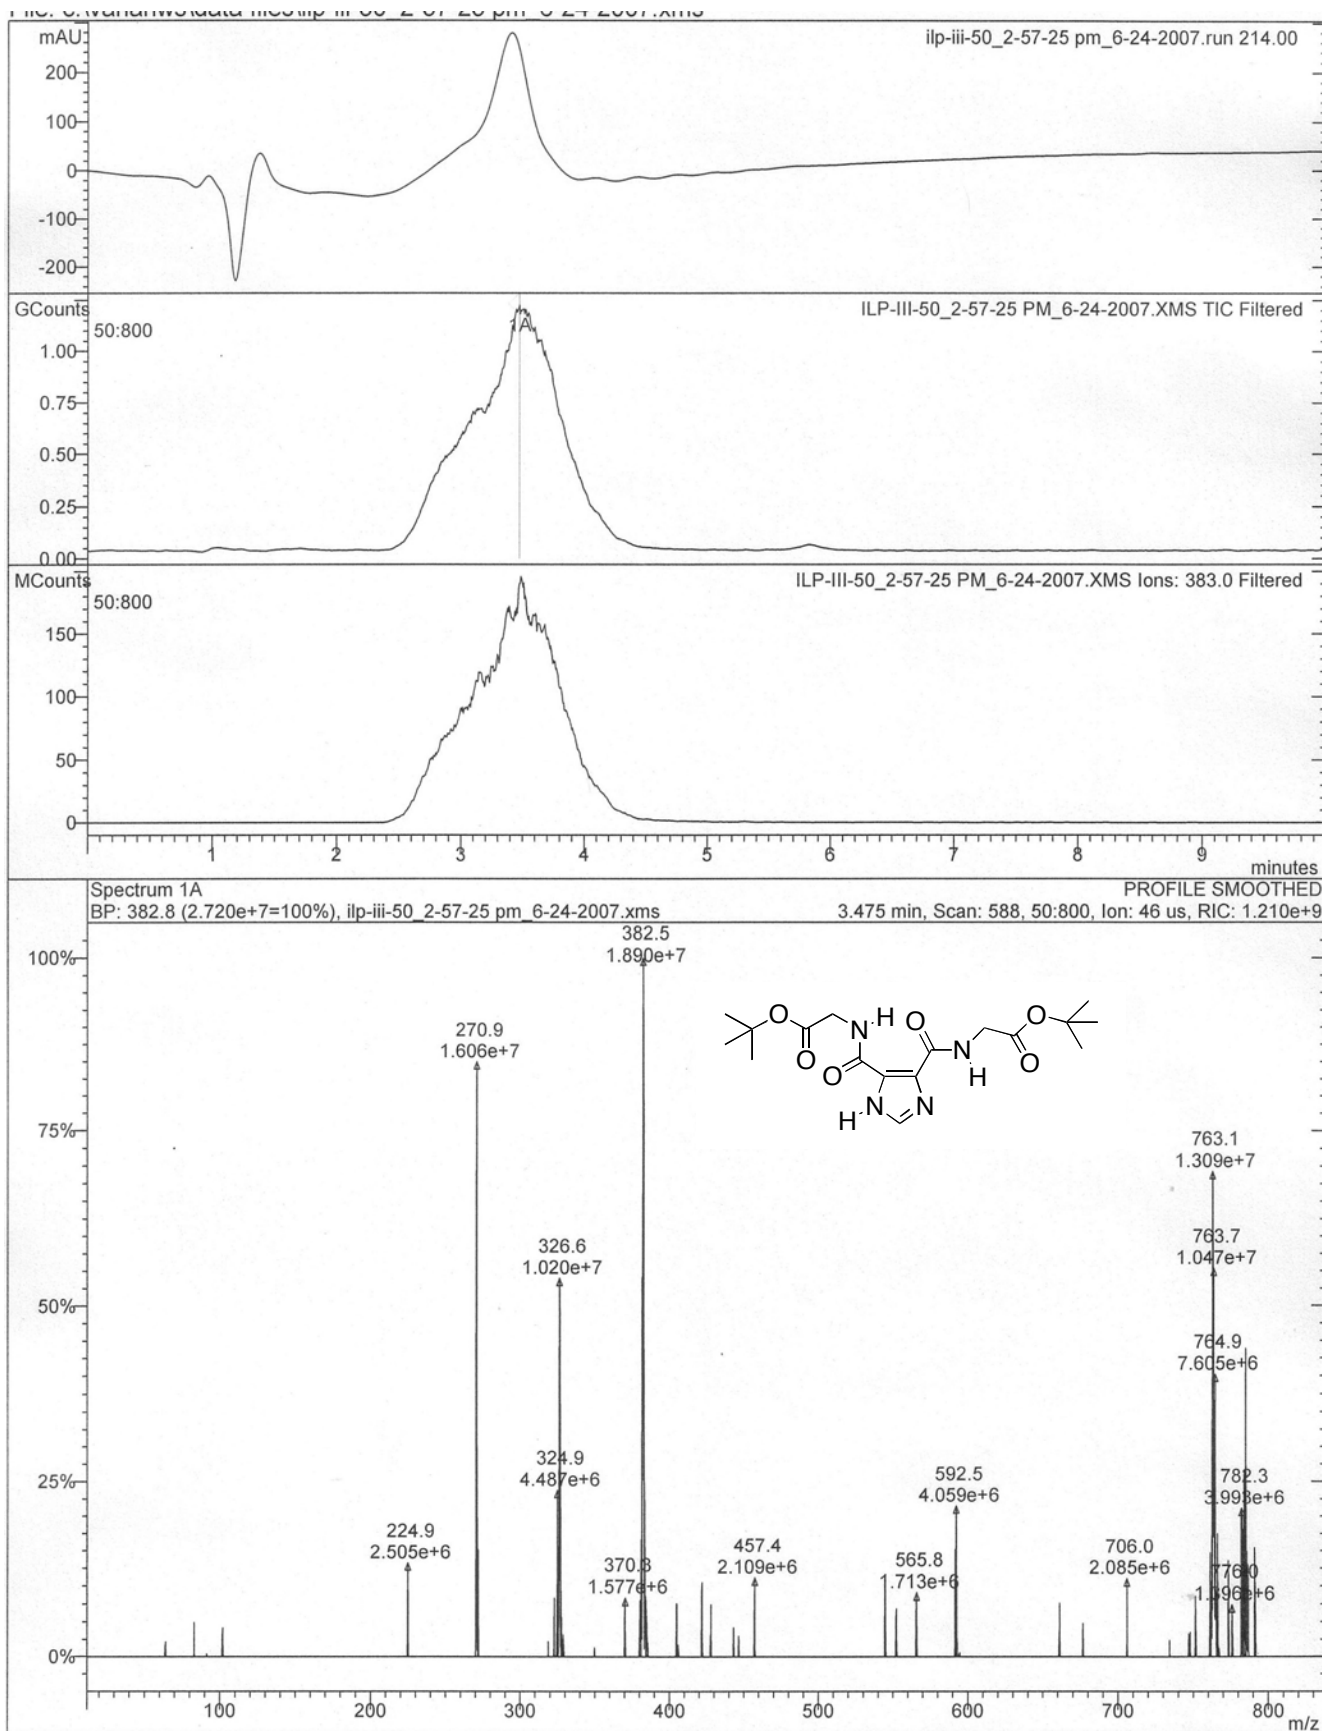

Figure S1. LC/MS data for 4{1}.

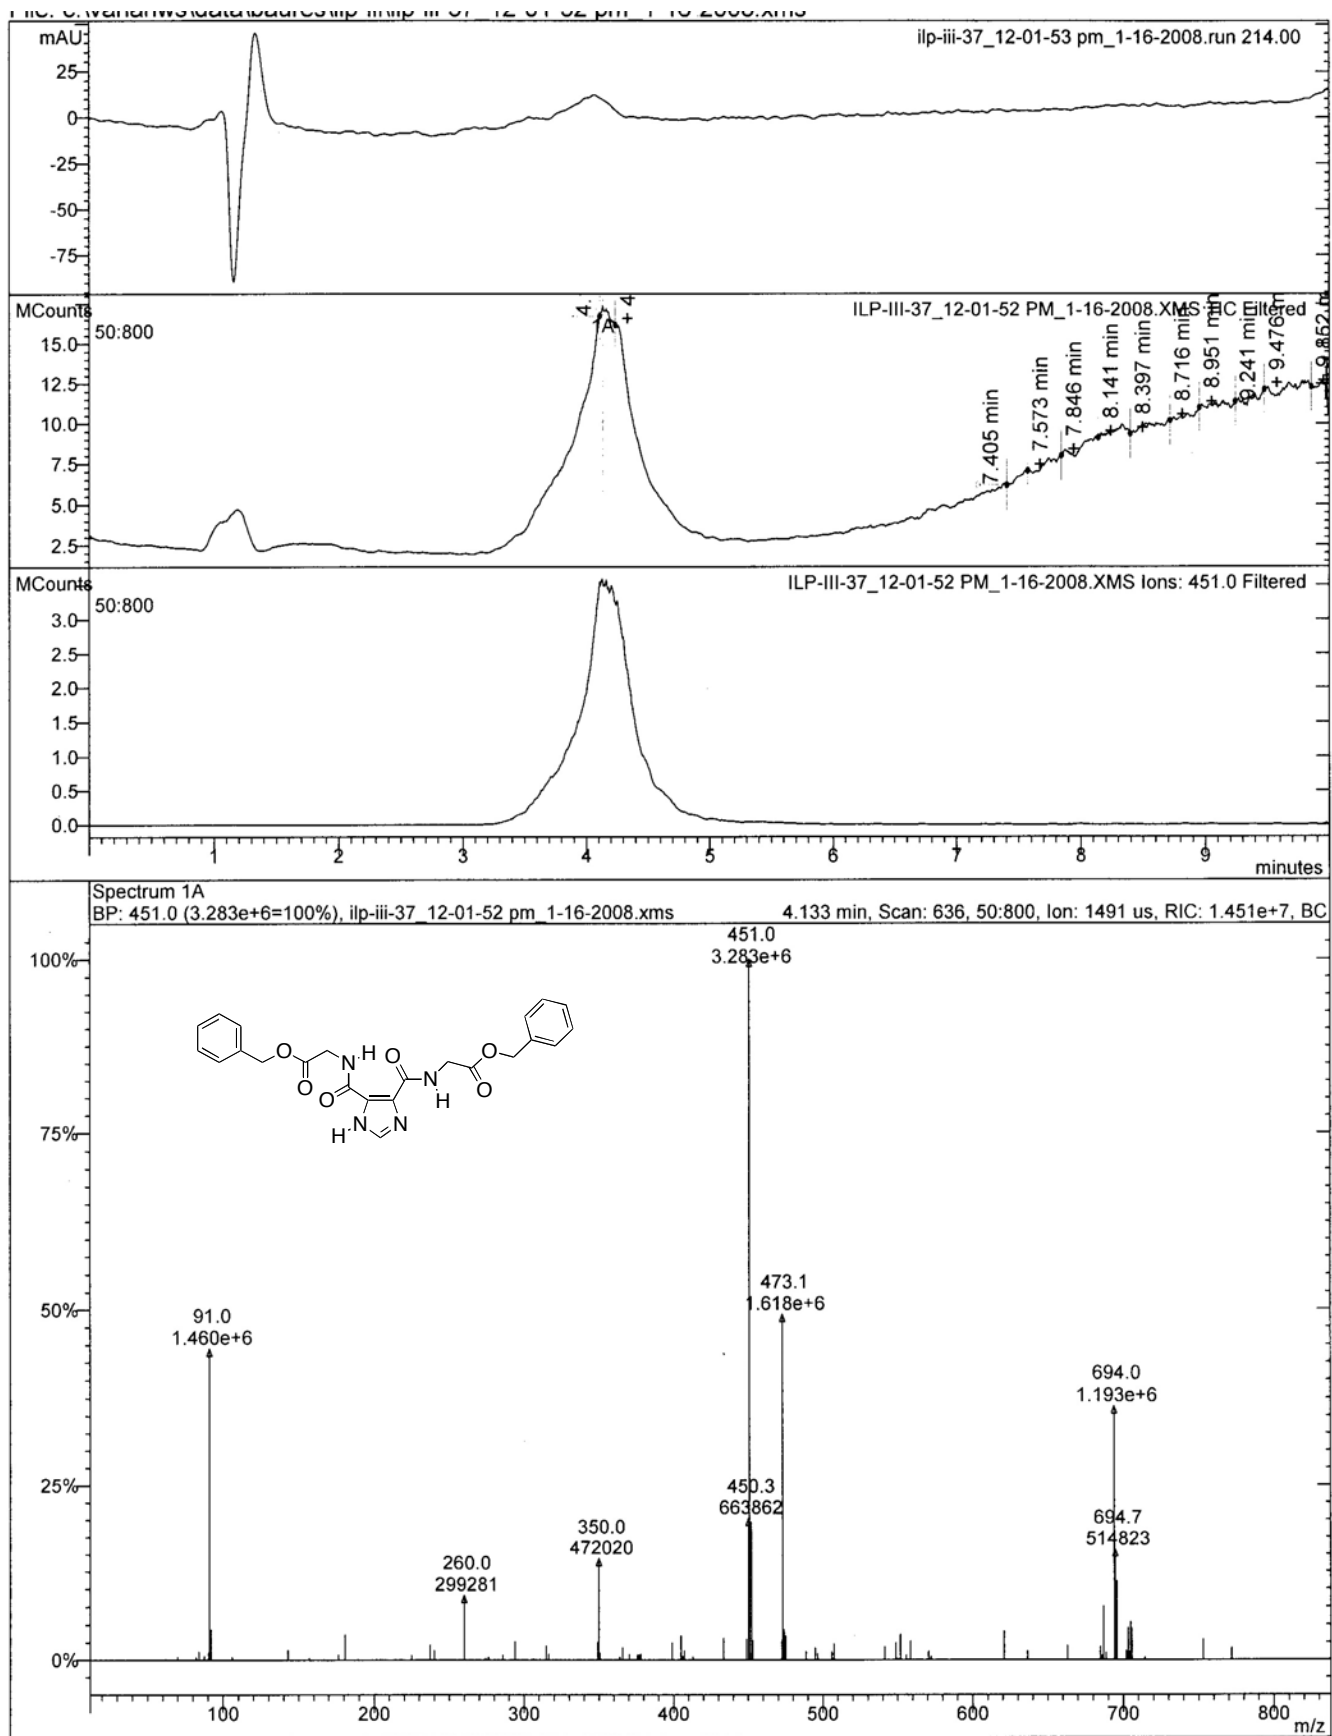

Figure S2. LC/MS data for 4{2}.

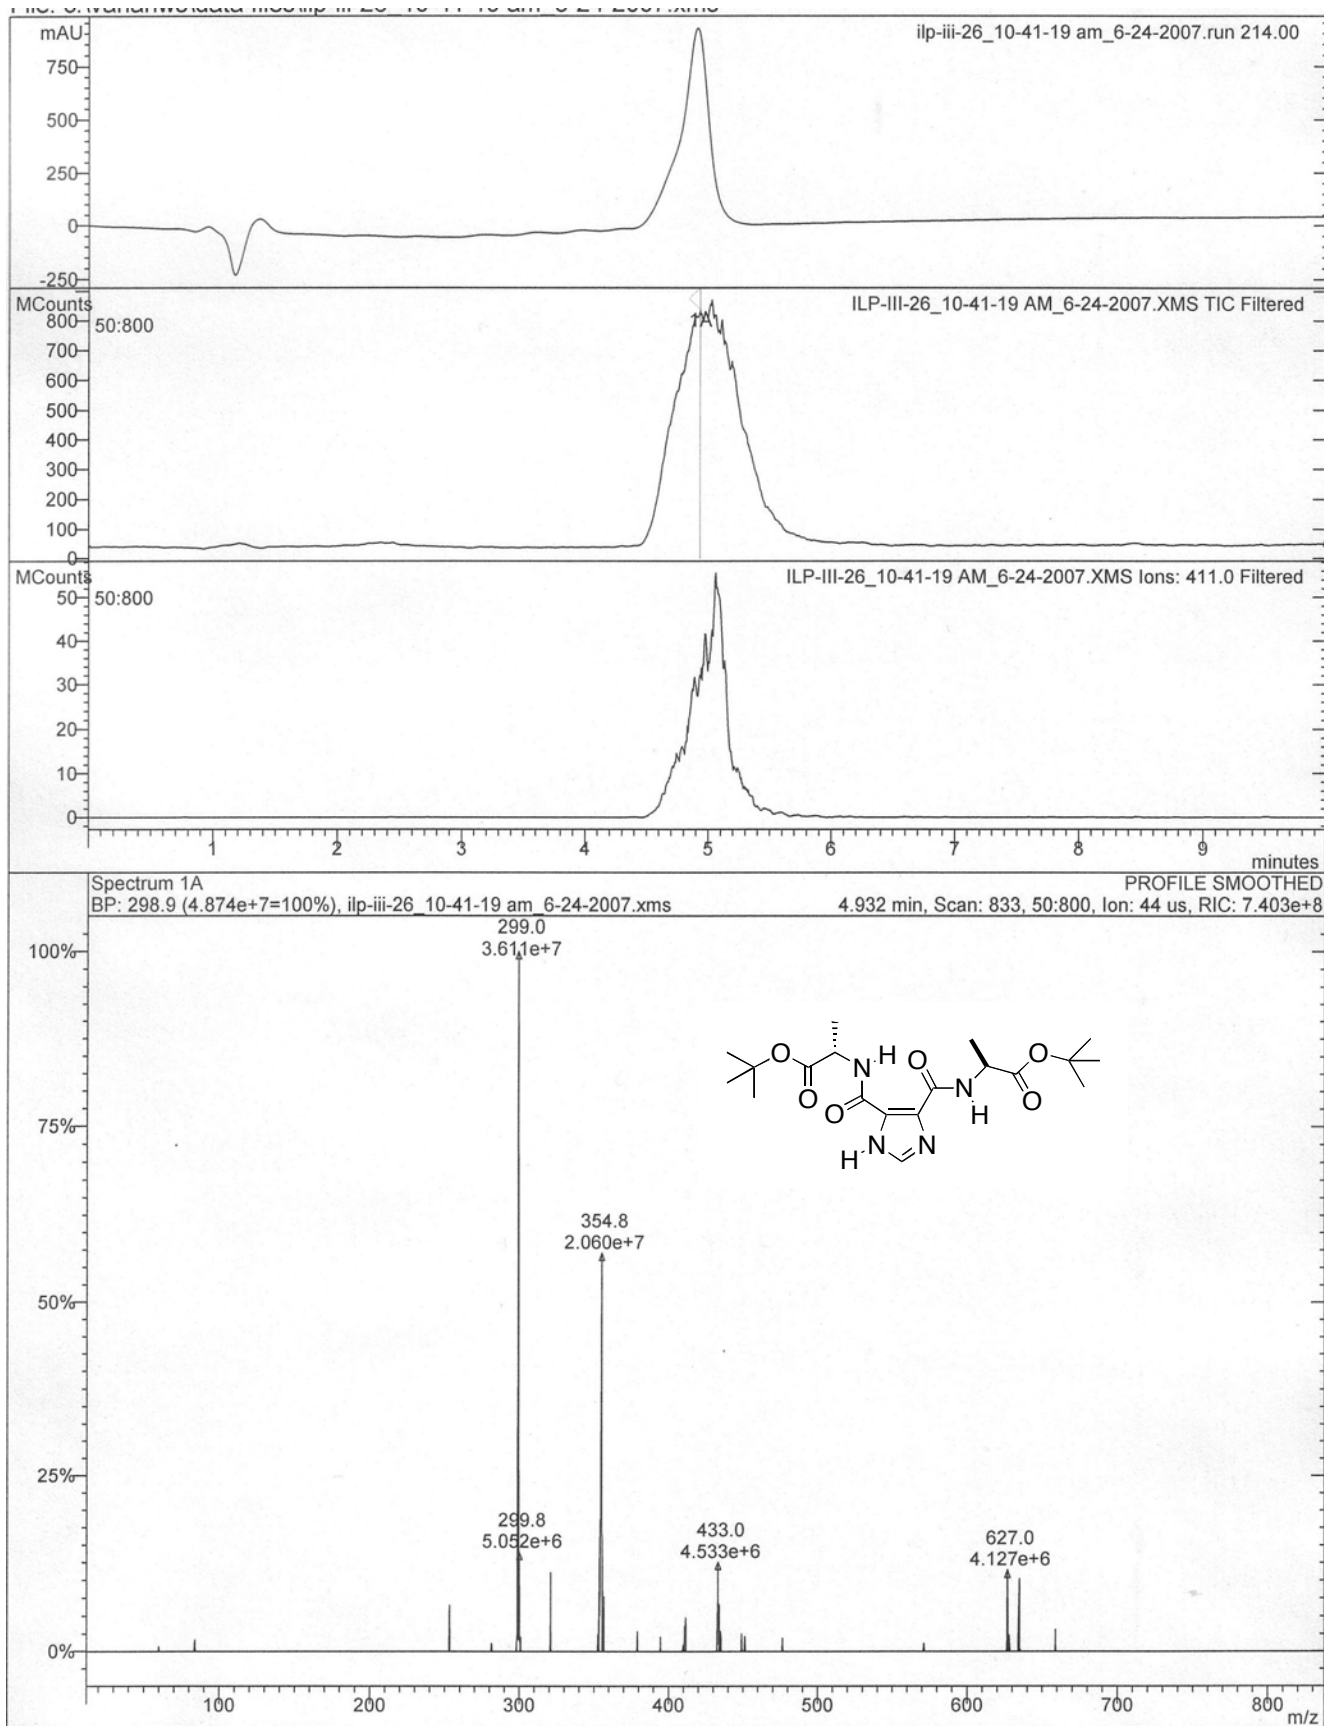

Figure S3. LC/MS data for 4{3}.

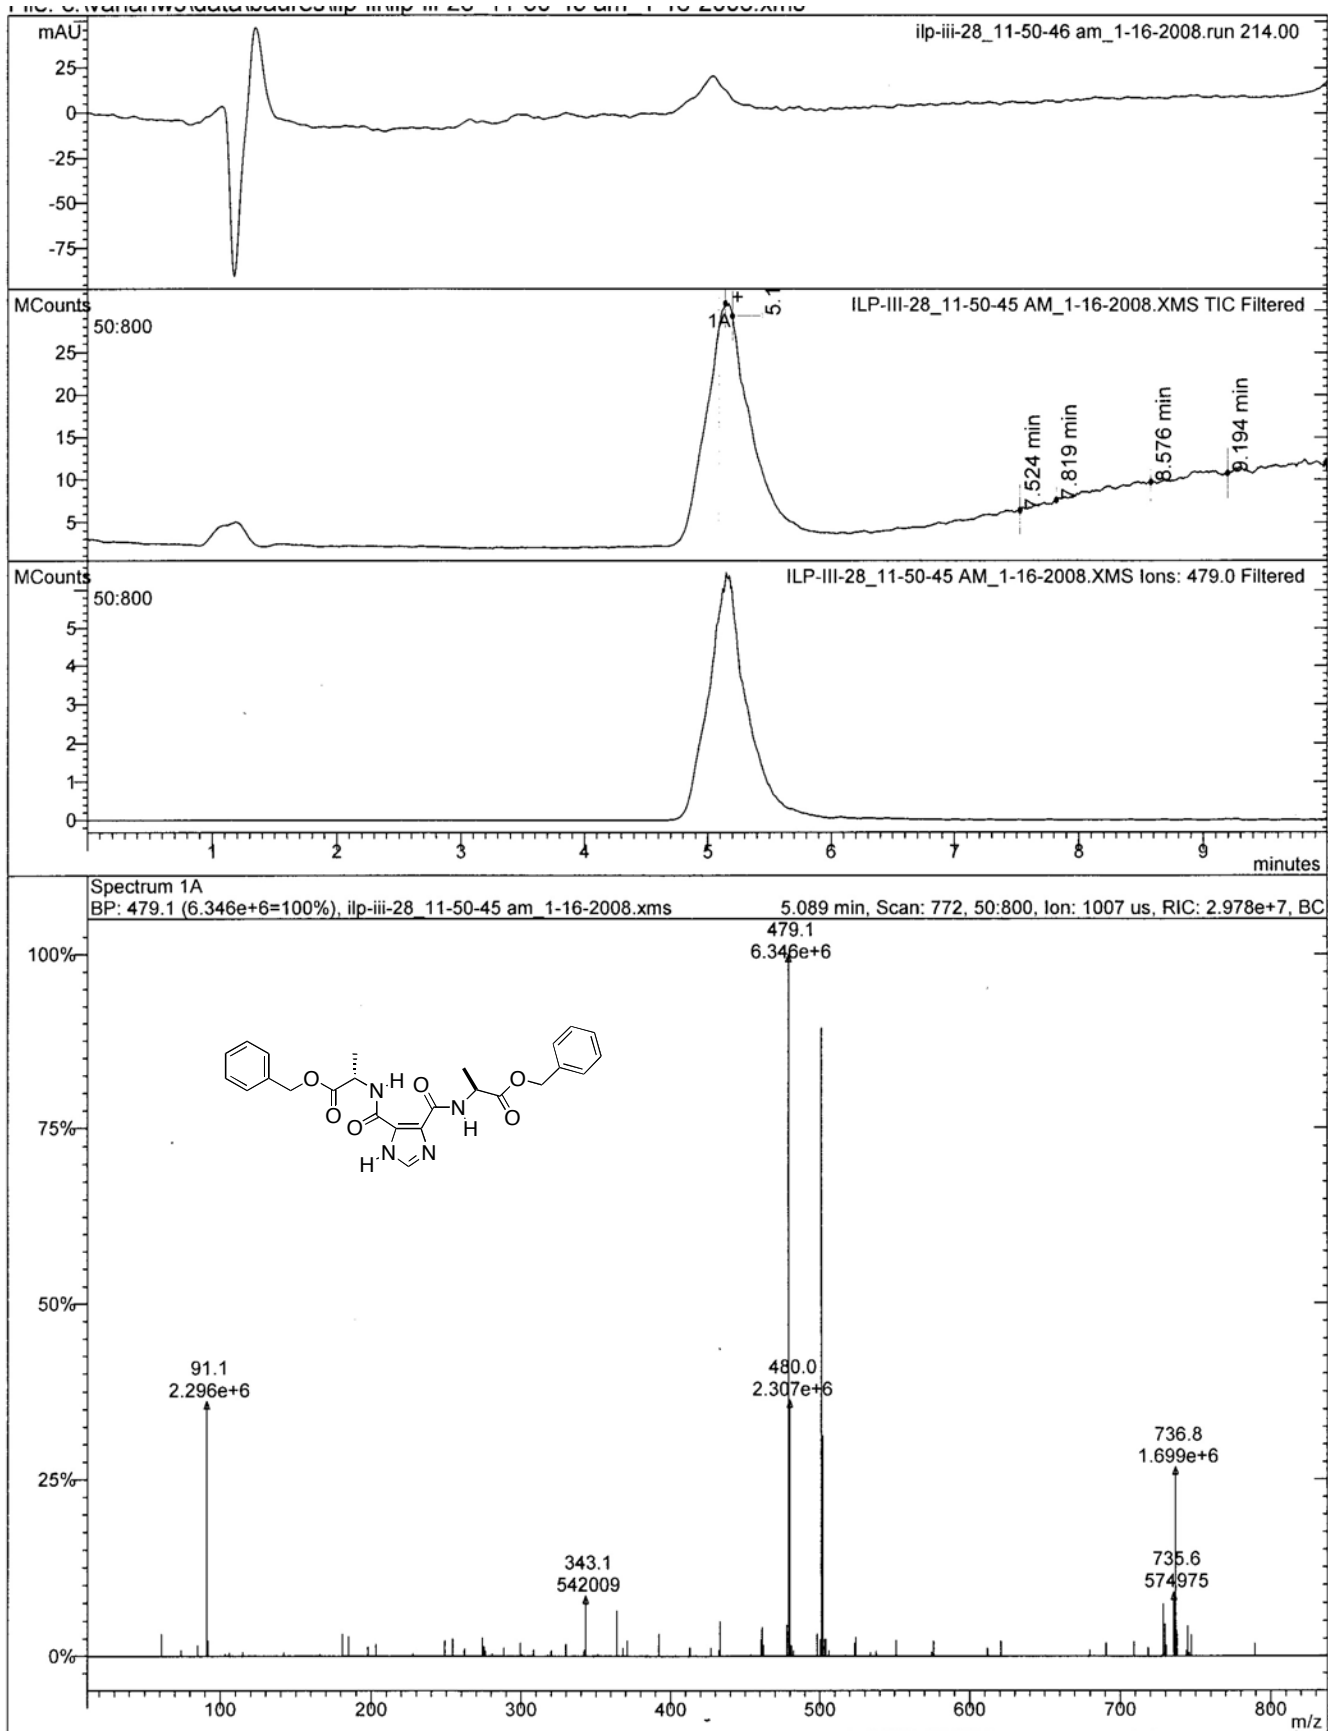

Figure S4. LC/MS data for 4{4}.

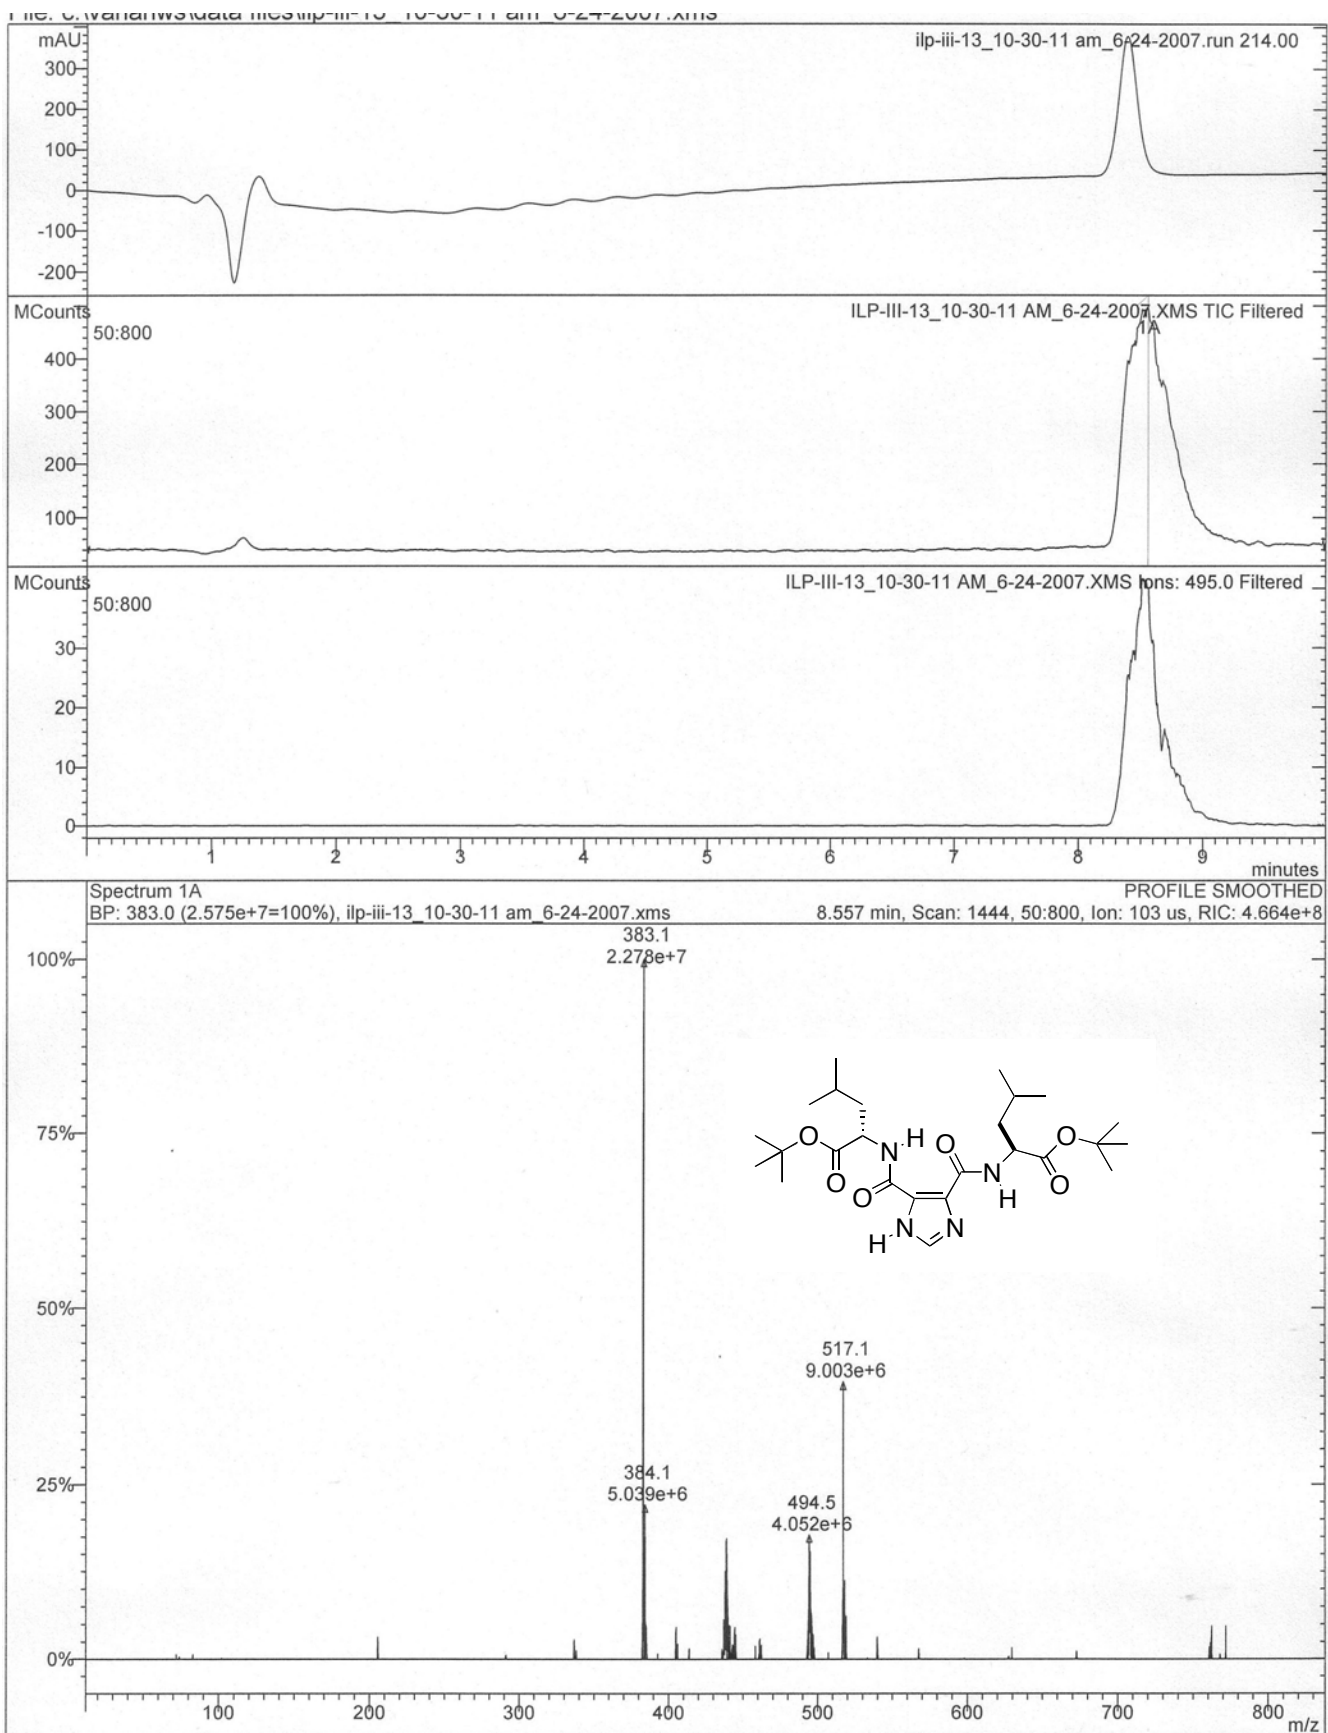

Figure S5. LC/MS data for 4{5}.

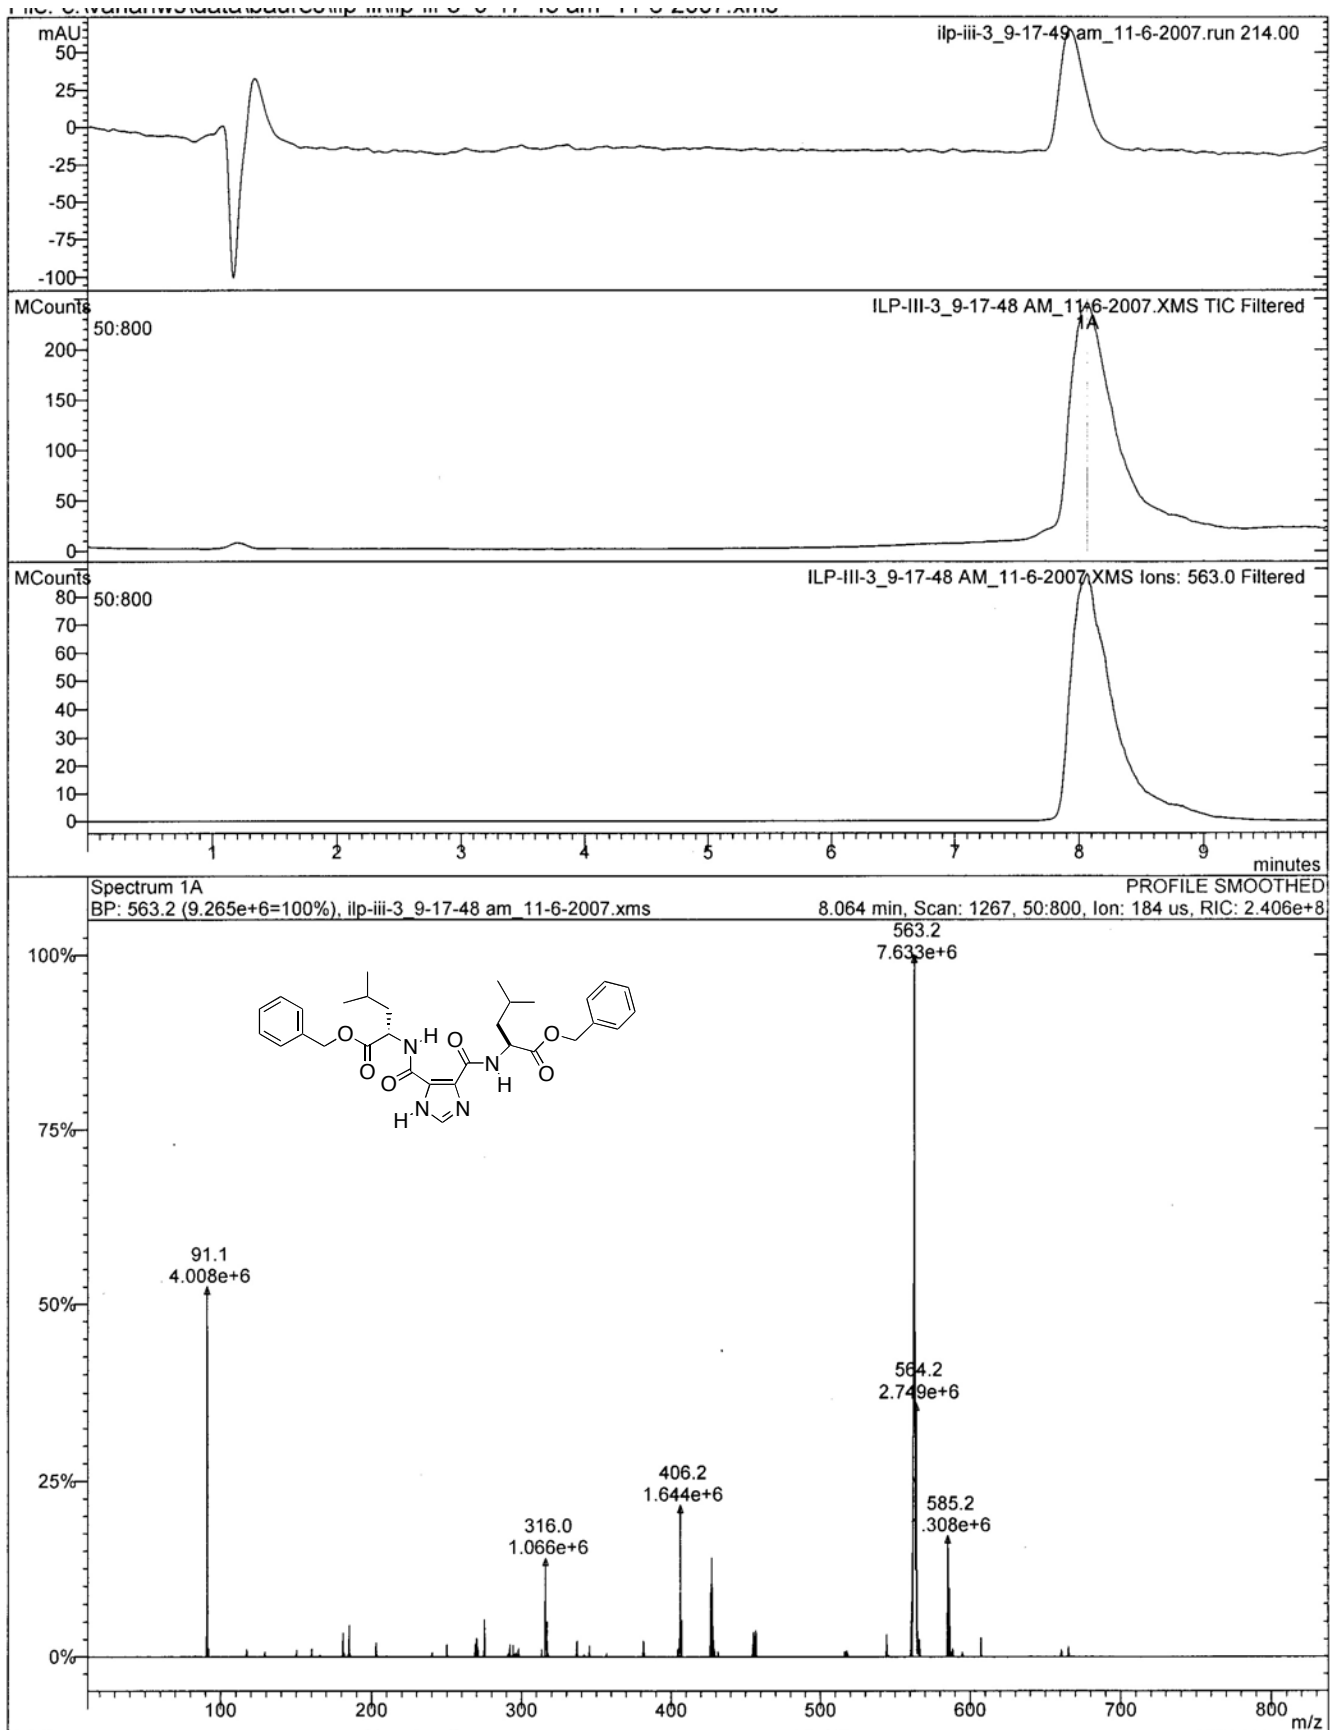

Figure S6. LC/MS data for 4{6}.

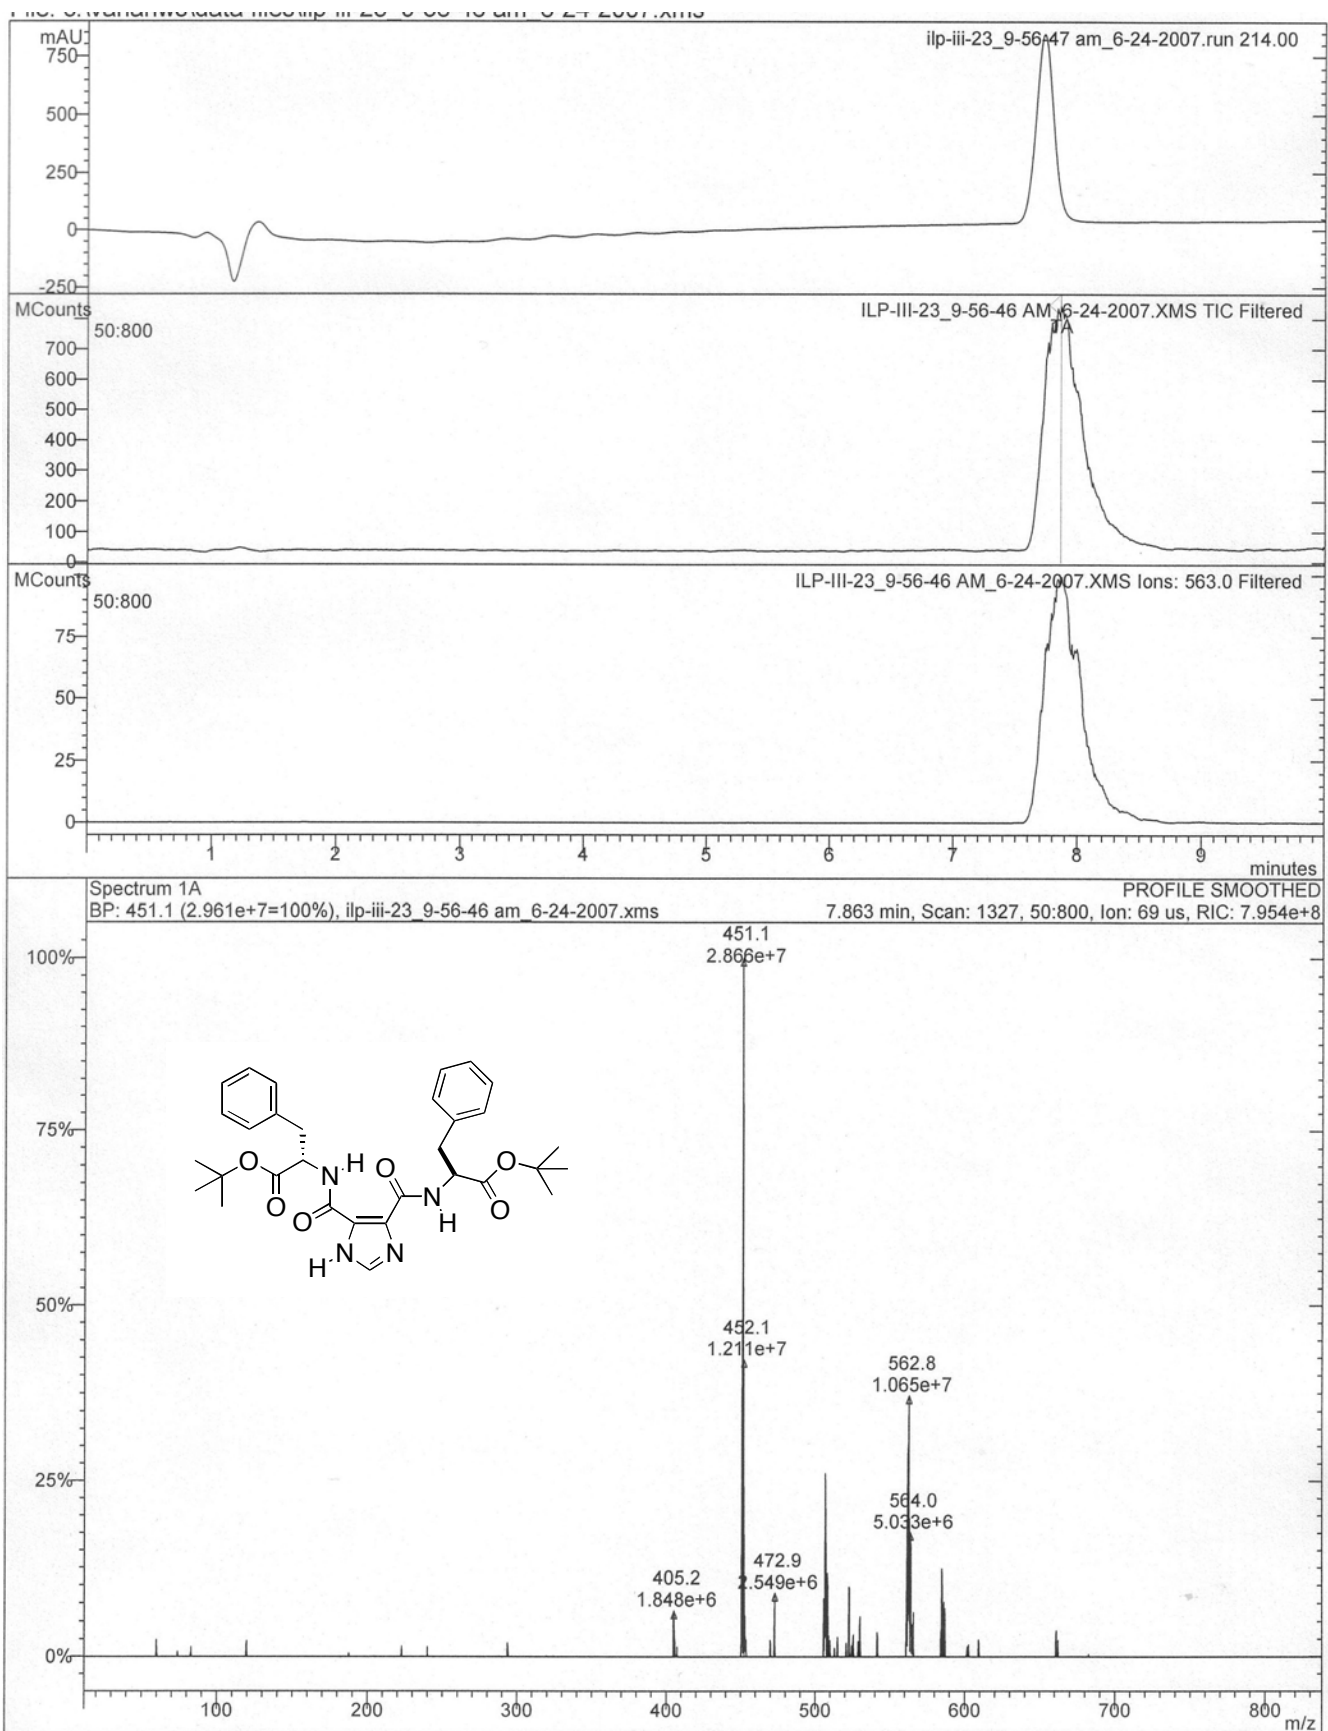

Figure S7. LC/MS data for 4{7}.

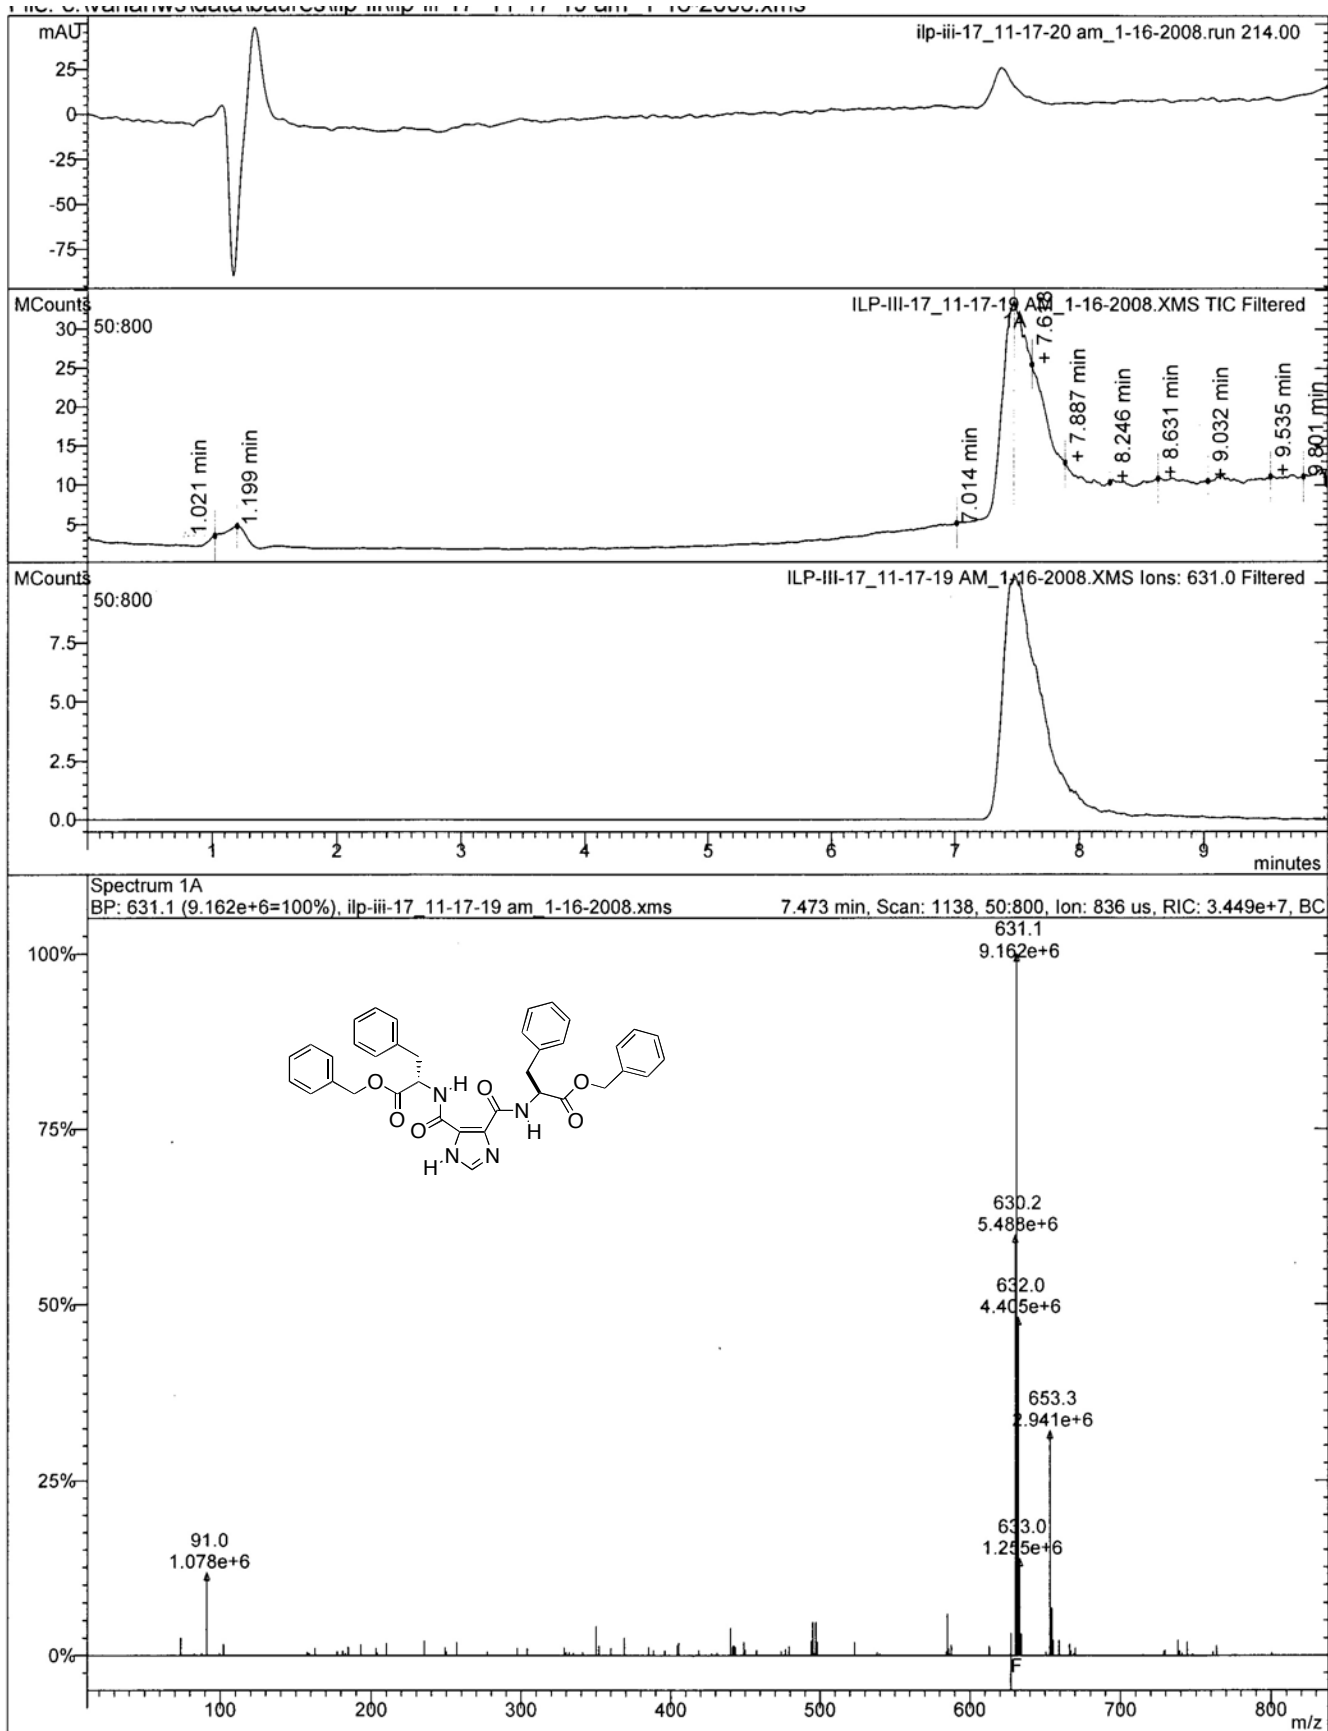

Figure S8. LC/MS data for 4{8}.



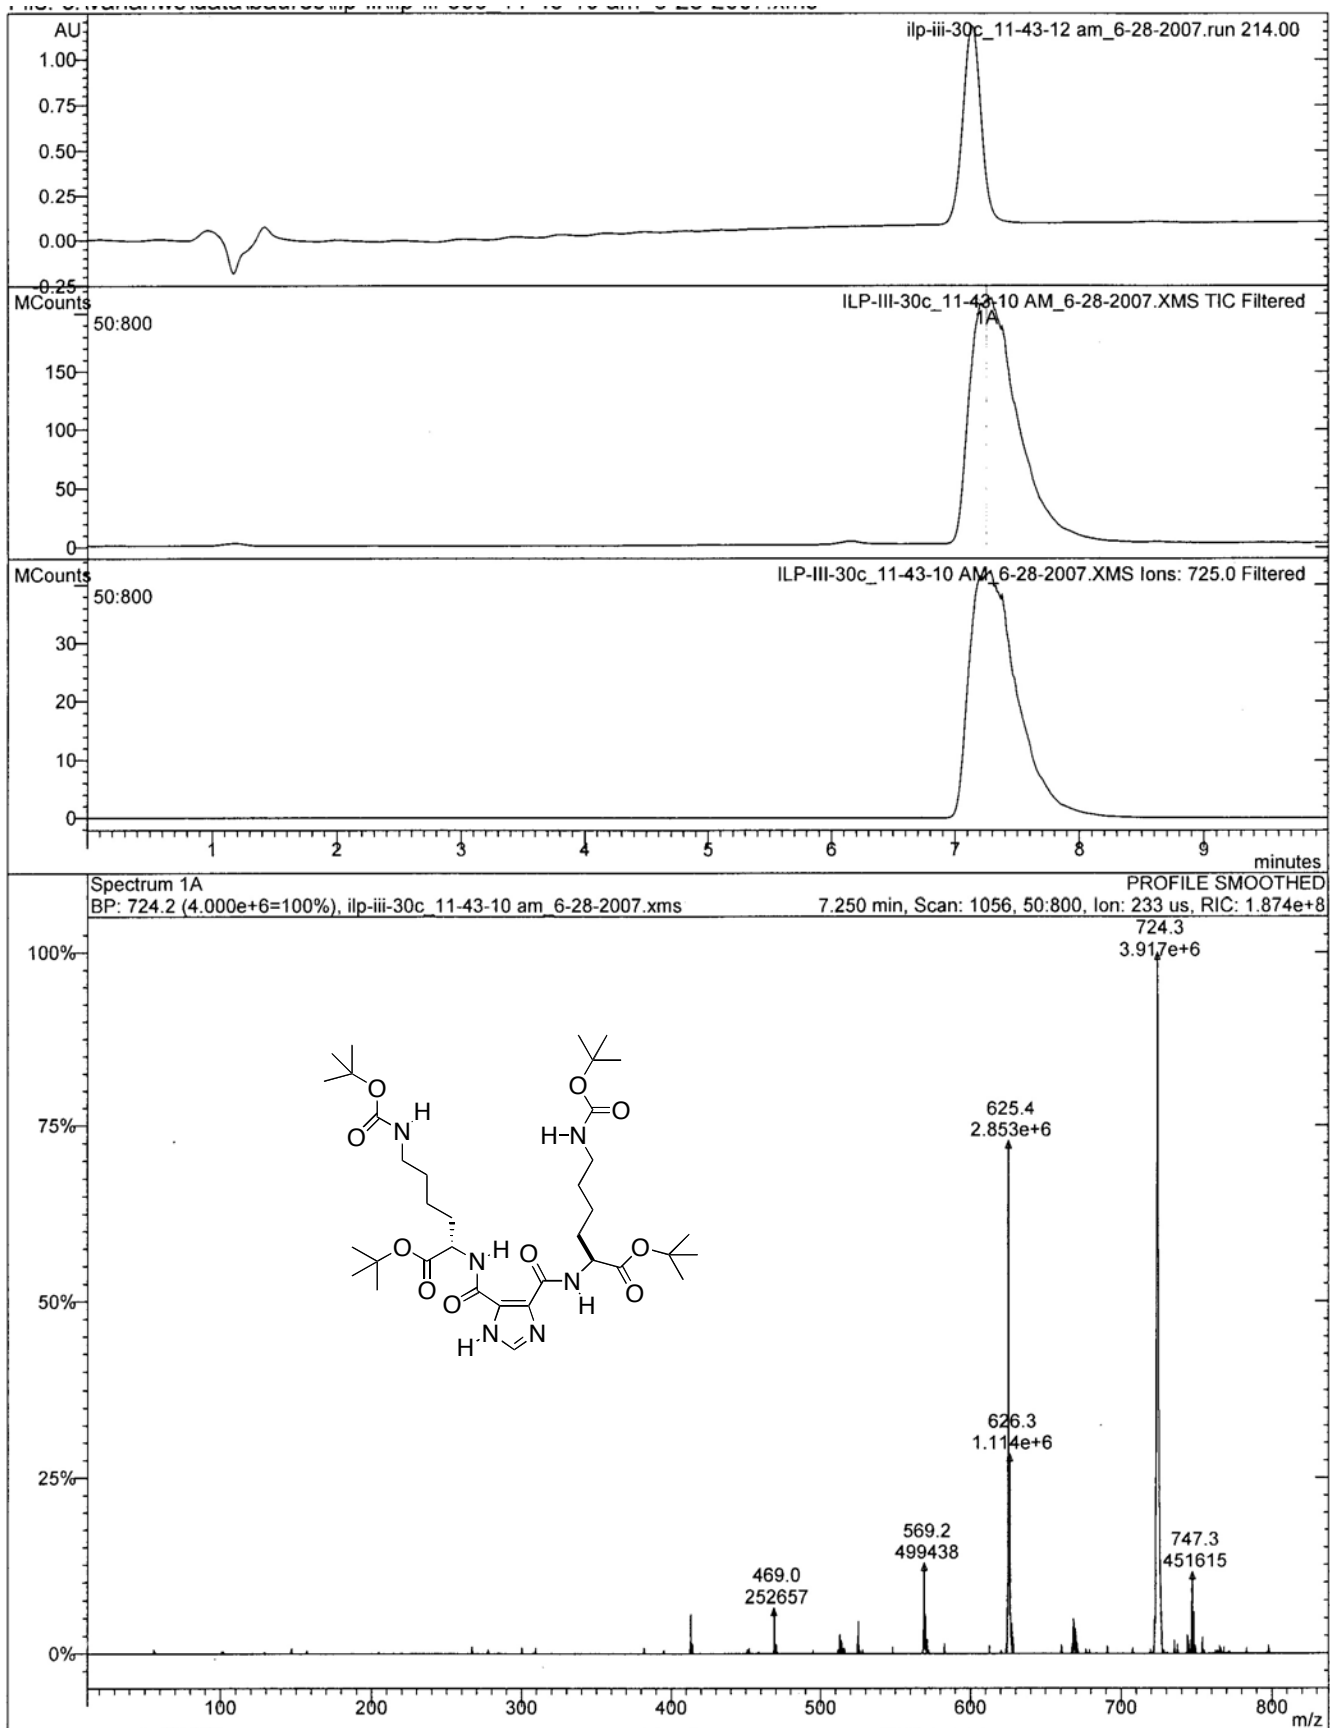

Figure S9. LC/MS data for 4{9}.

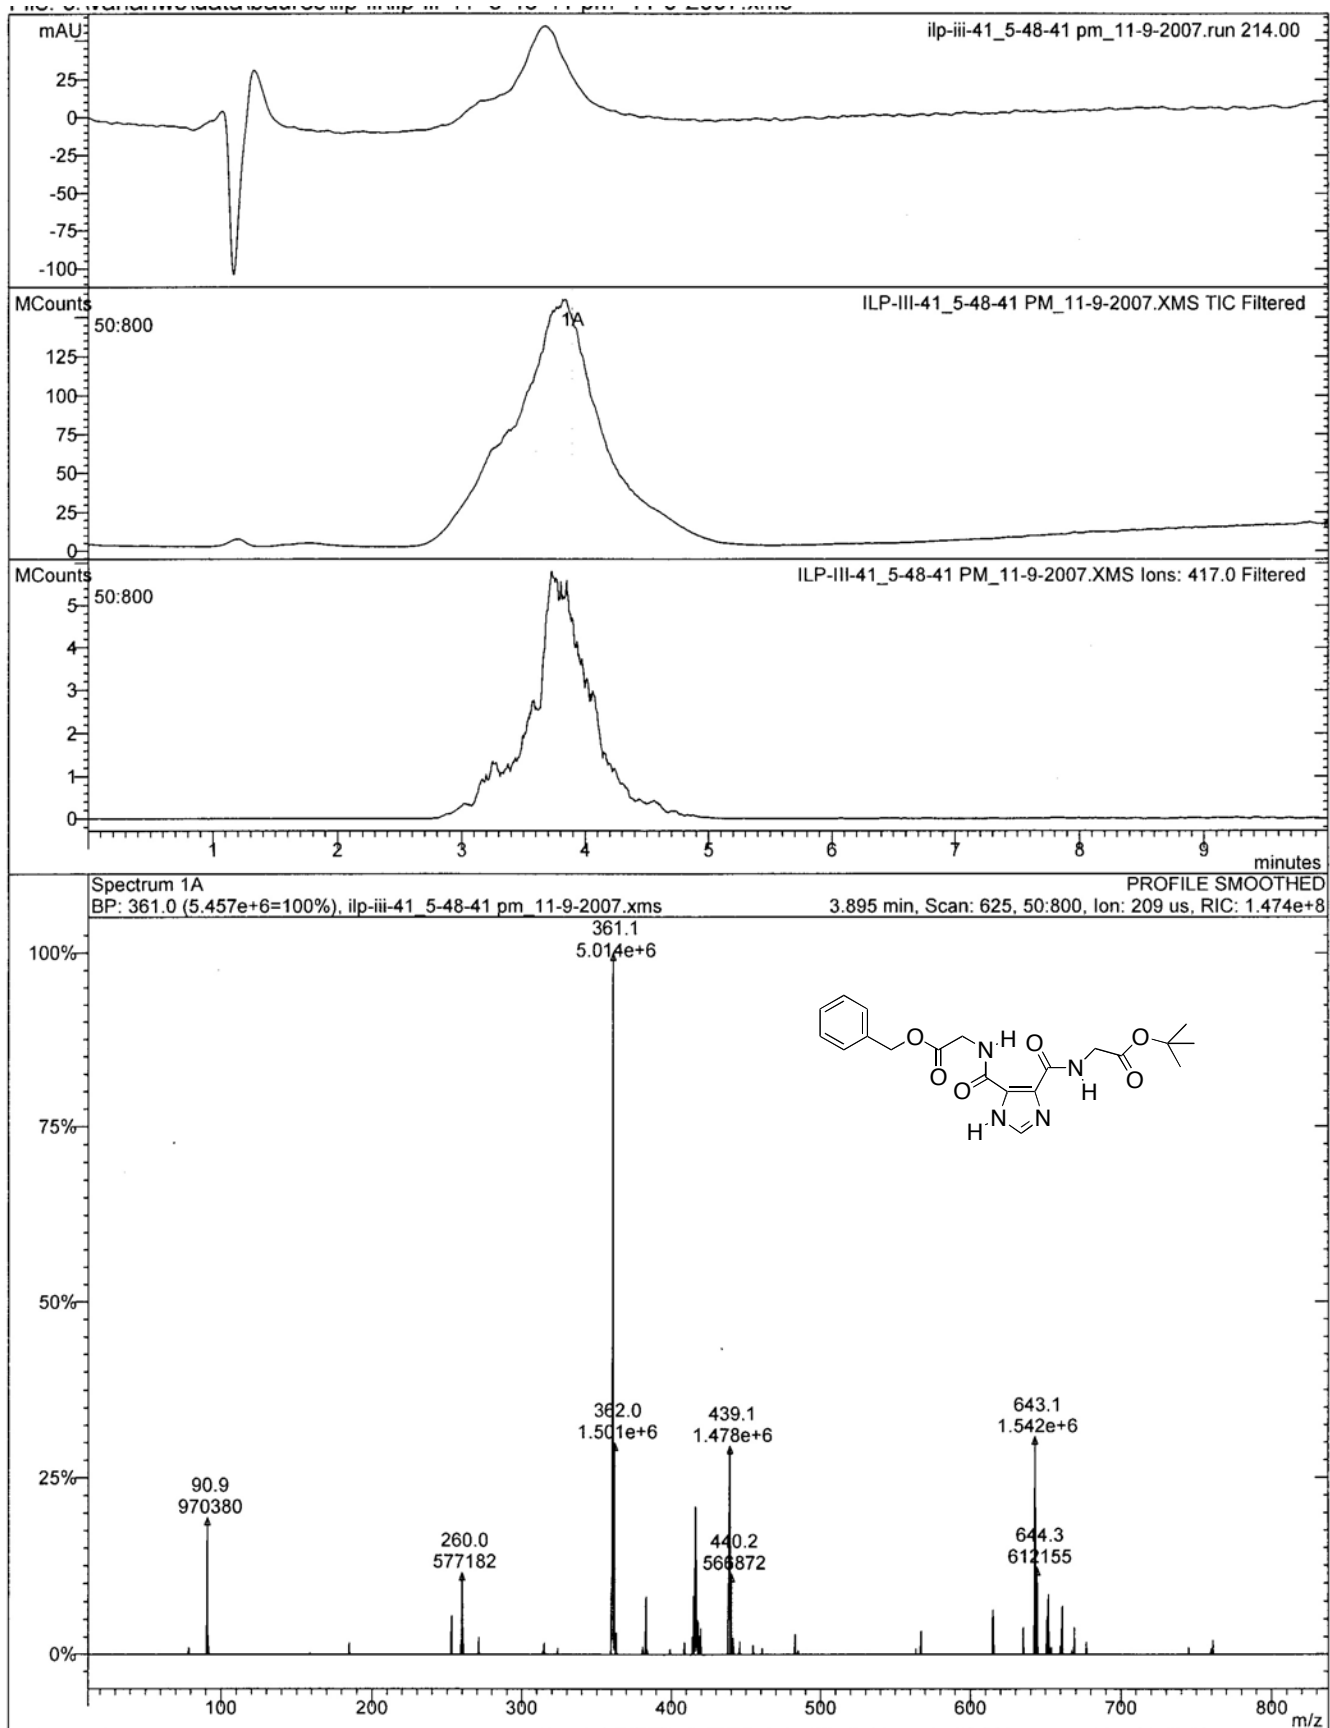

Figure S10. LC/MS data for 4{10}.

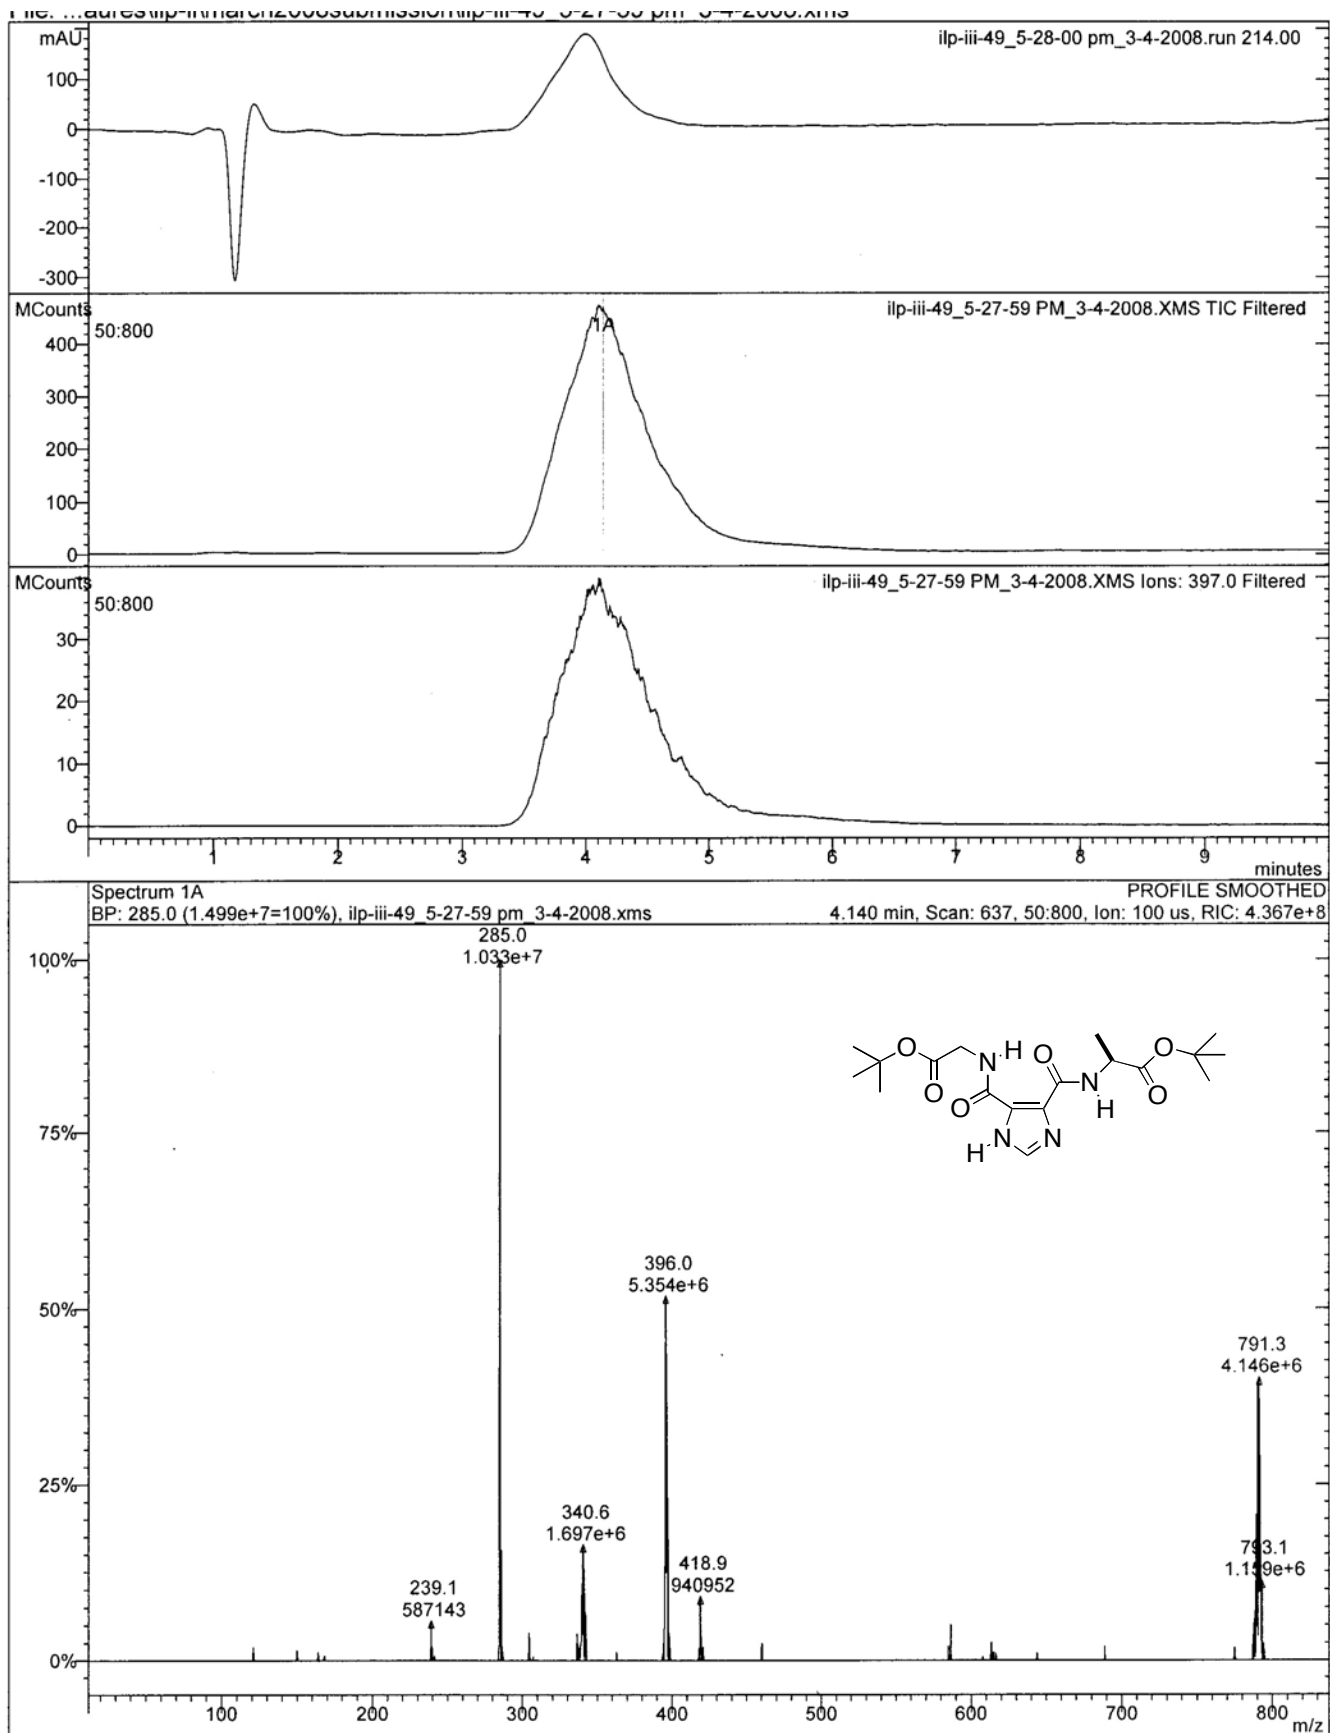

Figure S11. LC/MS data for 4{11}.

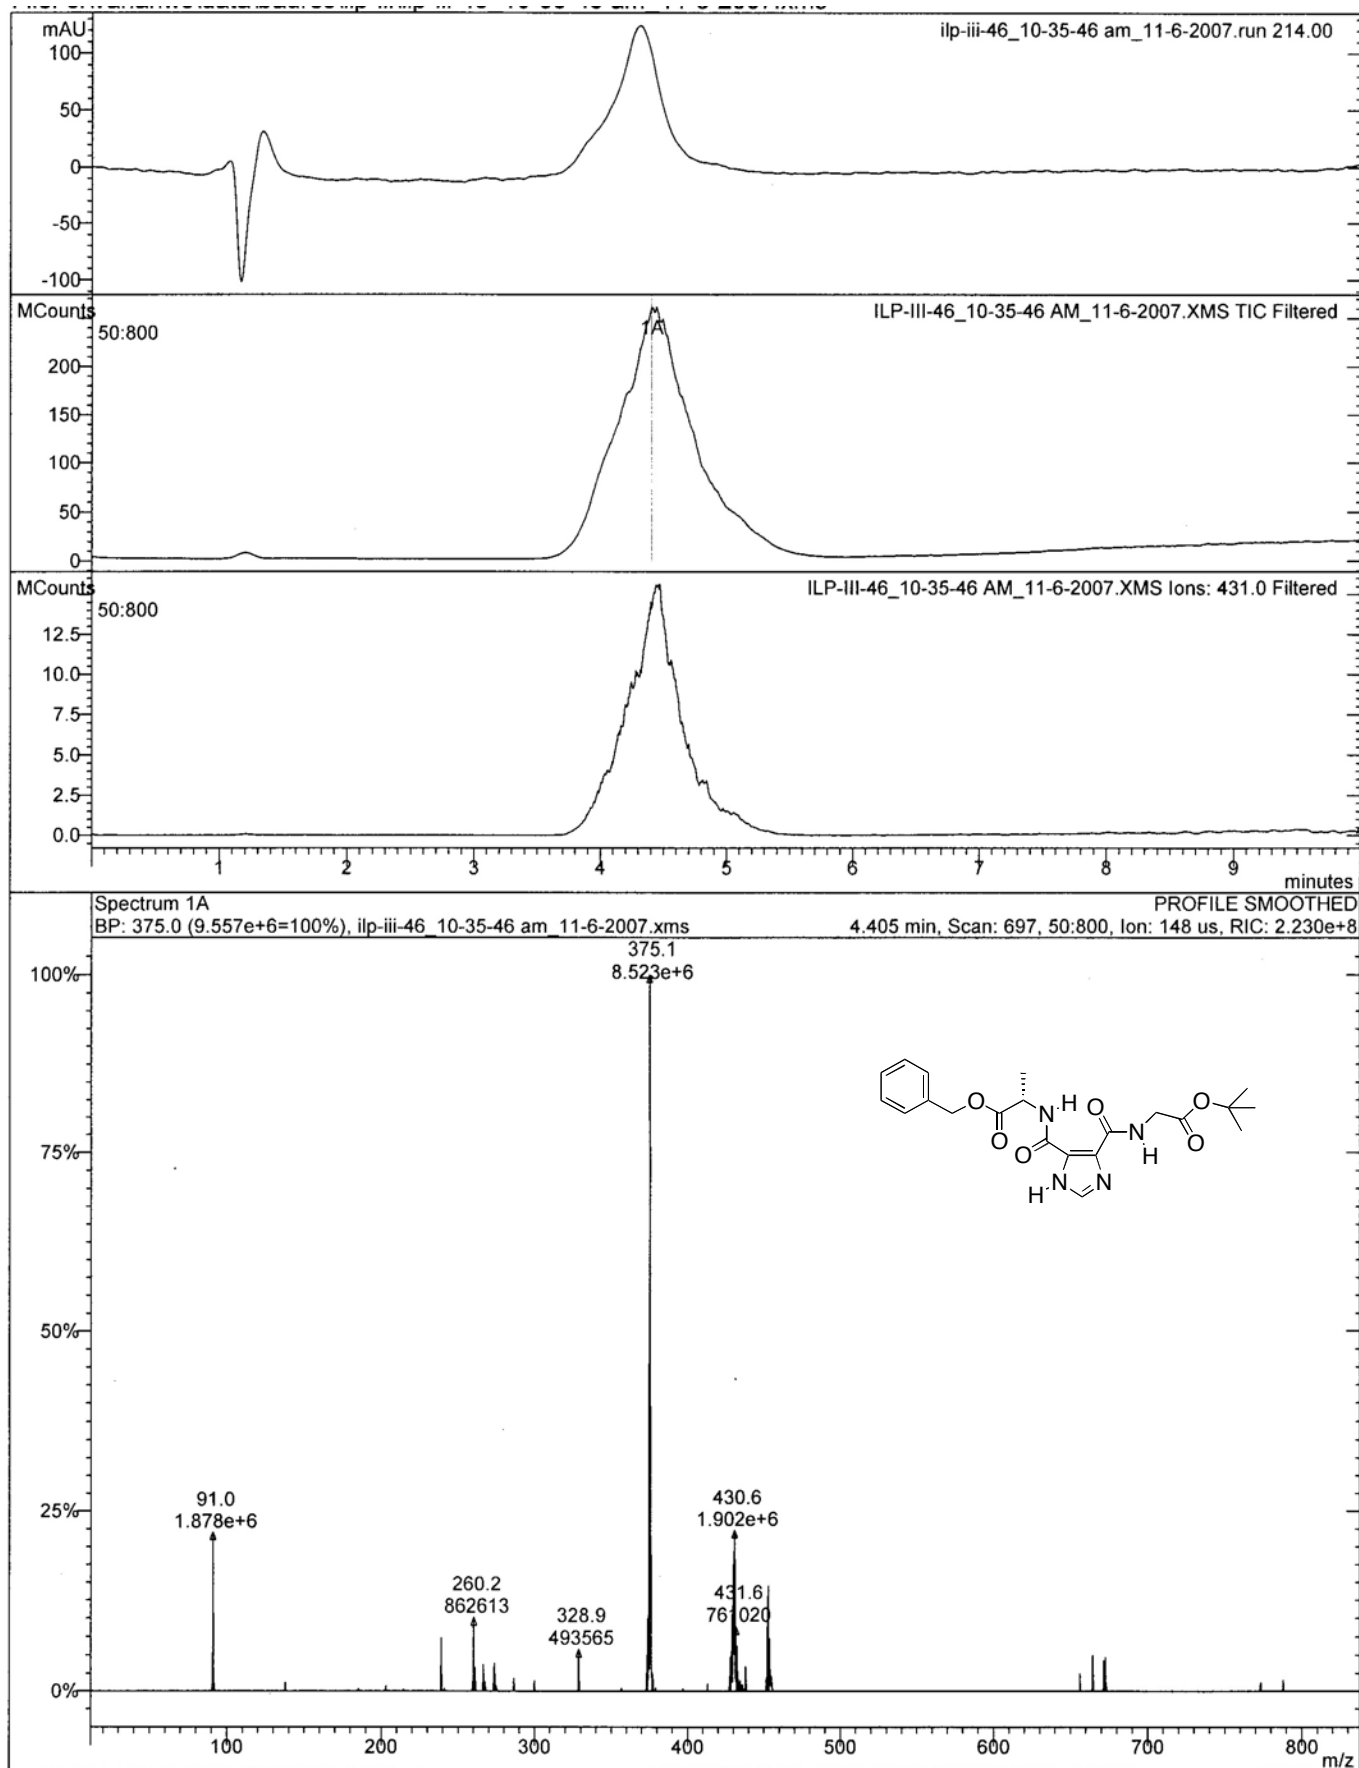

Figure S12. LC/MS data for 4{12}.

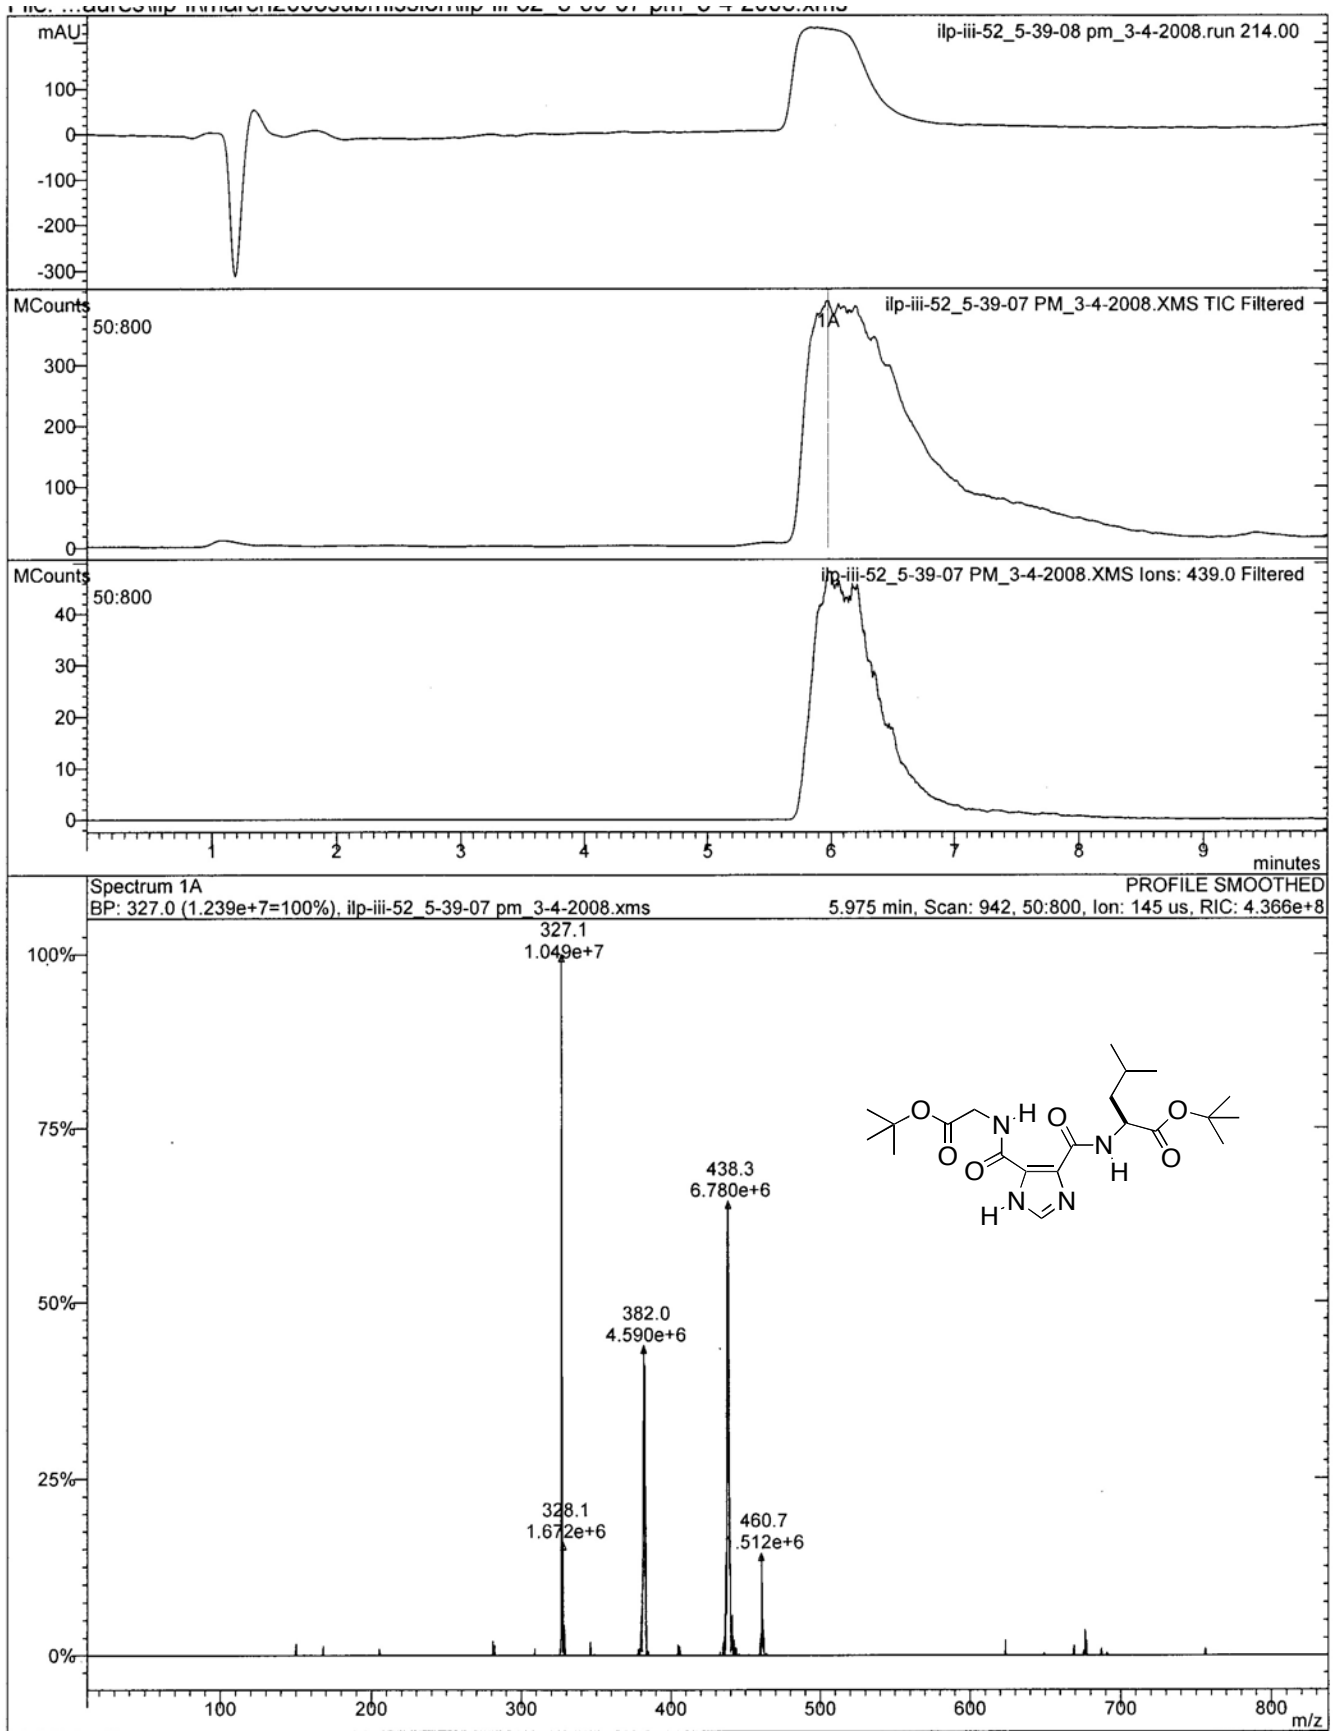

Figure S13. LC/MS data for 4{13}.

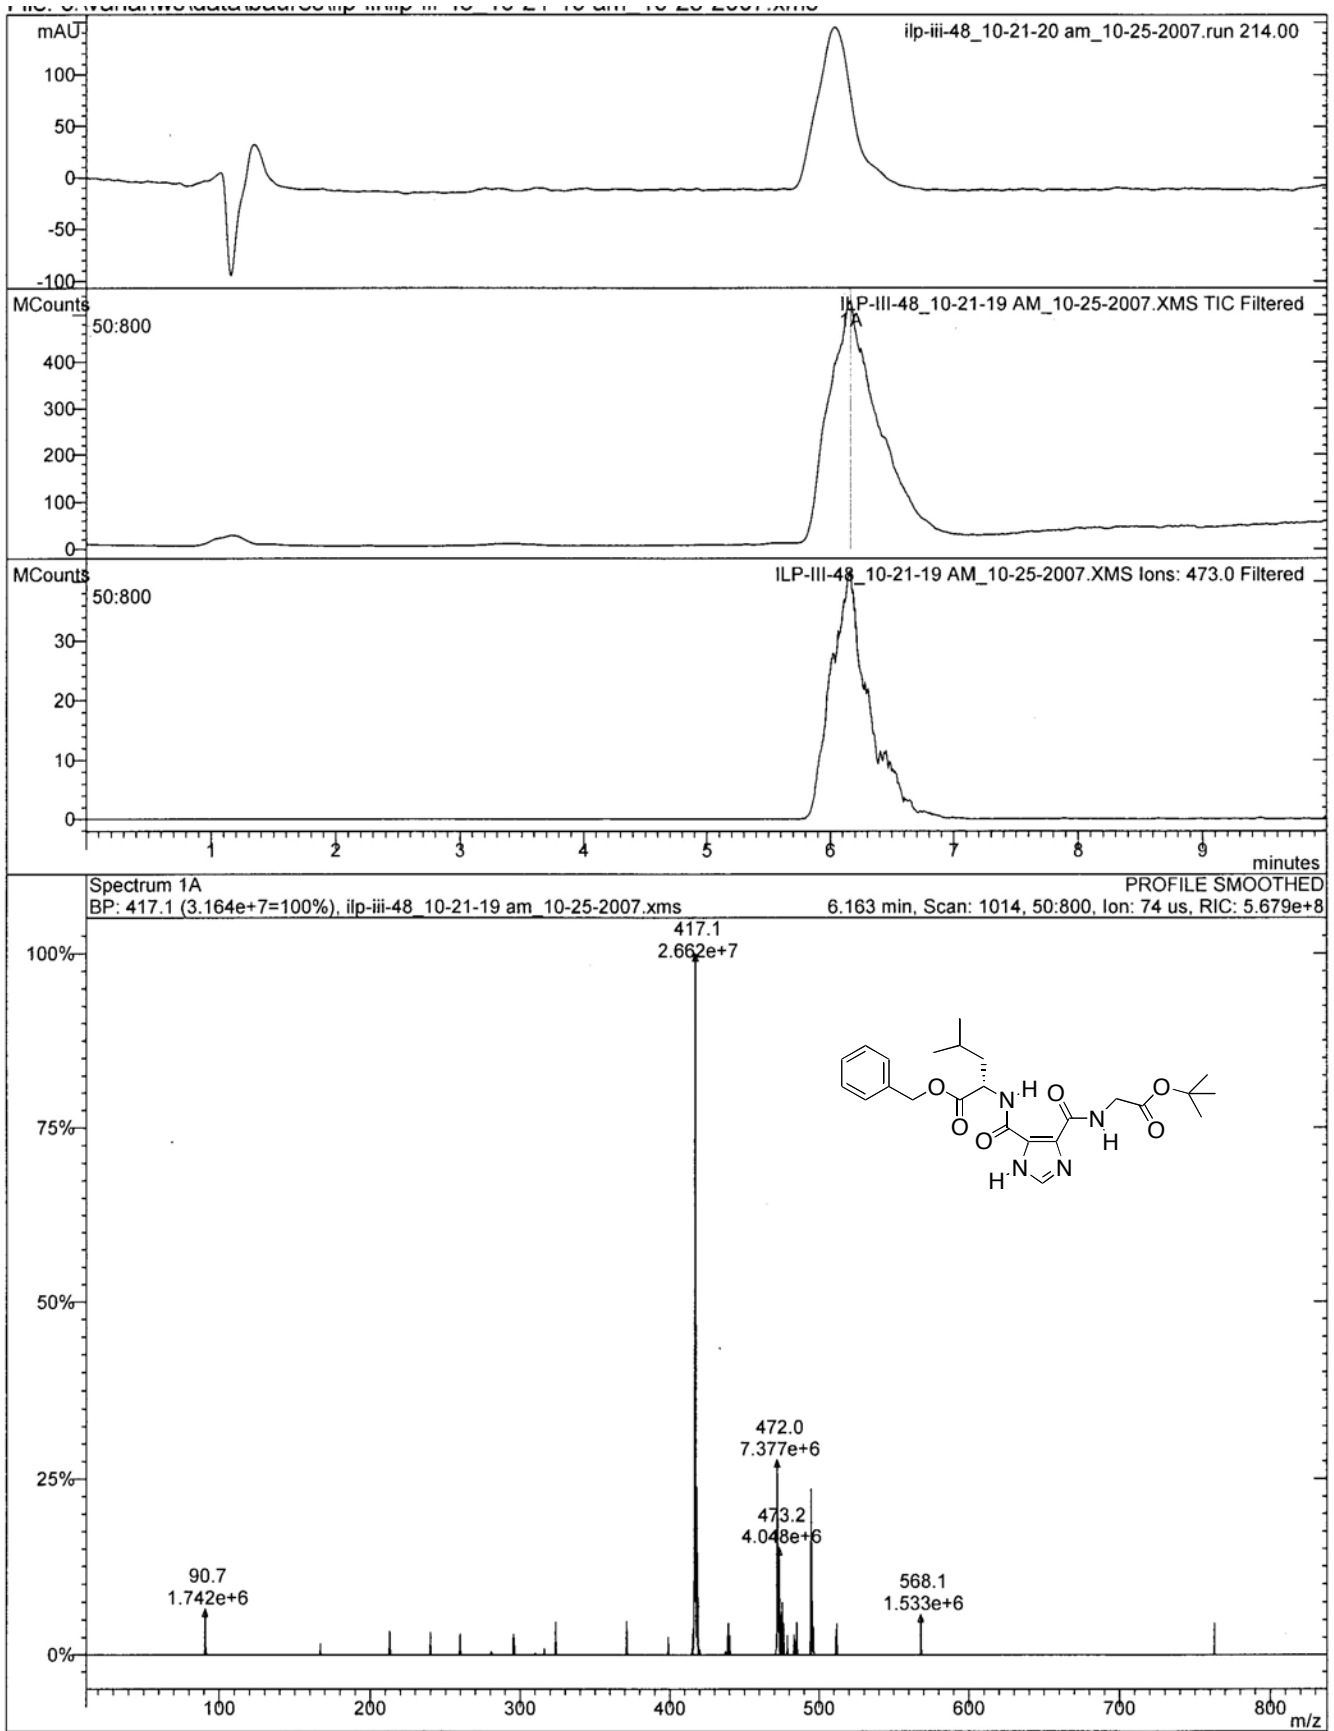

Figure S14. LC/MS data for 4{14}.

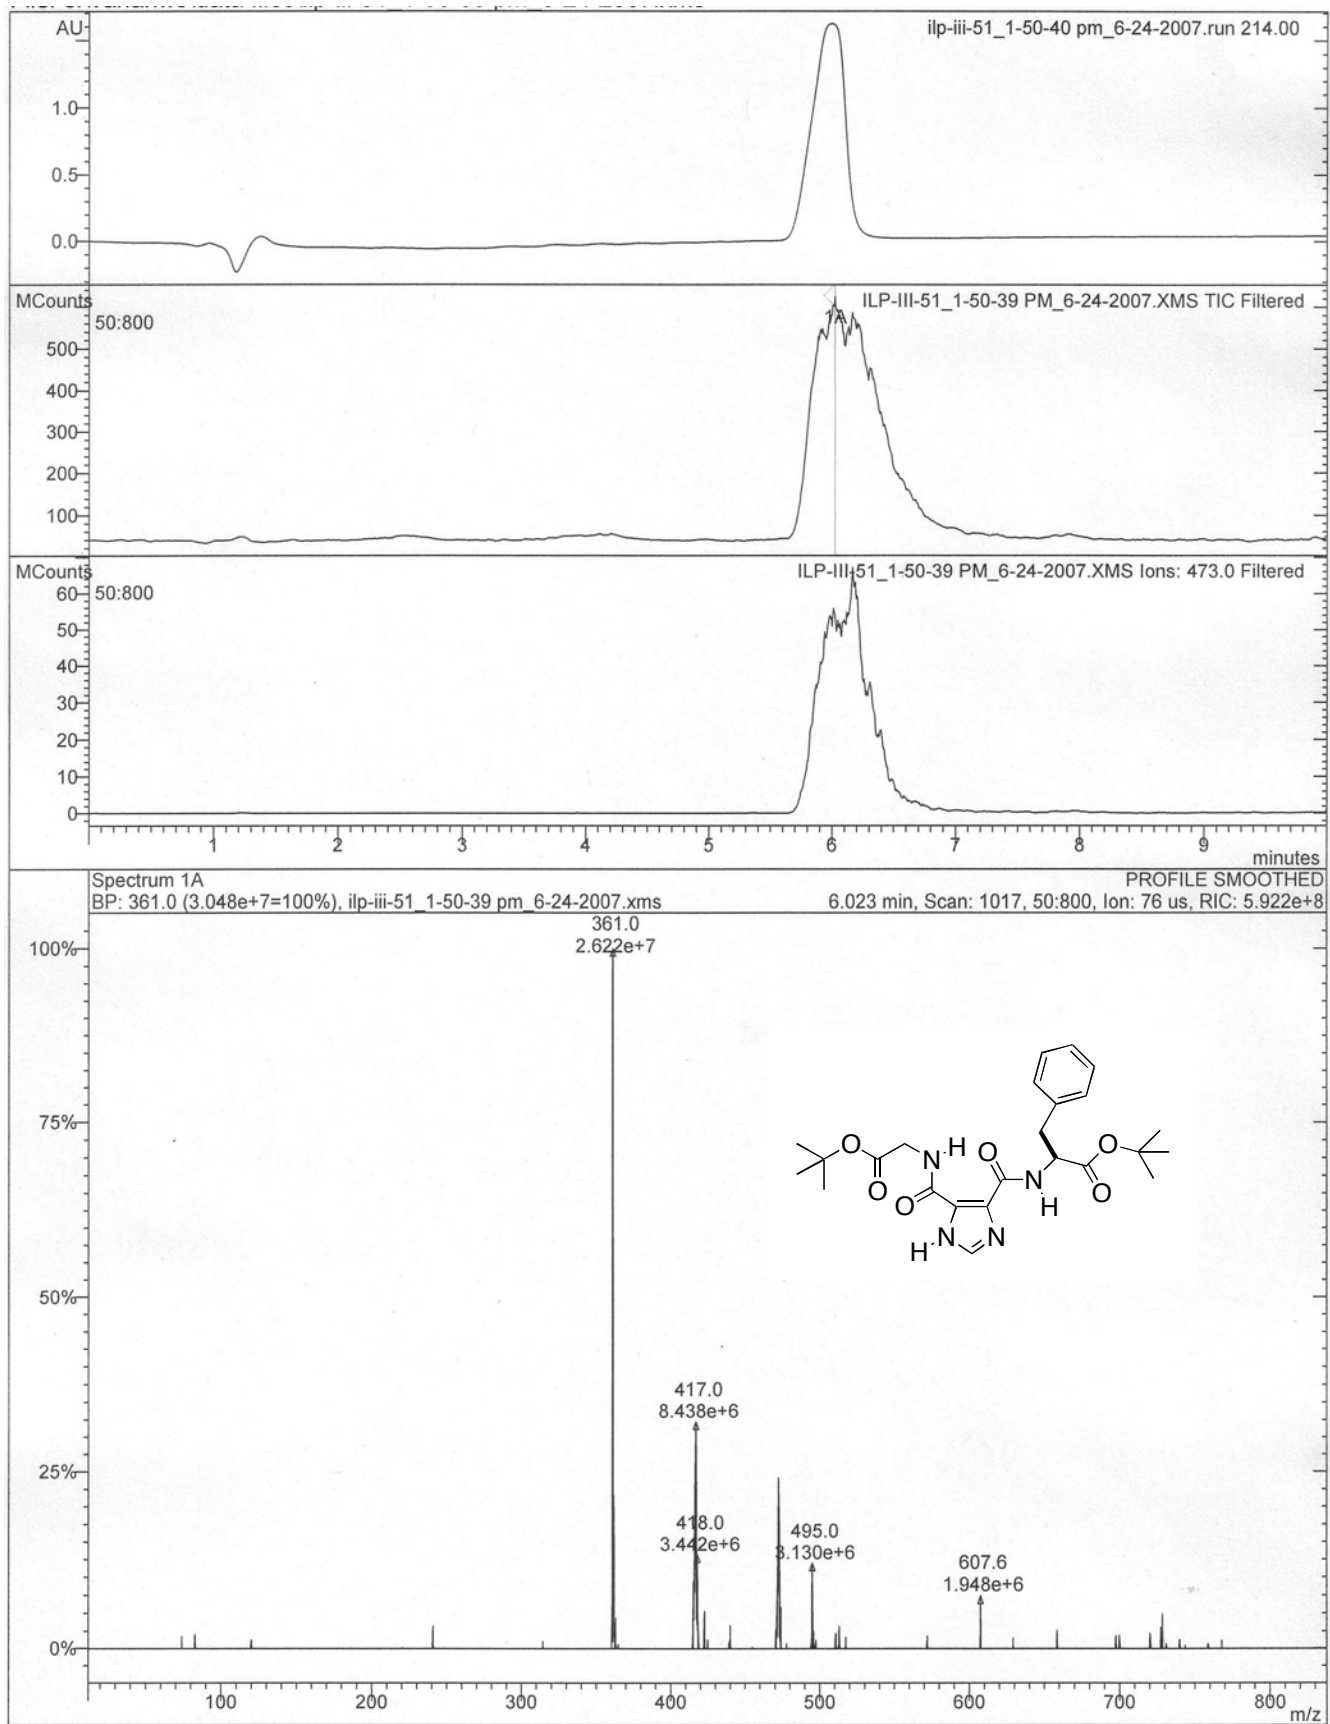

Figure S15. LC/MS data for 4{15}.

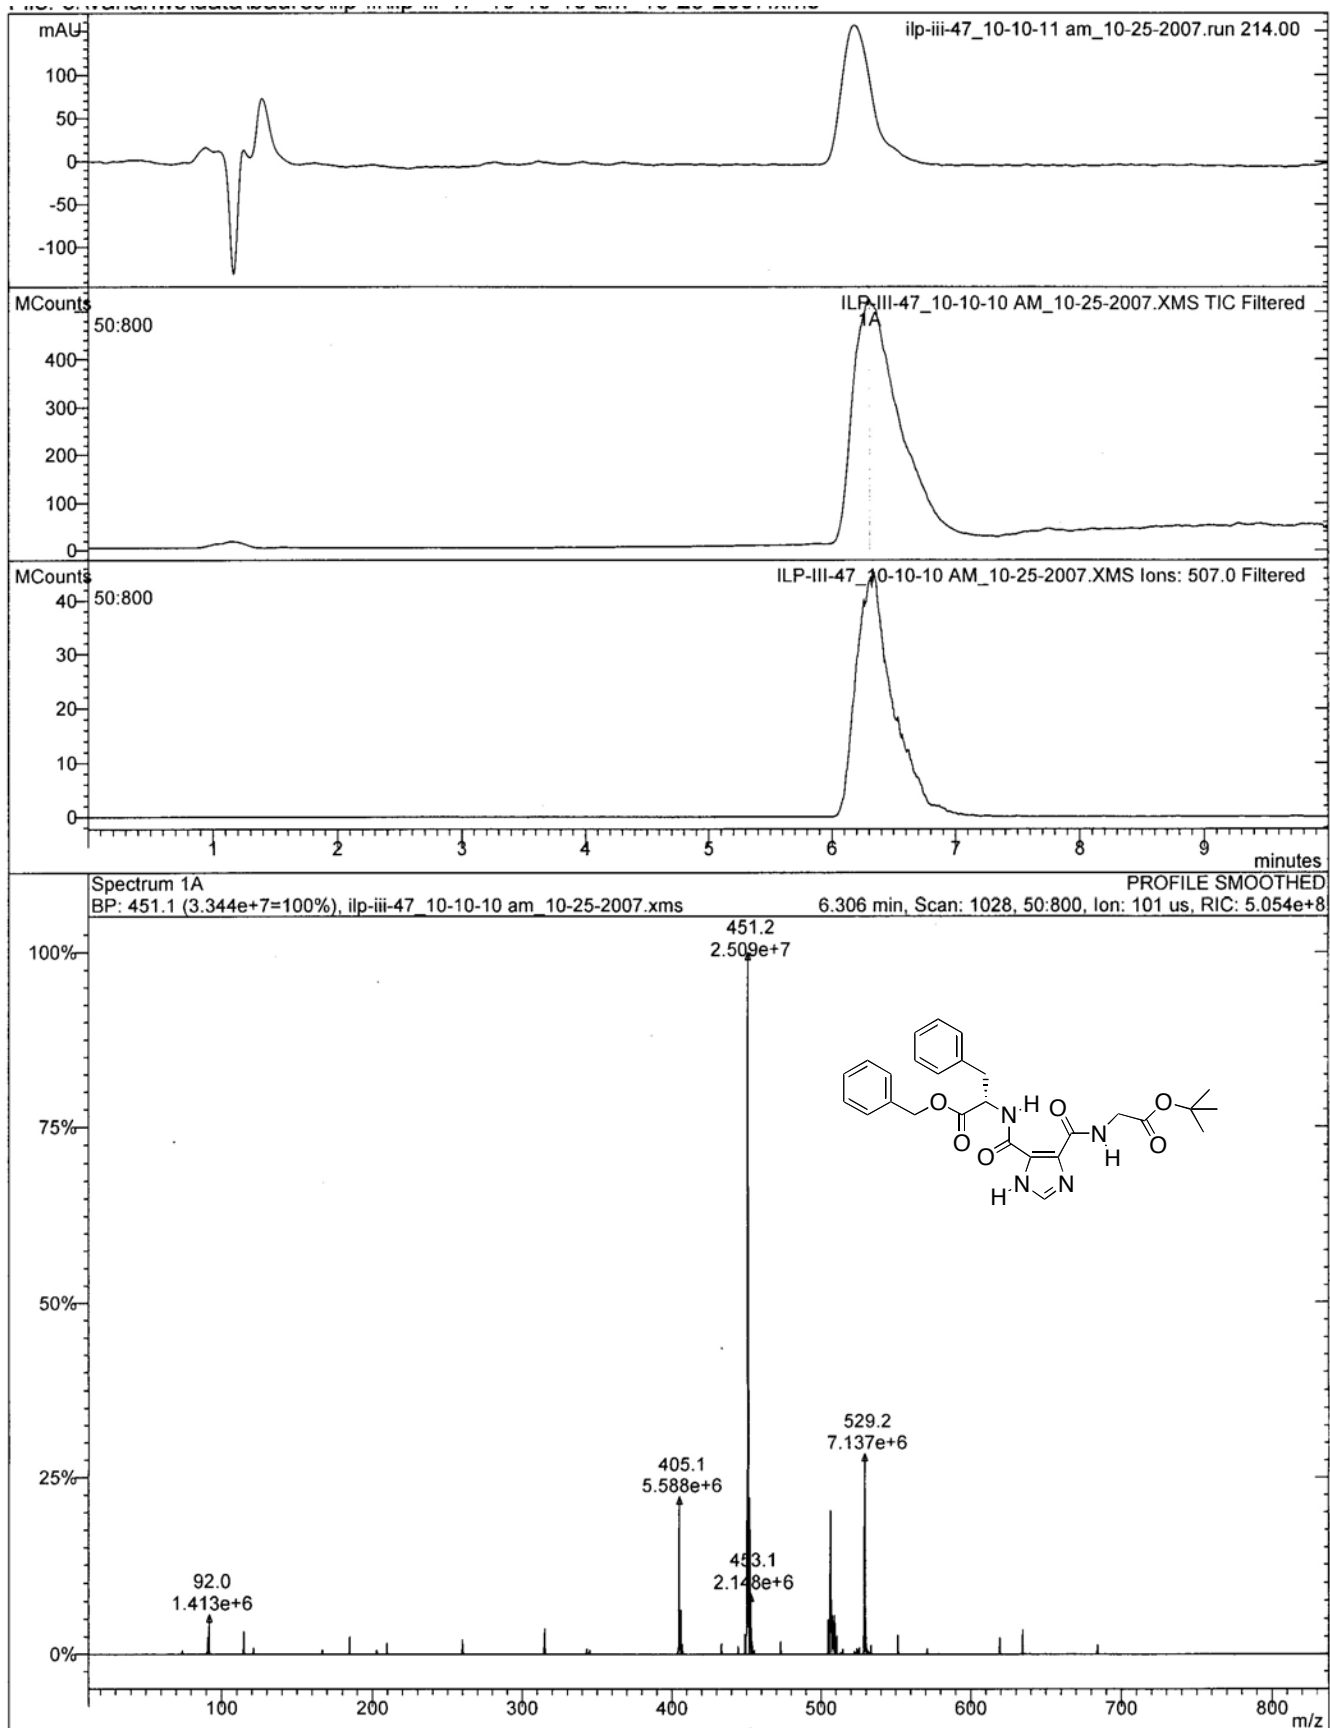

Figure S16. LC/MS data for 4{16}.



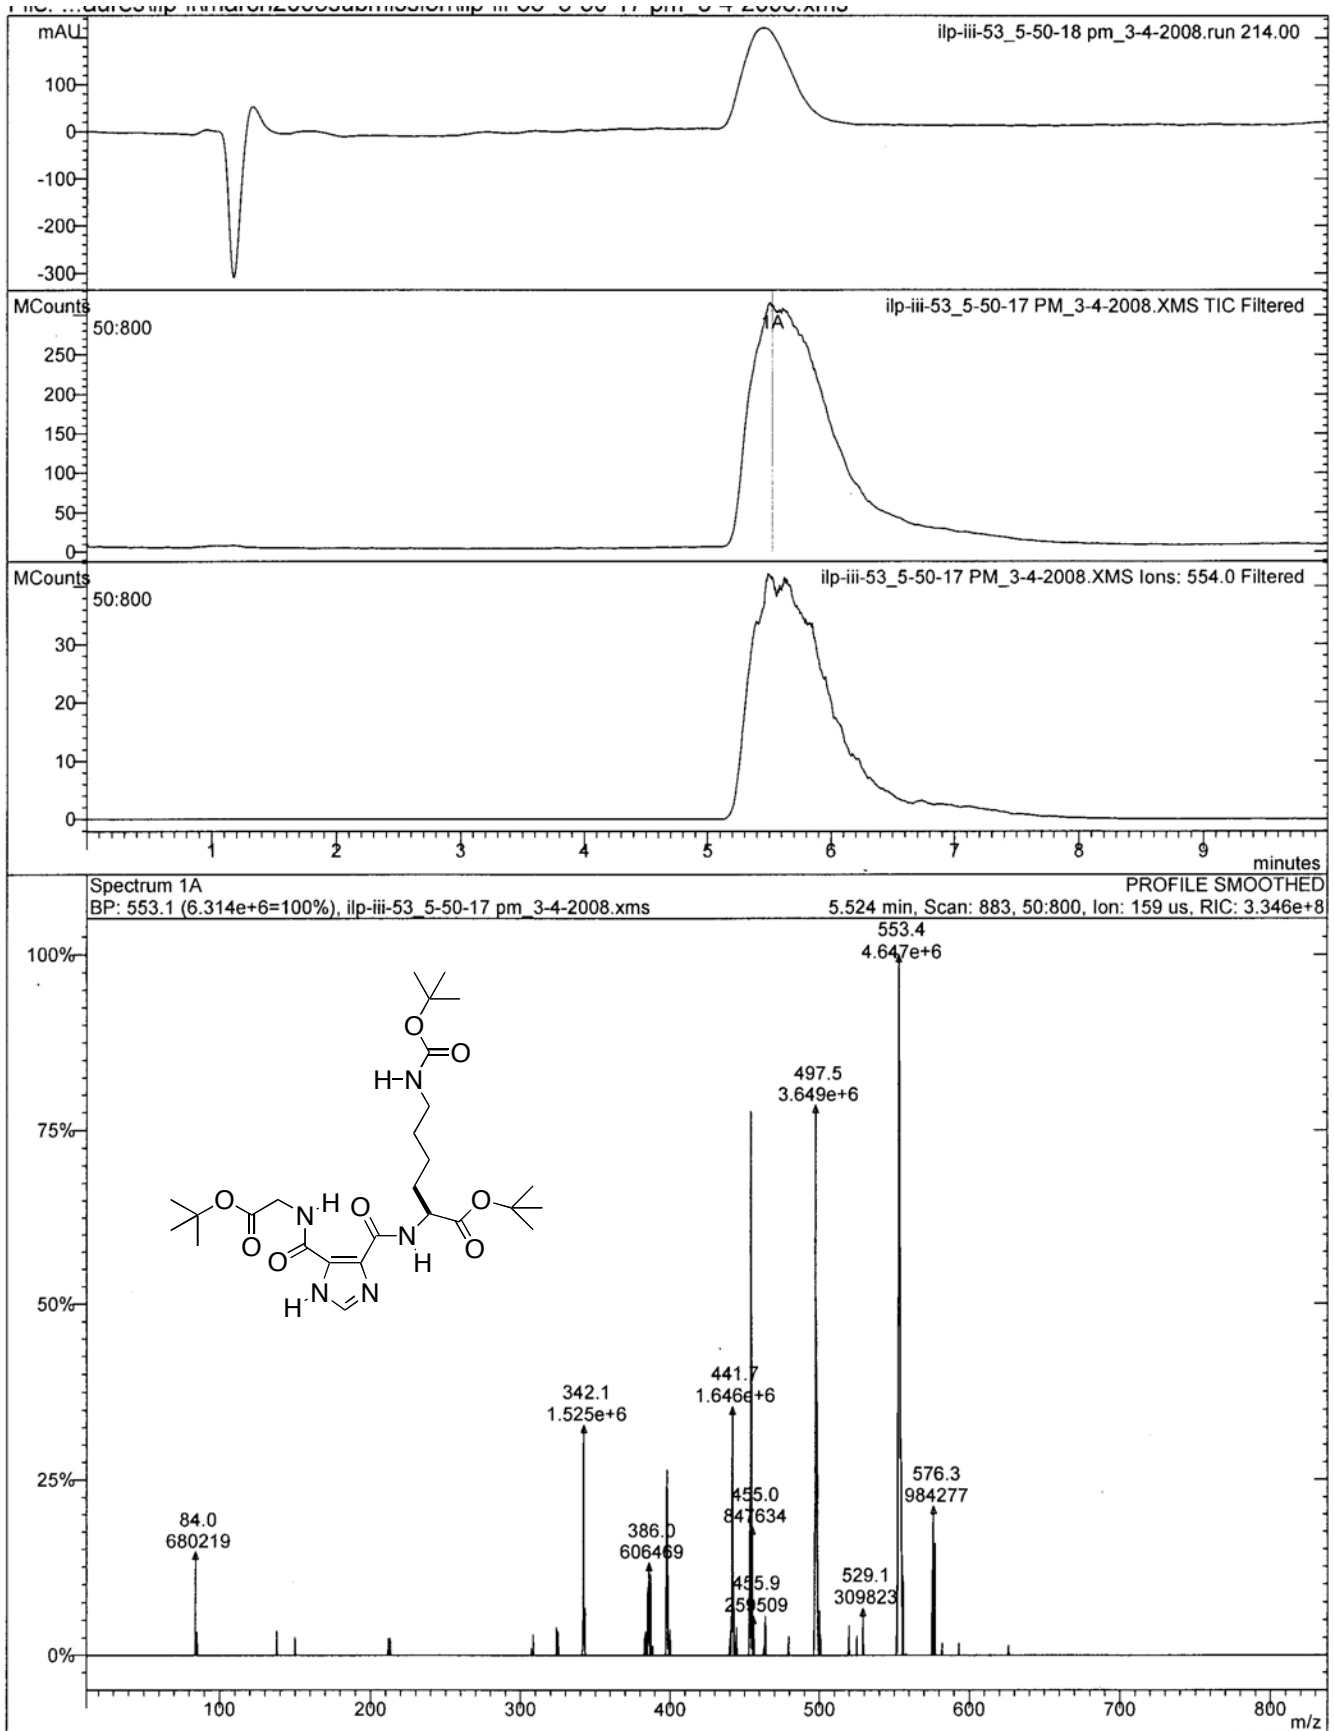

Figure S17. LC/MS data for 4{17}.

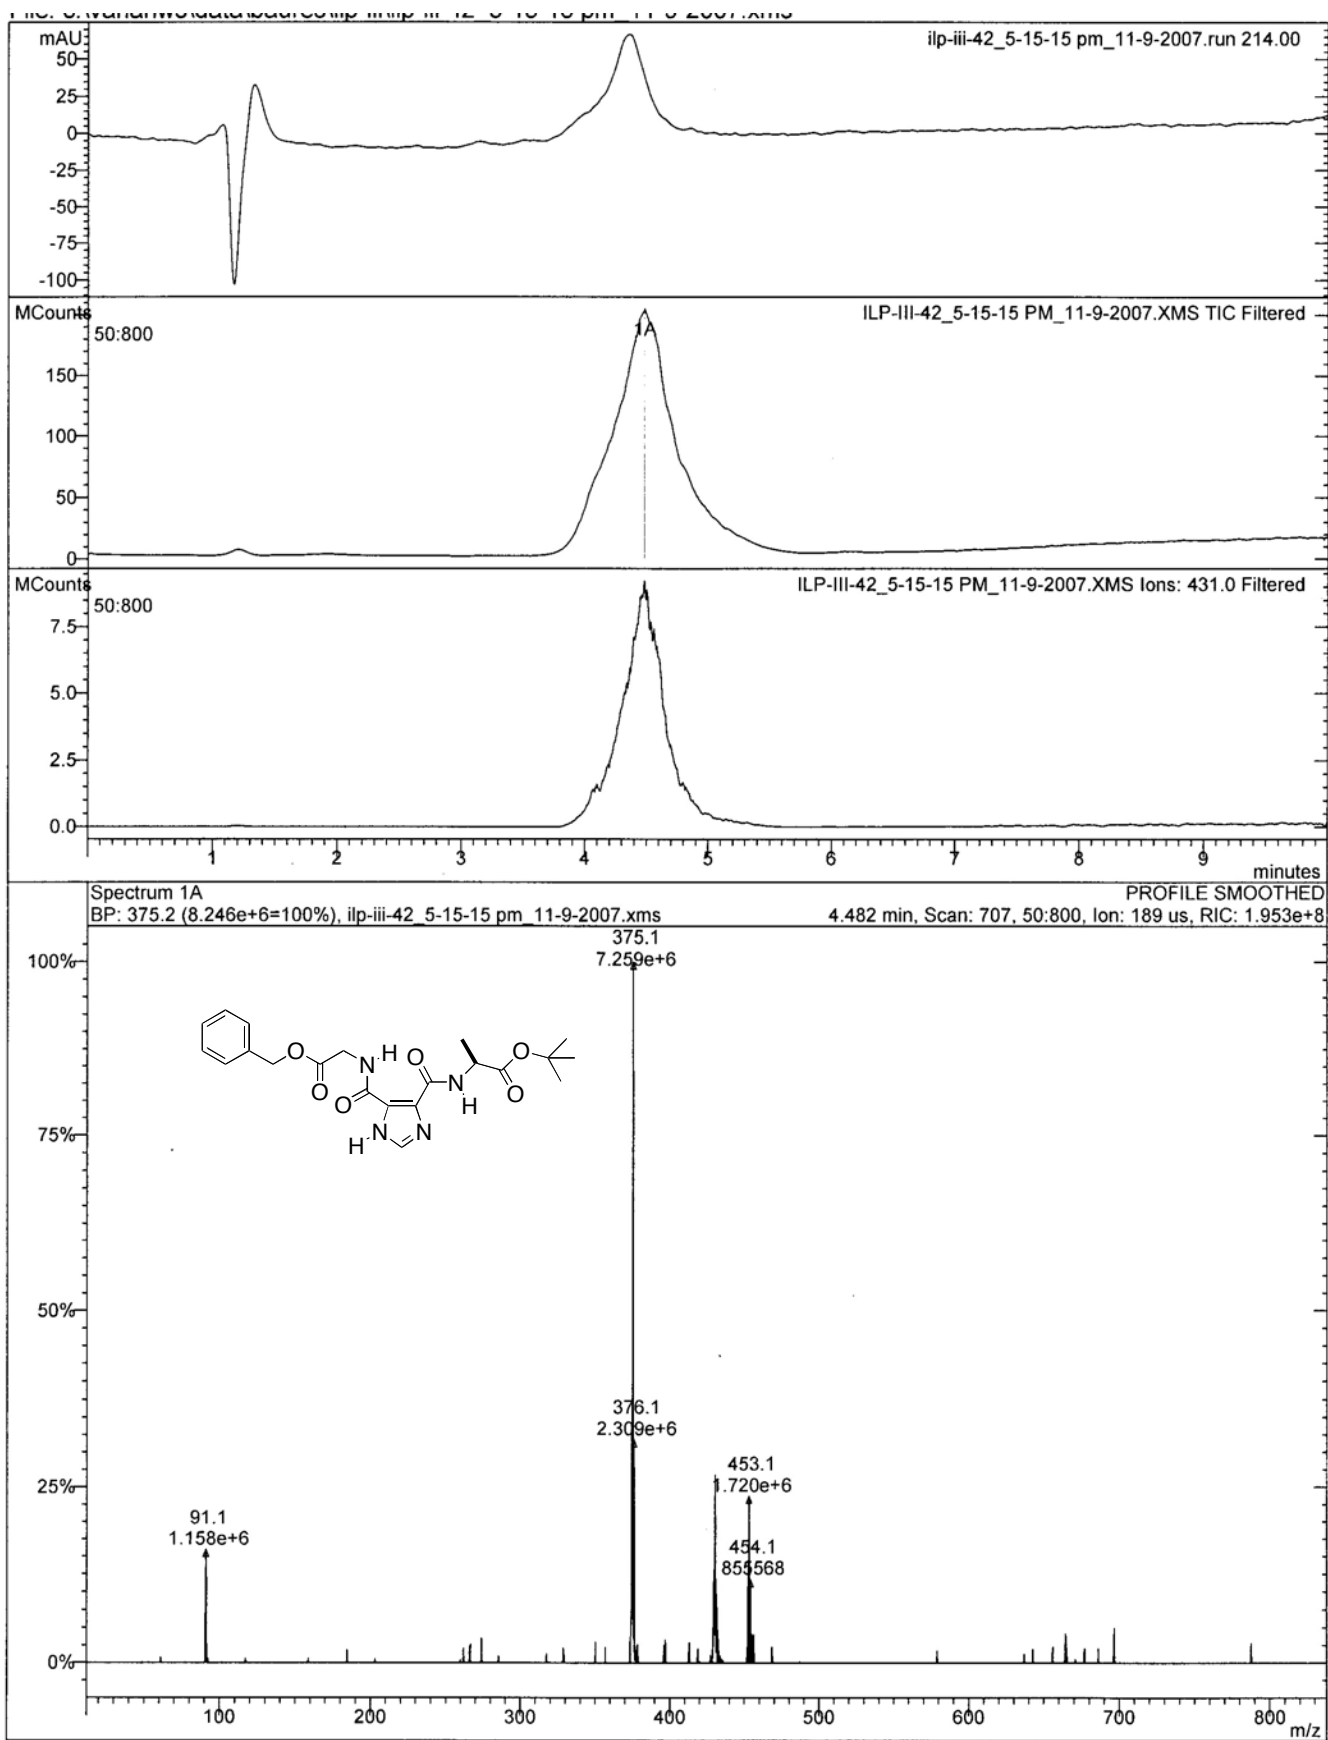

Figure S18. LC/MS data for 4{18}.

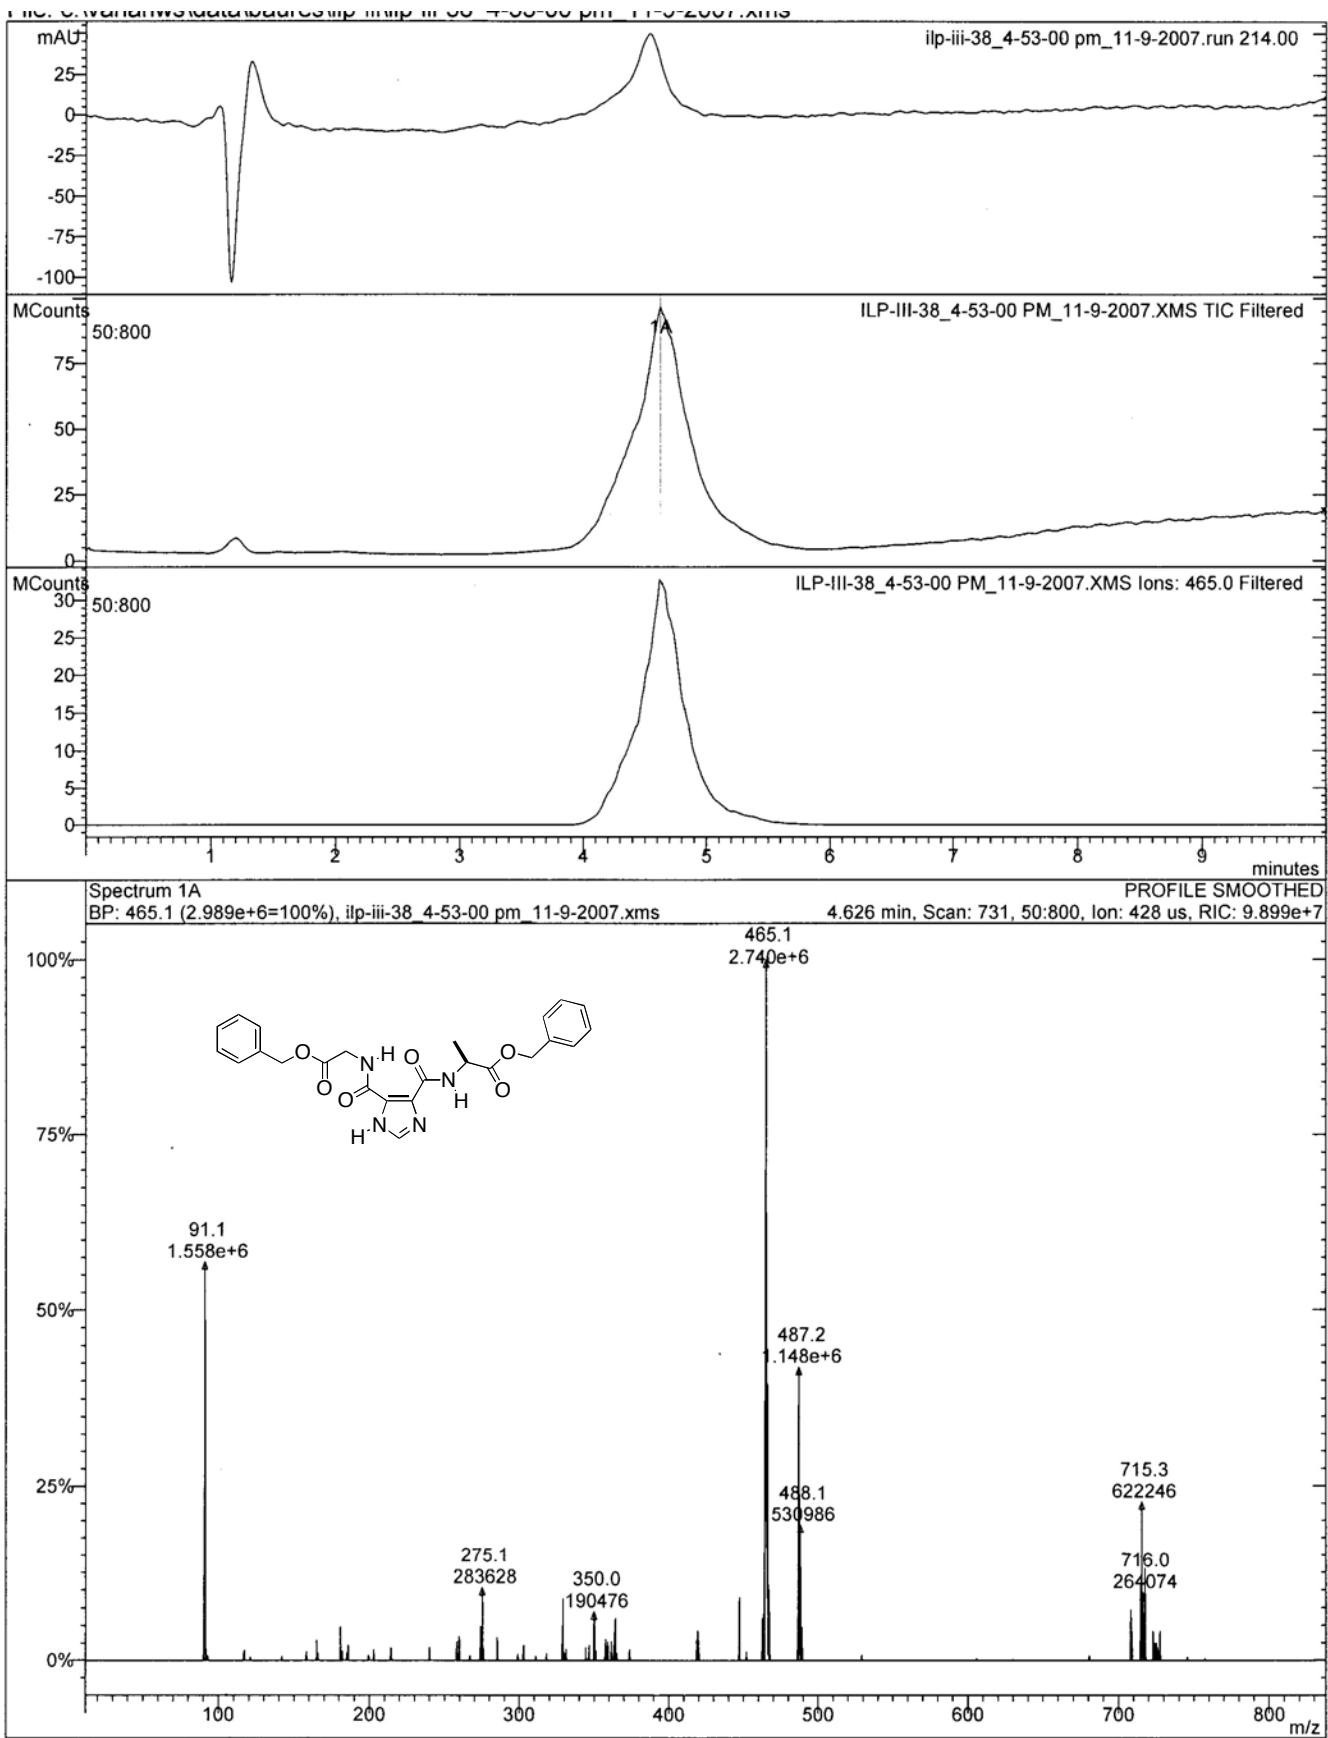

Figure S19. LC/MS data for 4{19}.

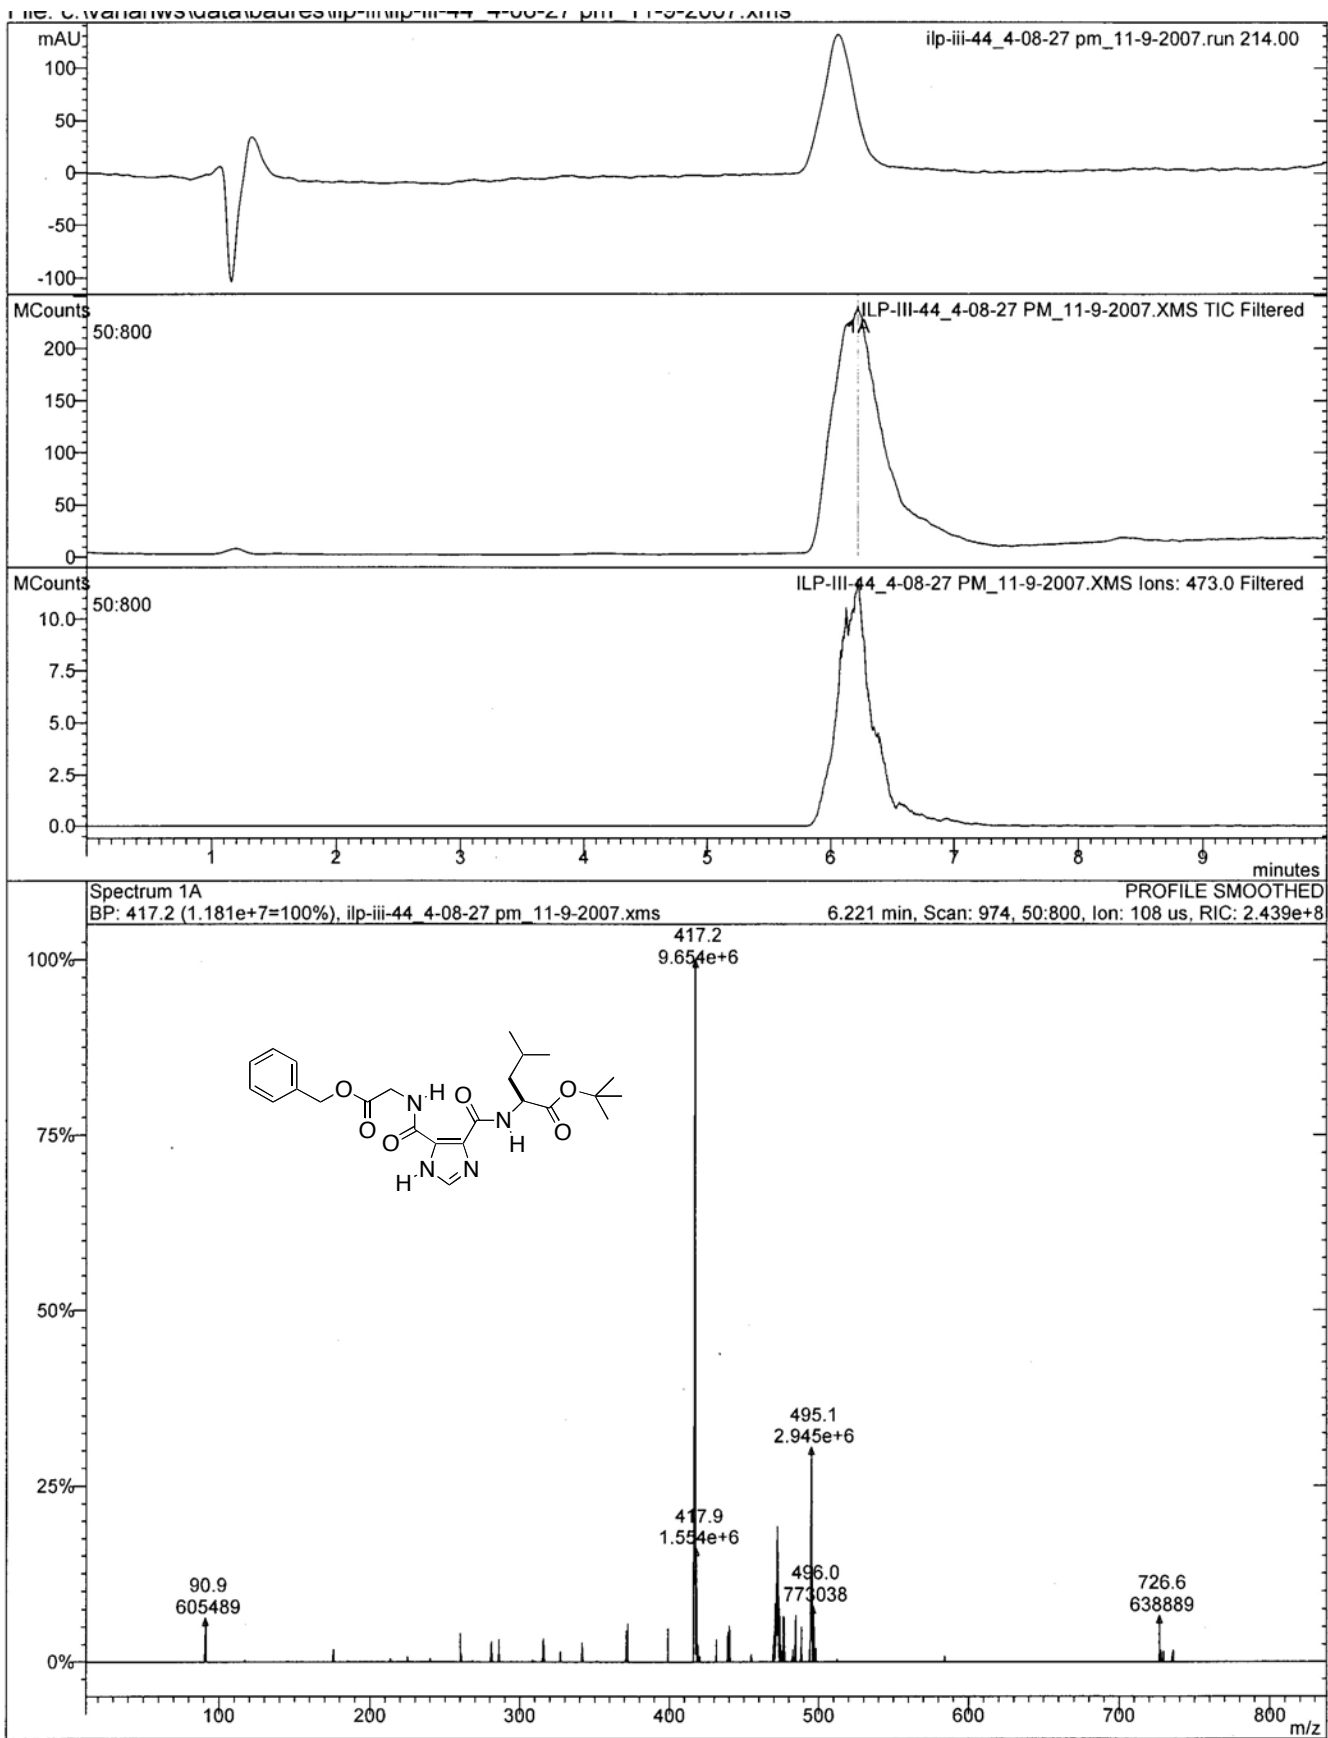

Figure S20. LC/MS data for 4{20}.

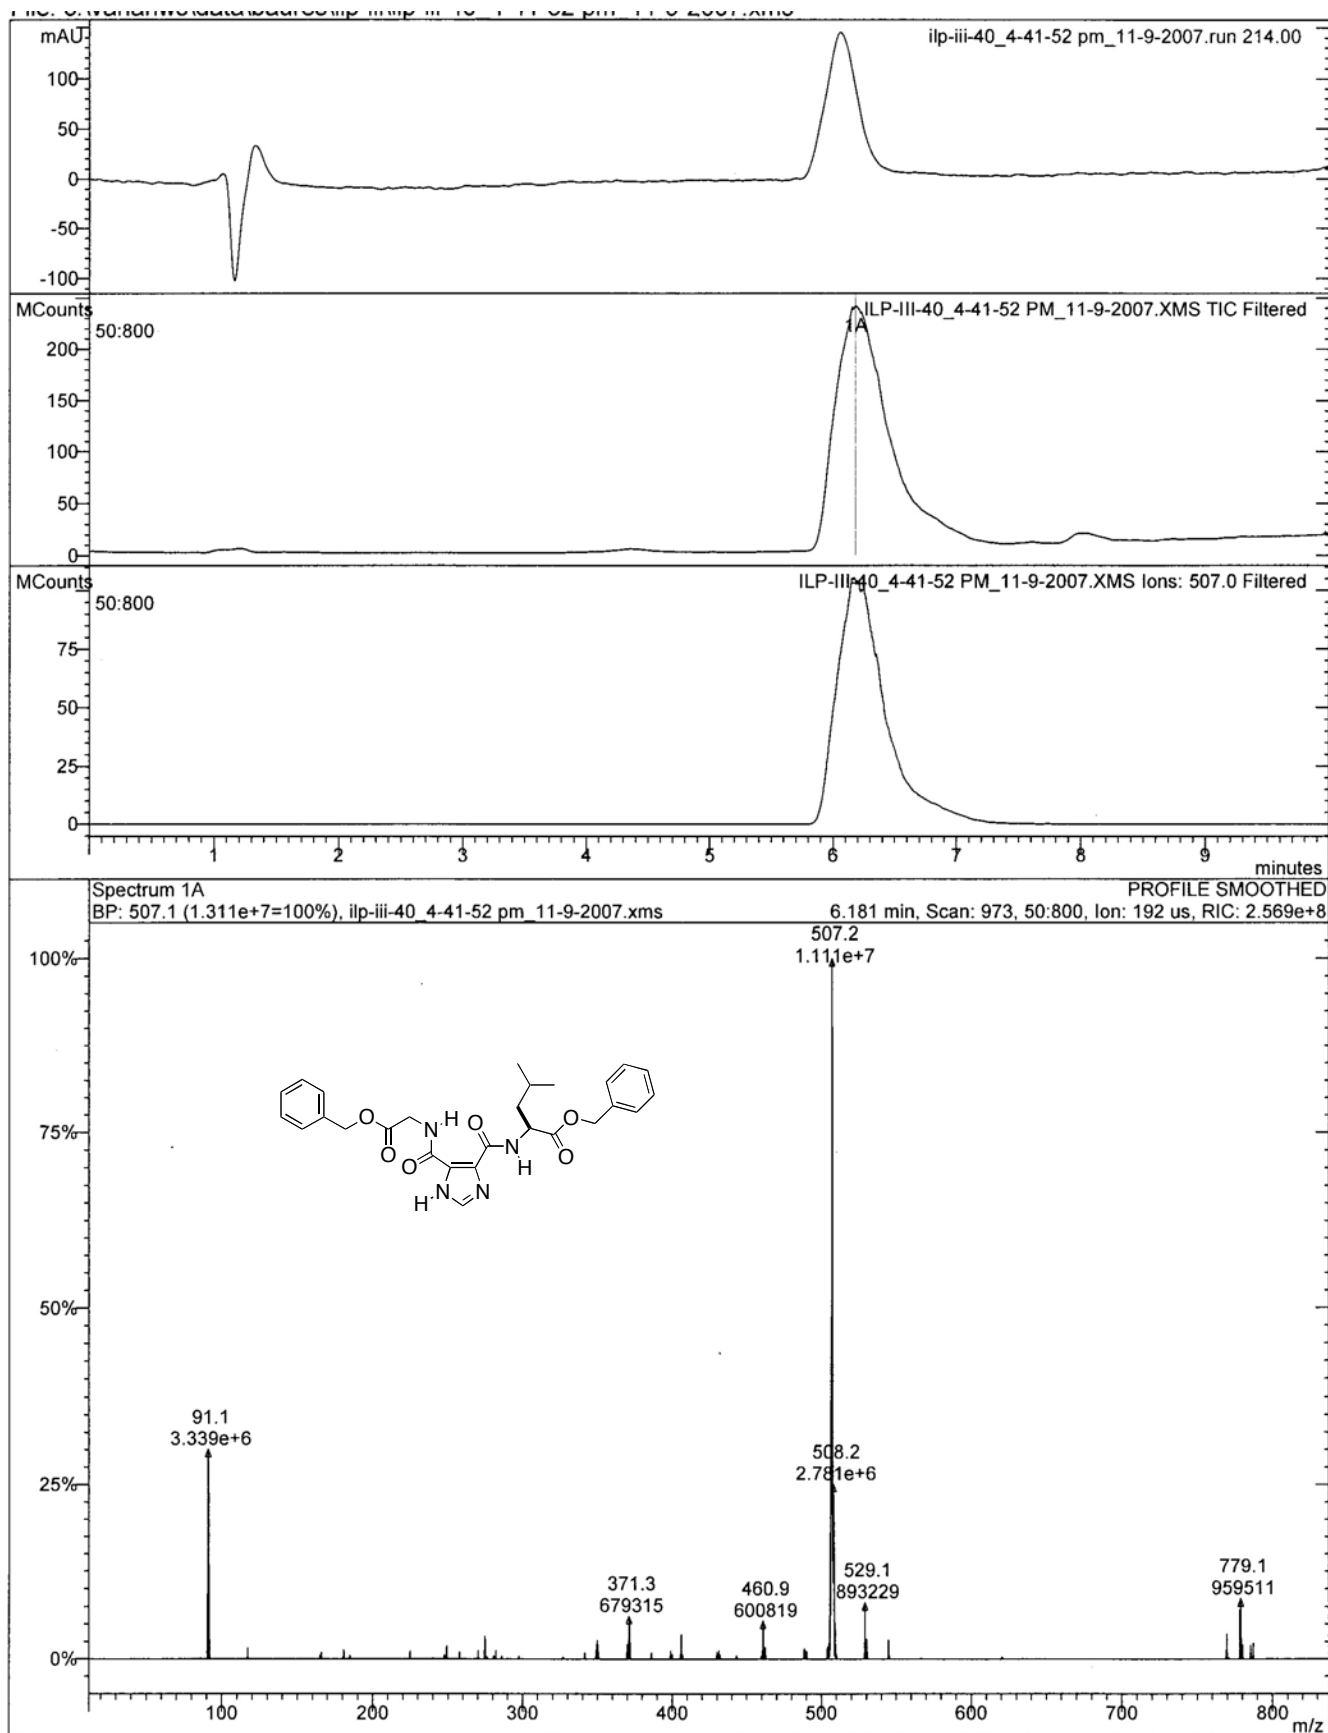

Figure S21. LC/MS data for 4{21}.

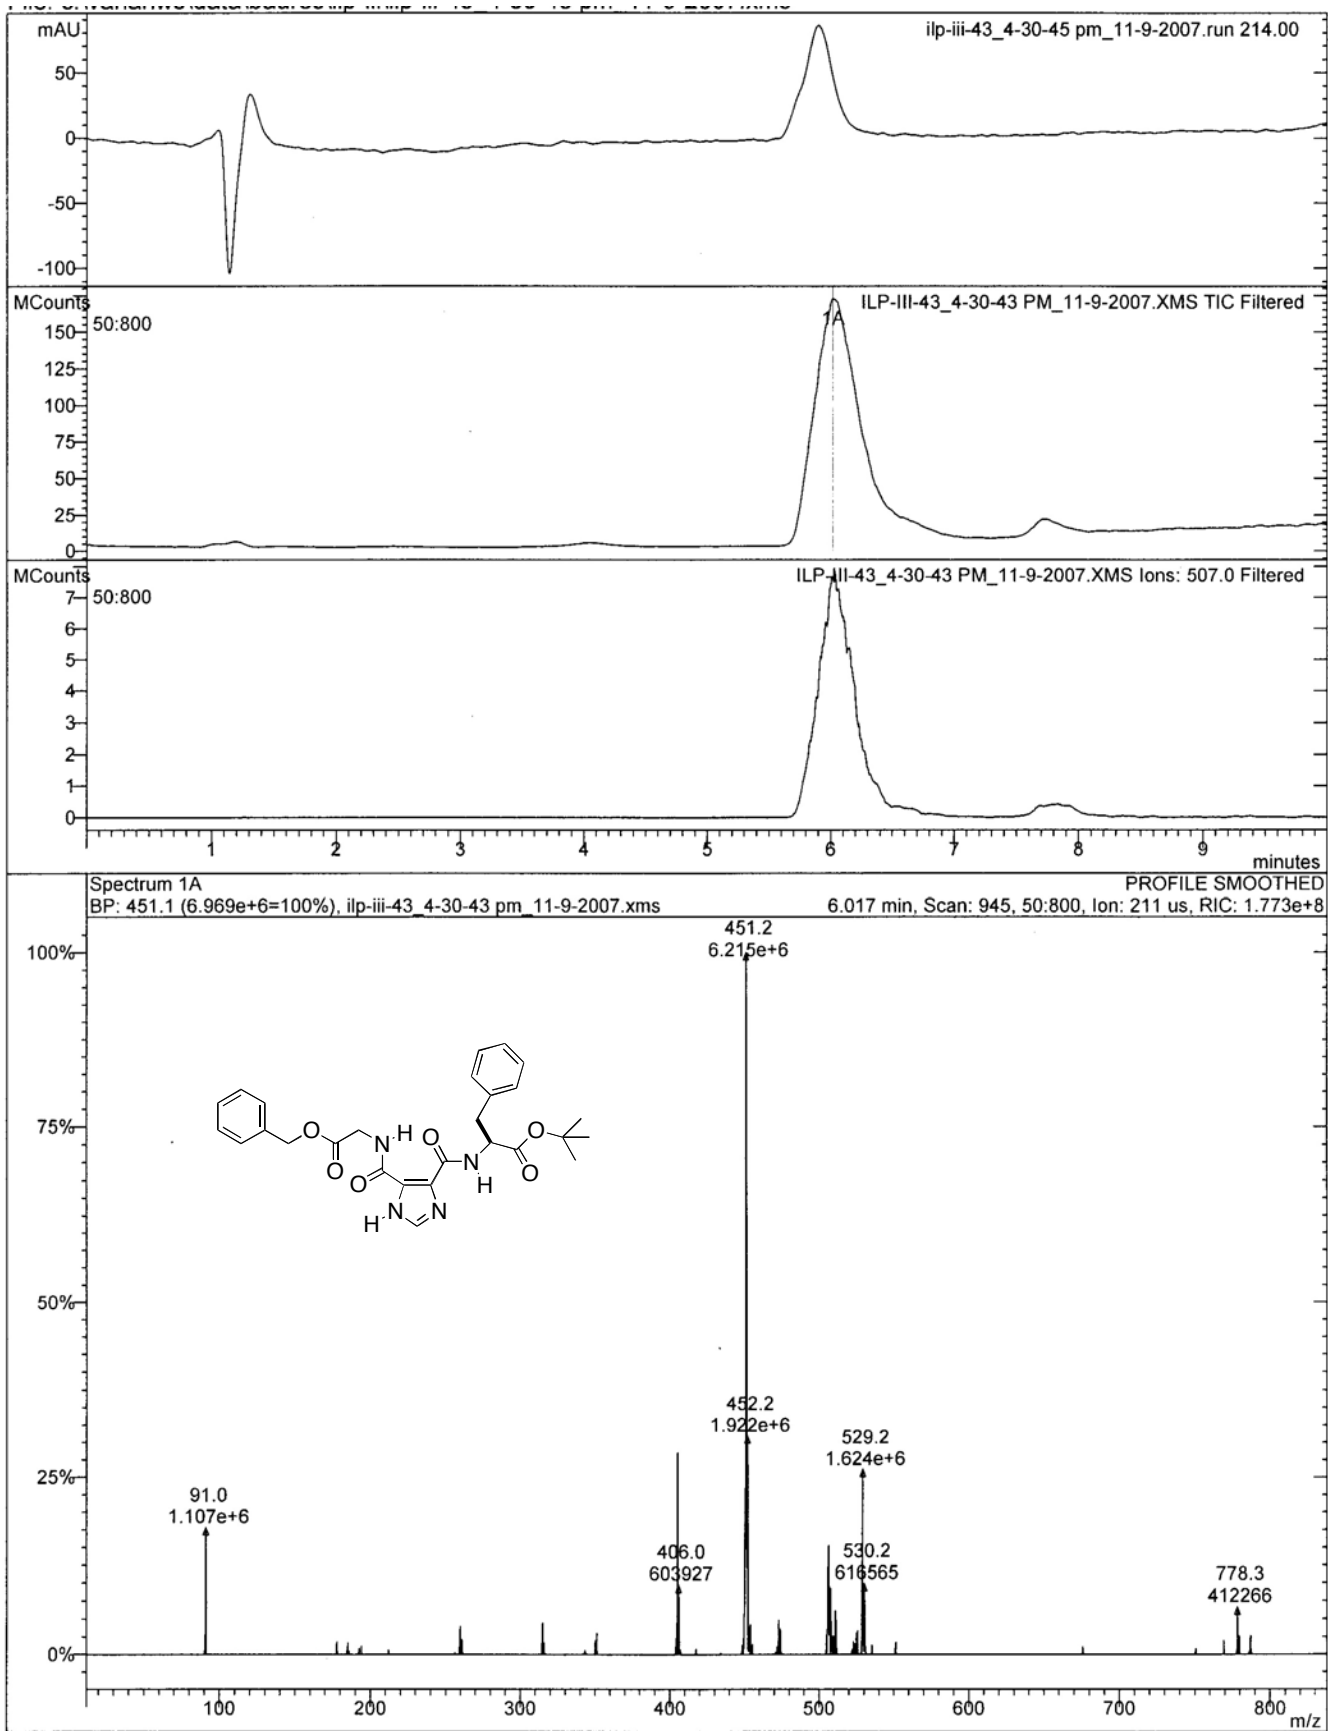

Figure S22. LC/MS data for 4{22}.

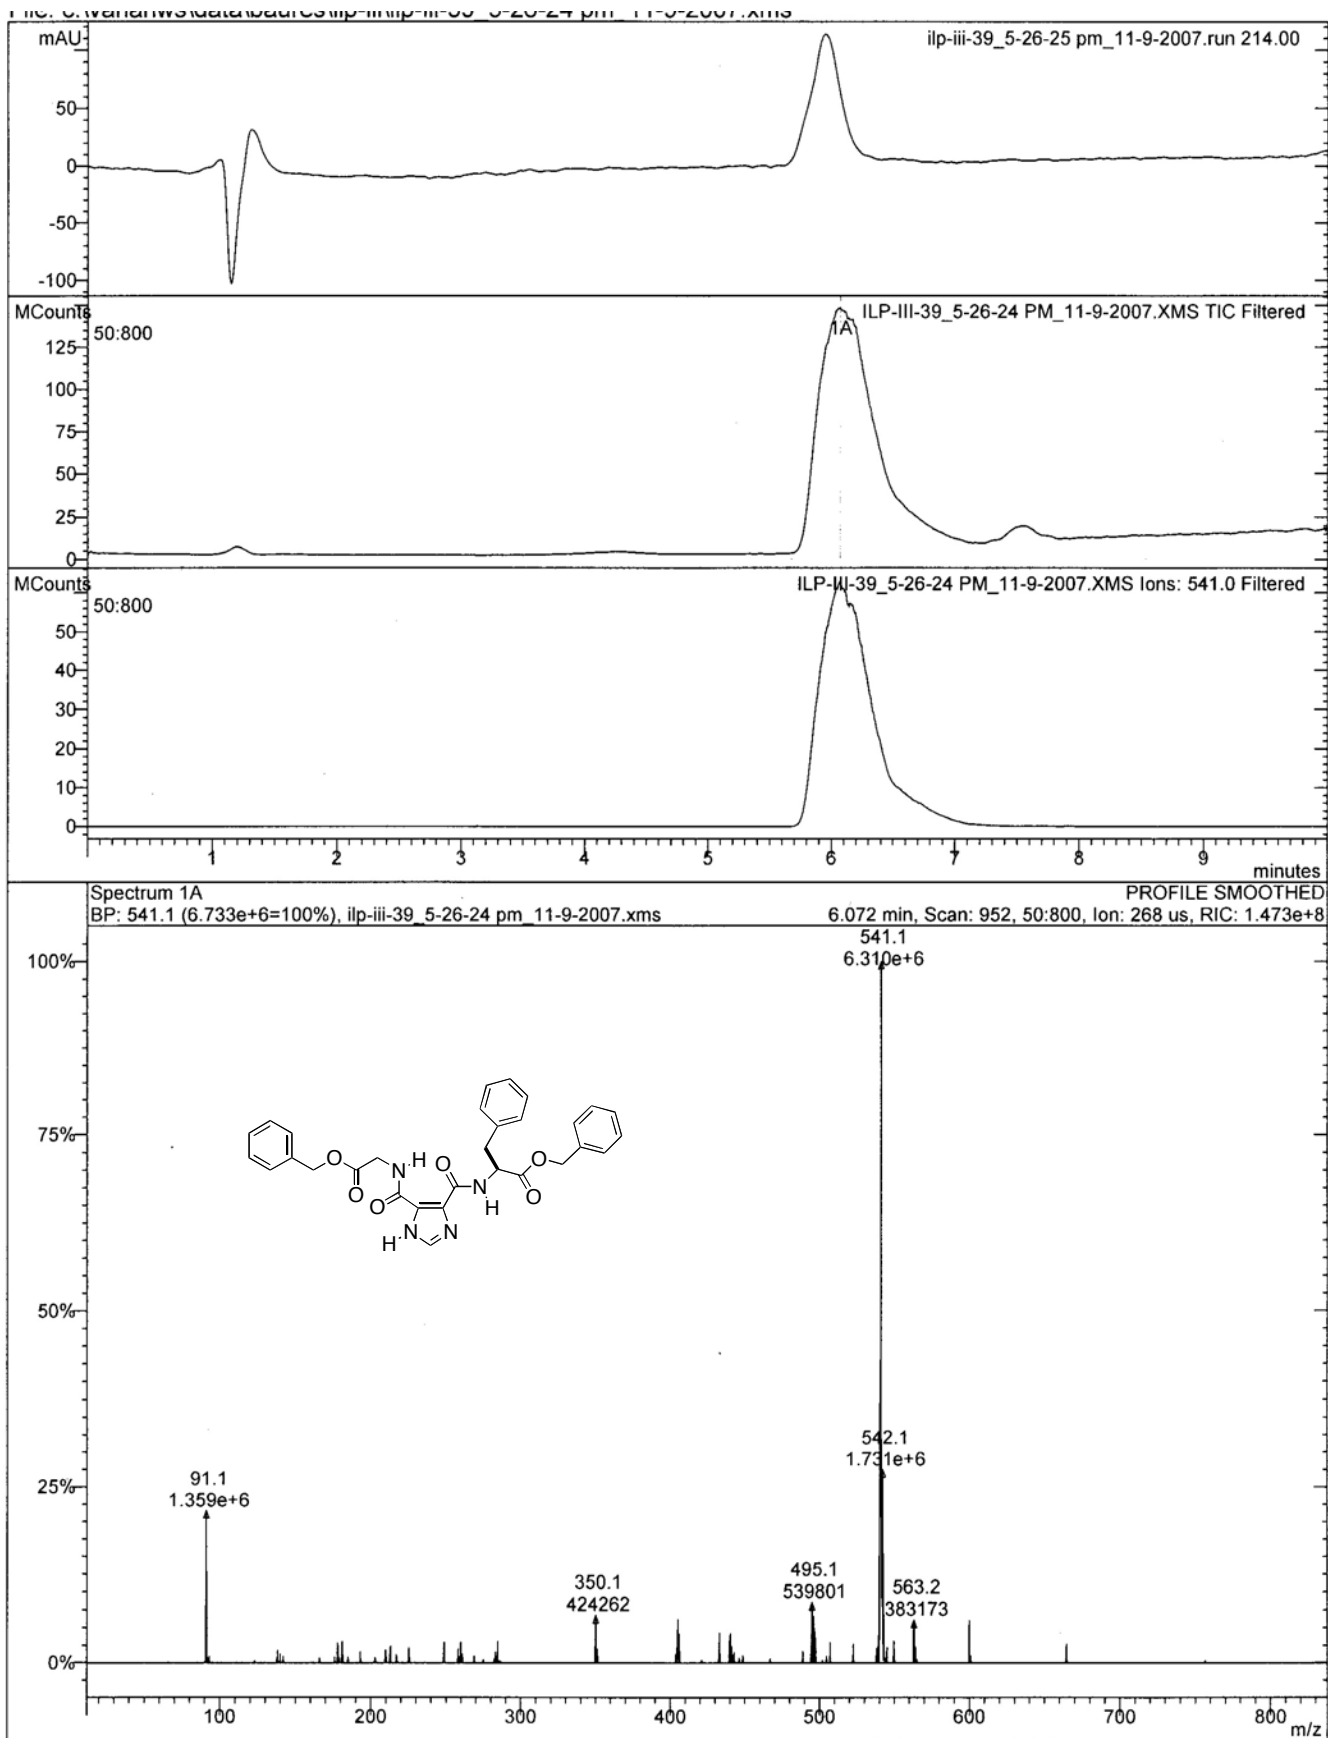

Figure S23. LC/MS data for 4{23}.

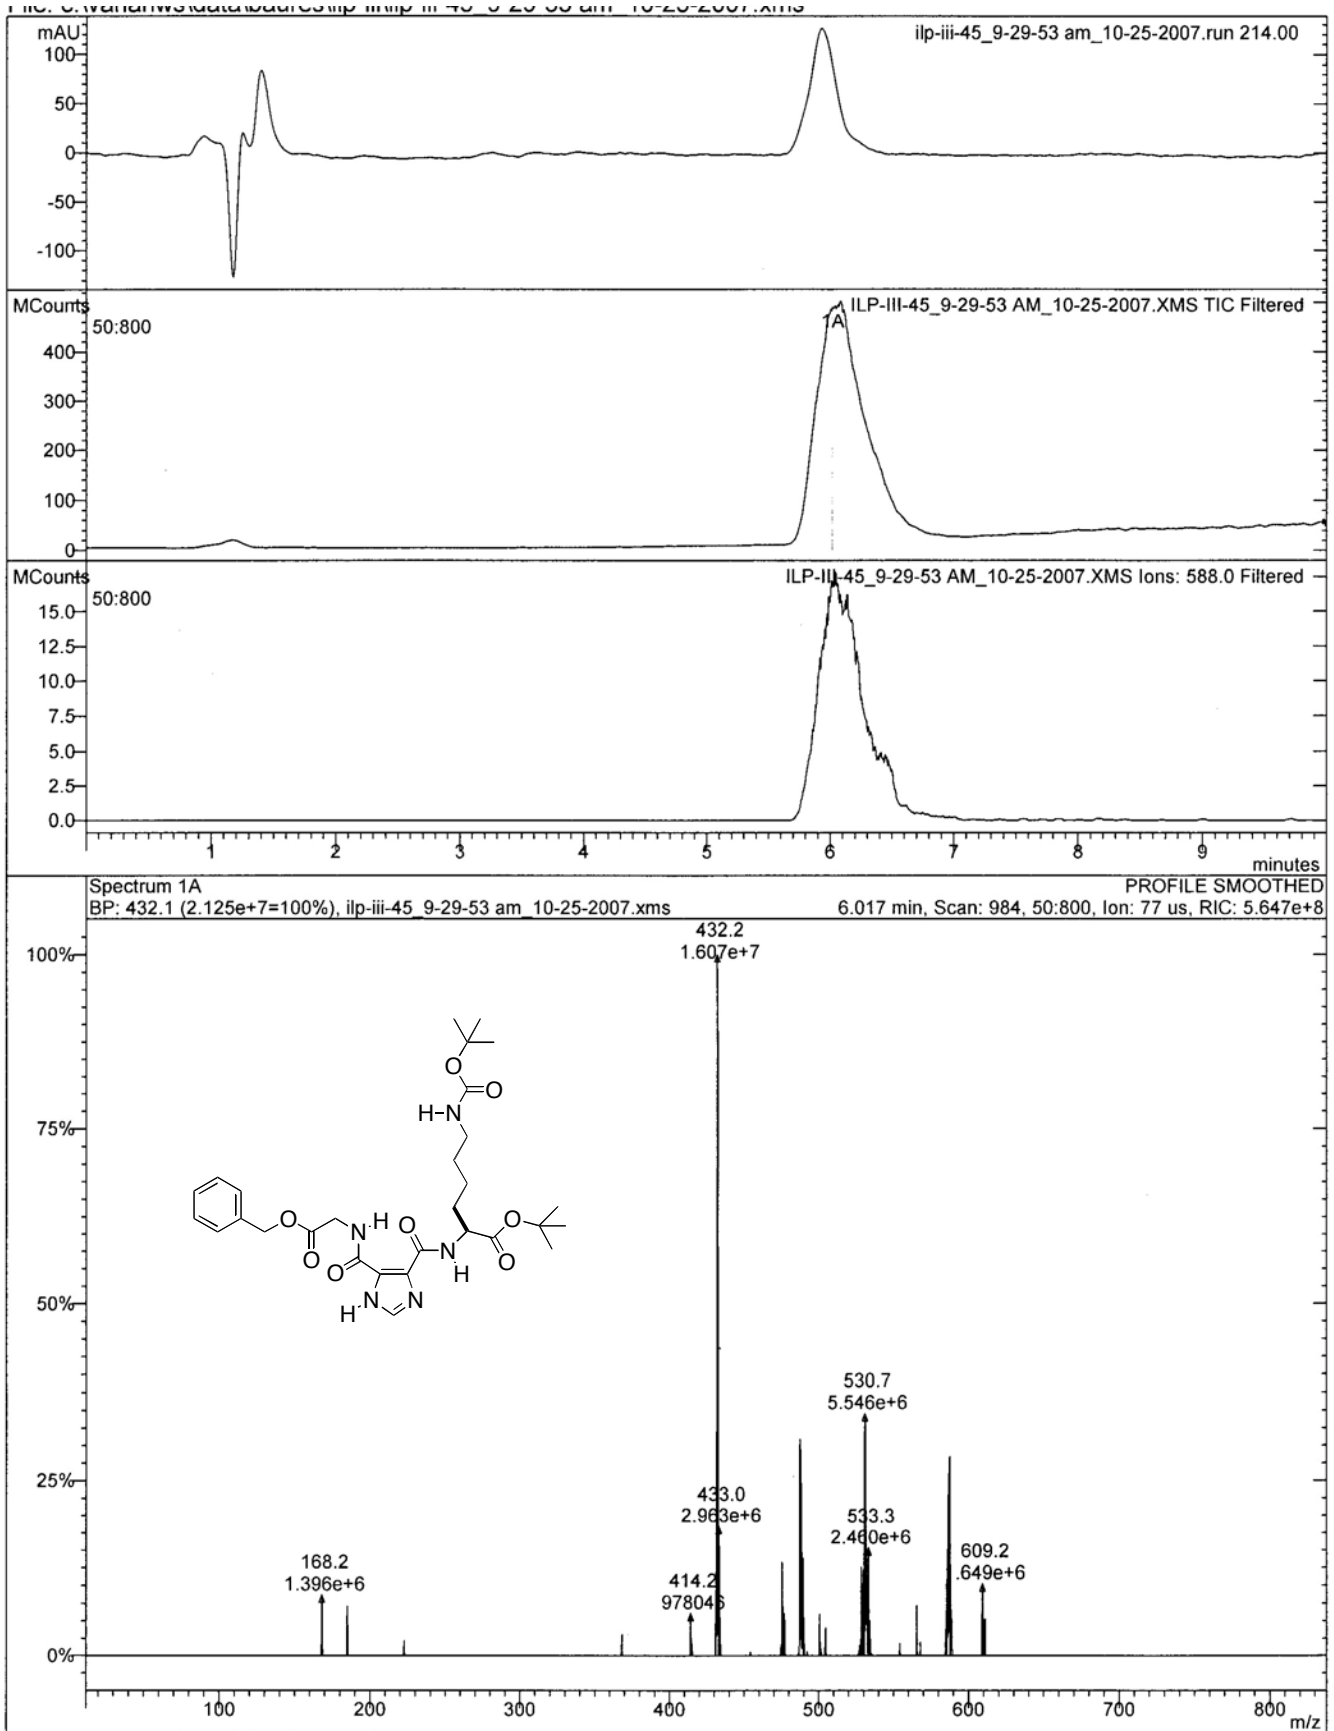

Figure S24. LC/MS data for 4{24}.



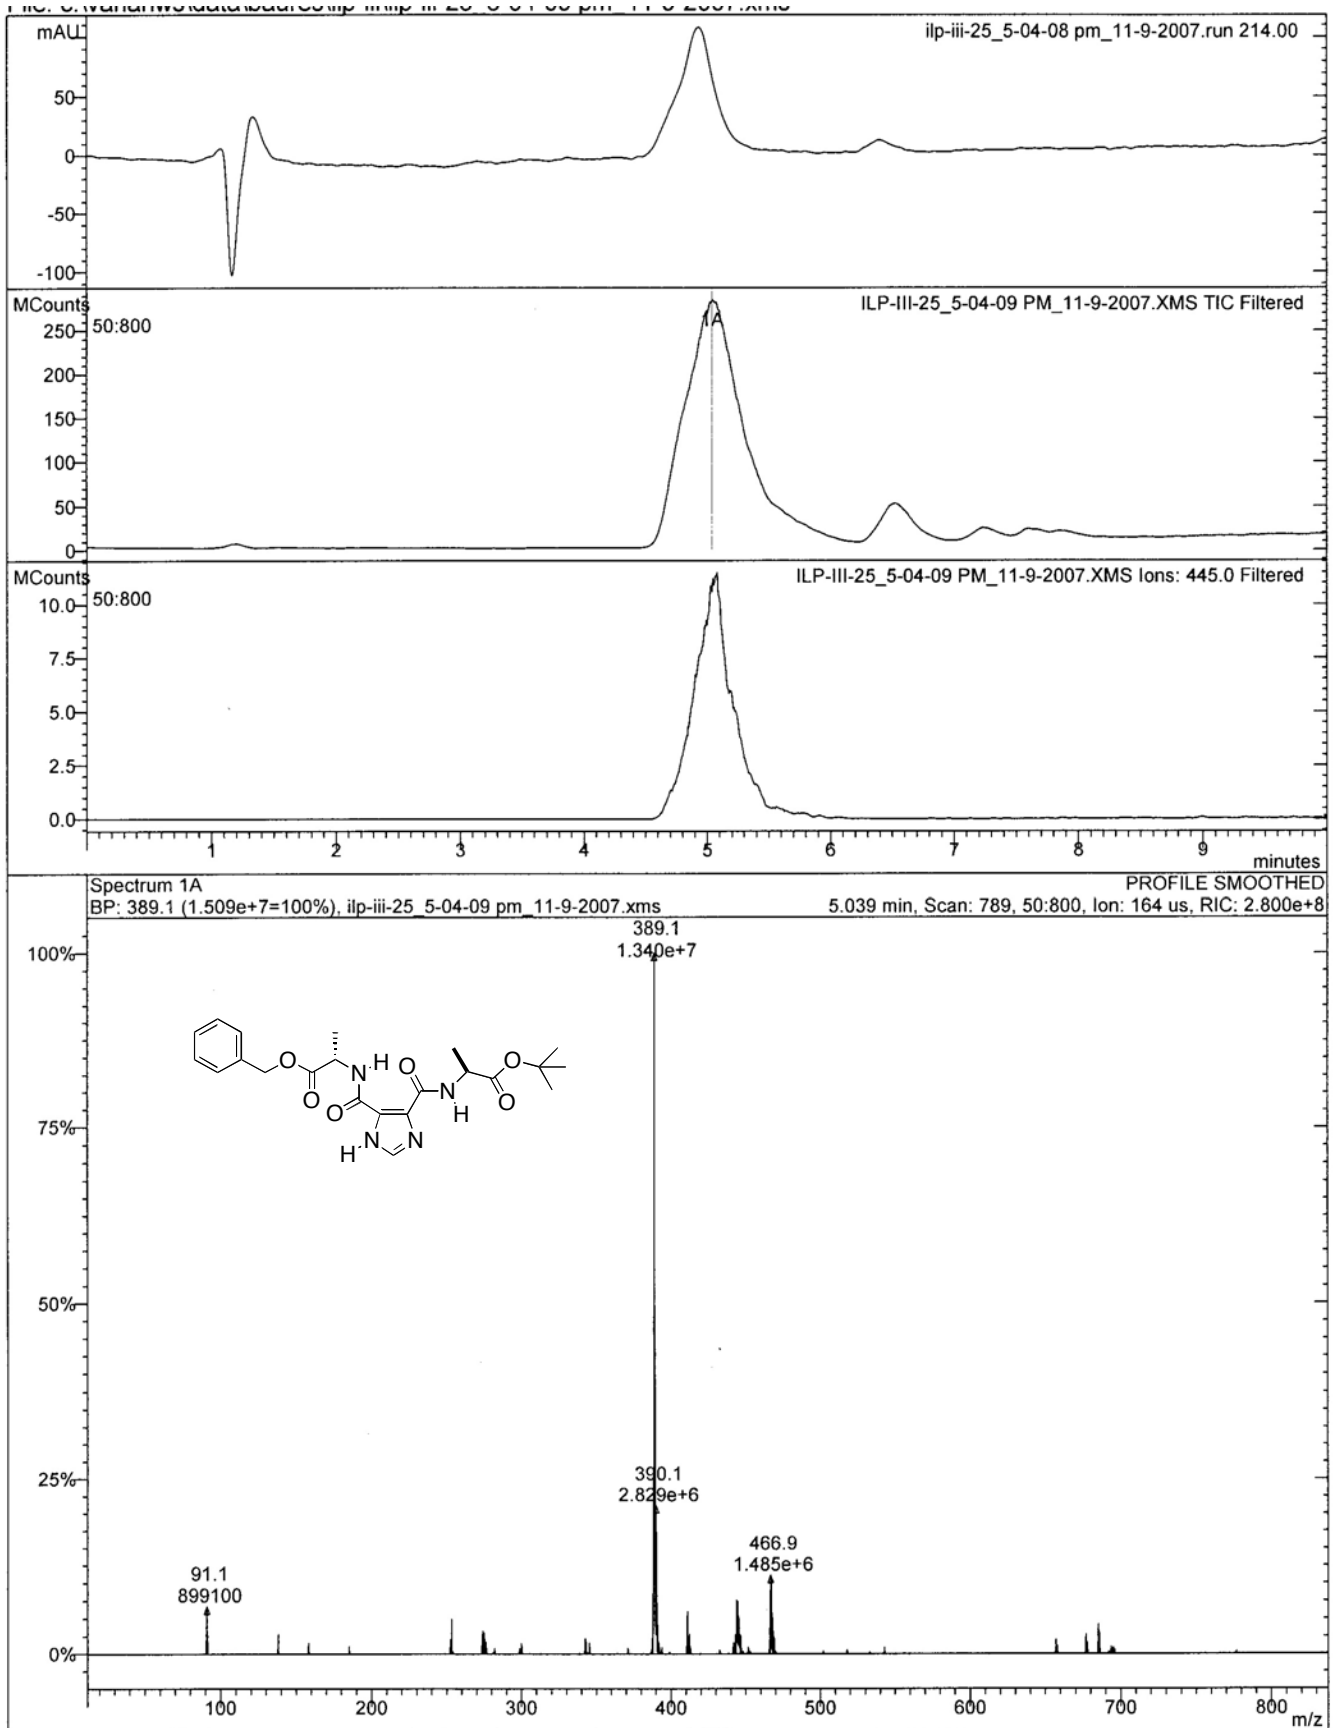

Figure S25. LC/MS data for 4{25}.

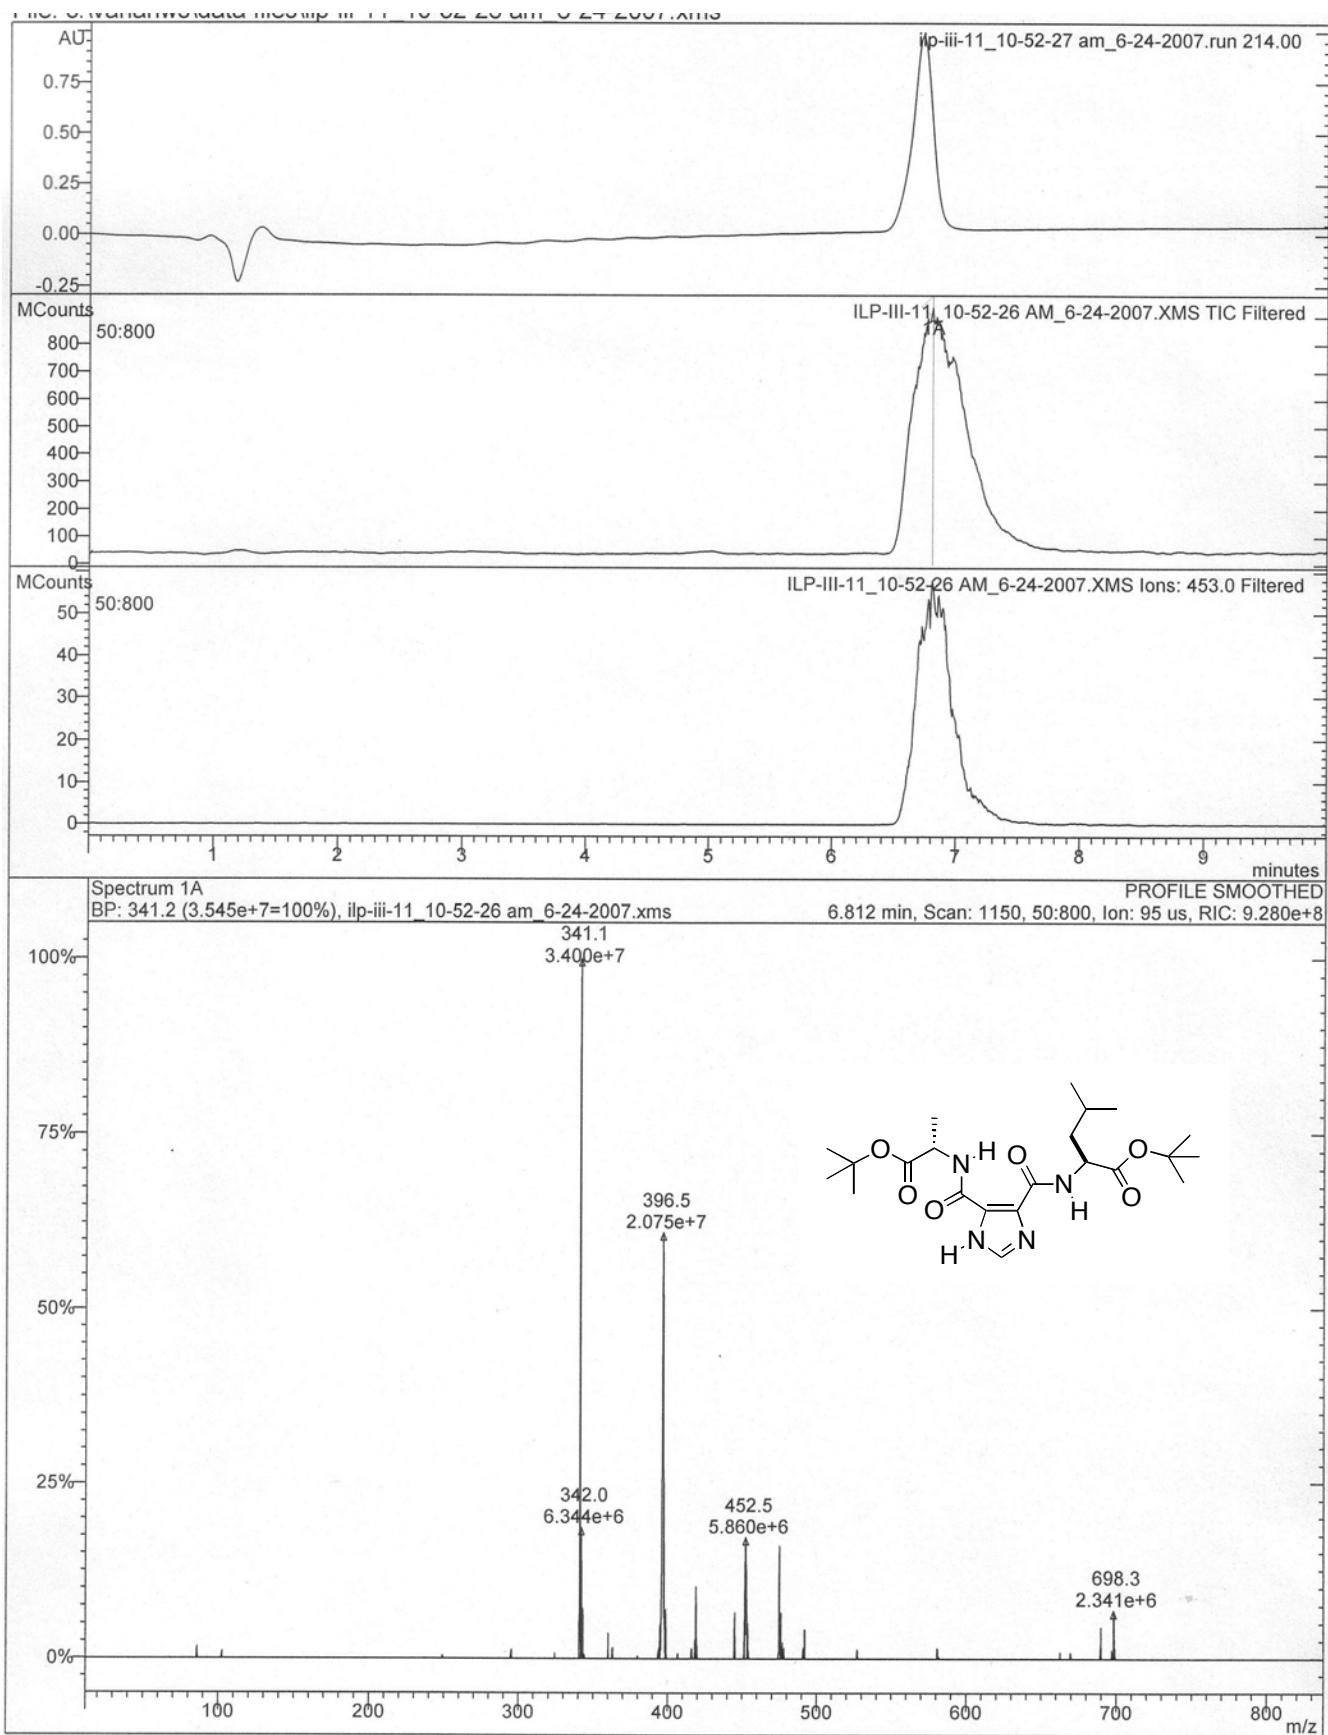

Figure S26. LC/MS data for 4{26}.

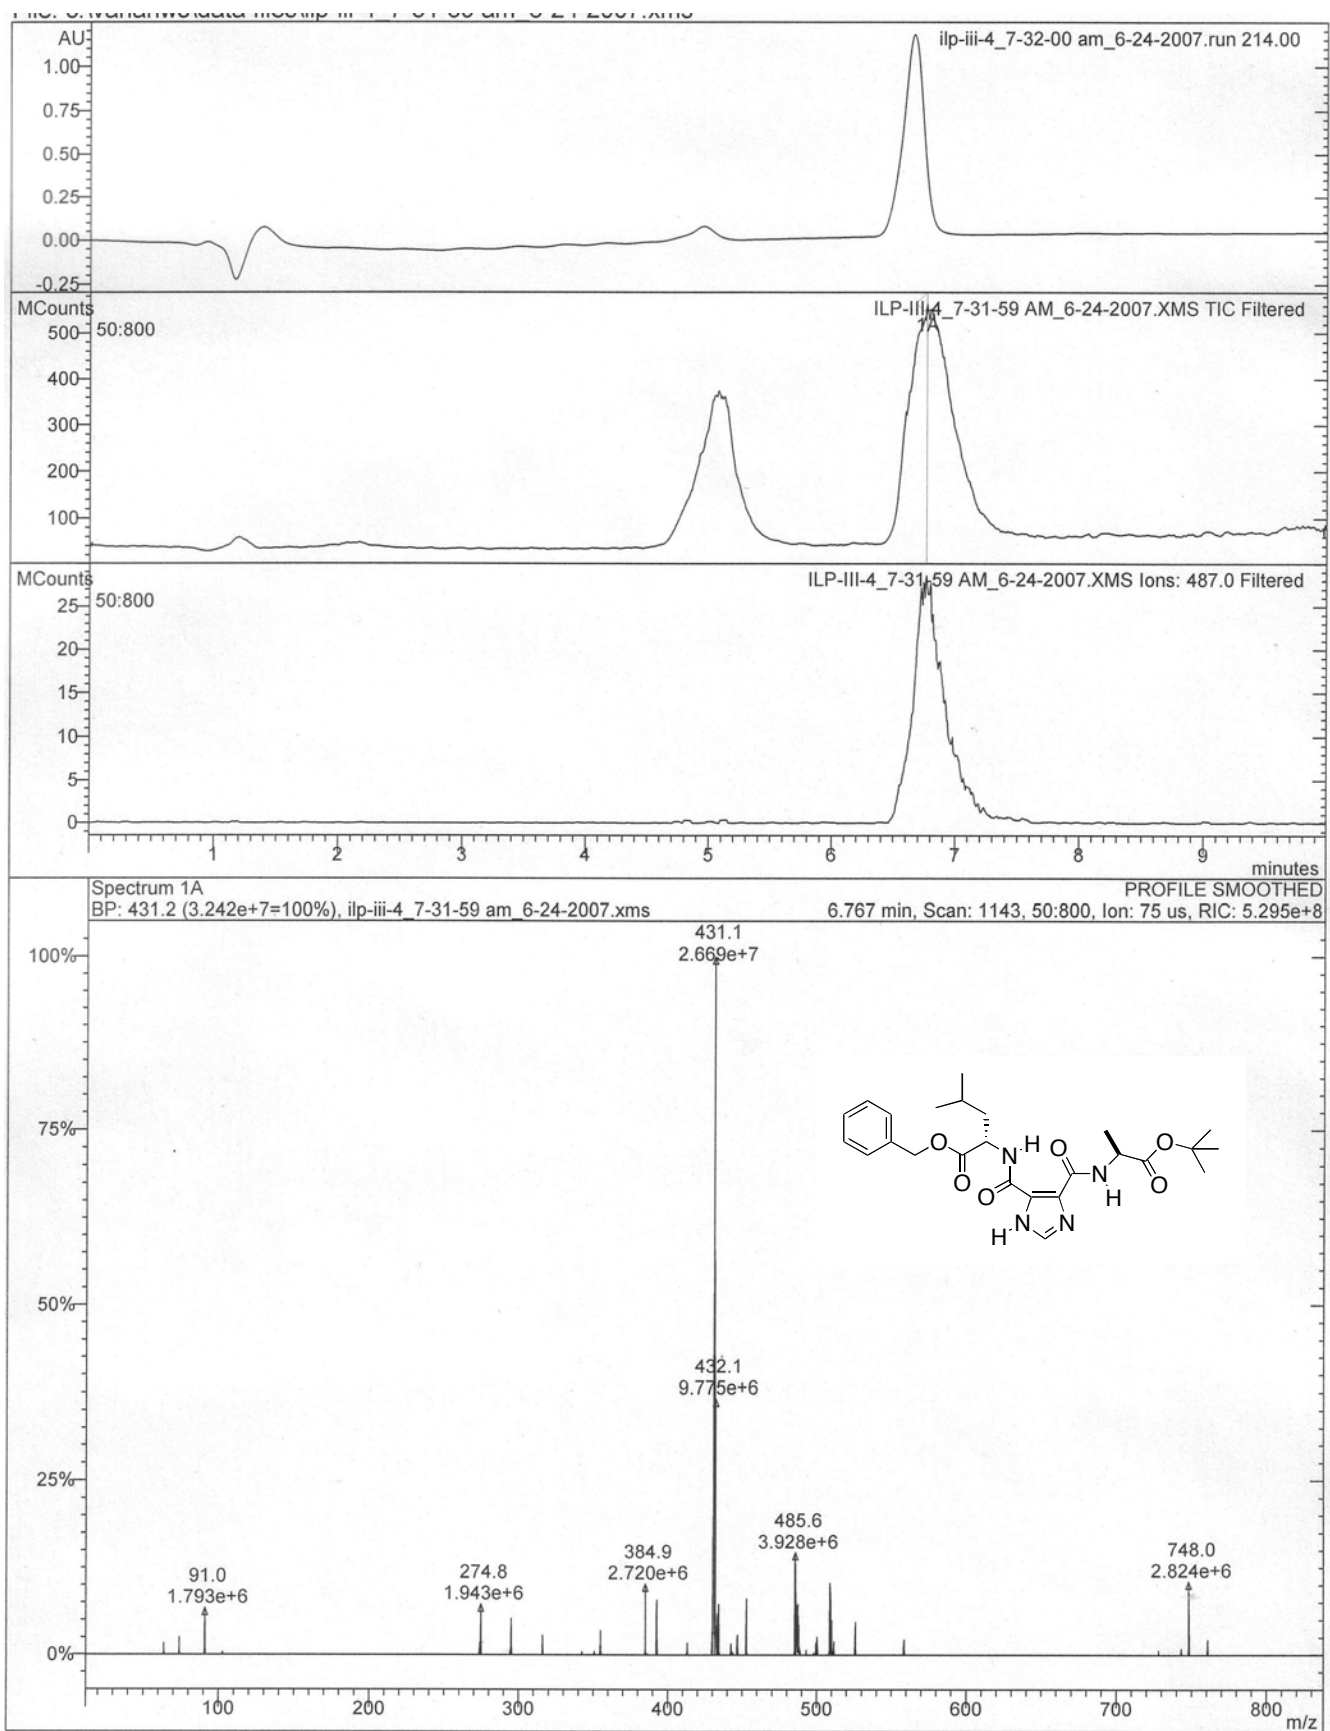

Figure S27. LC/MS data for 4{27}.

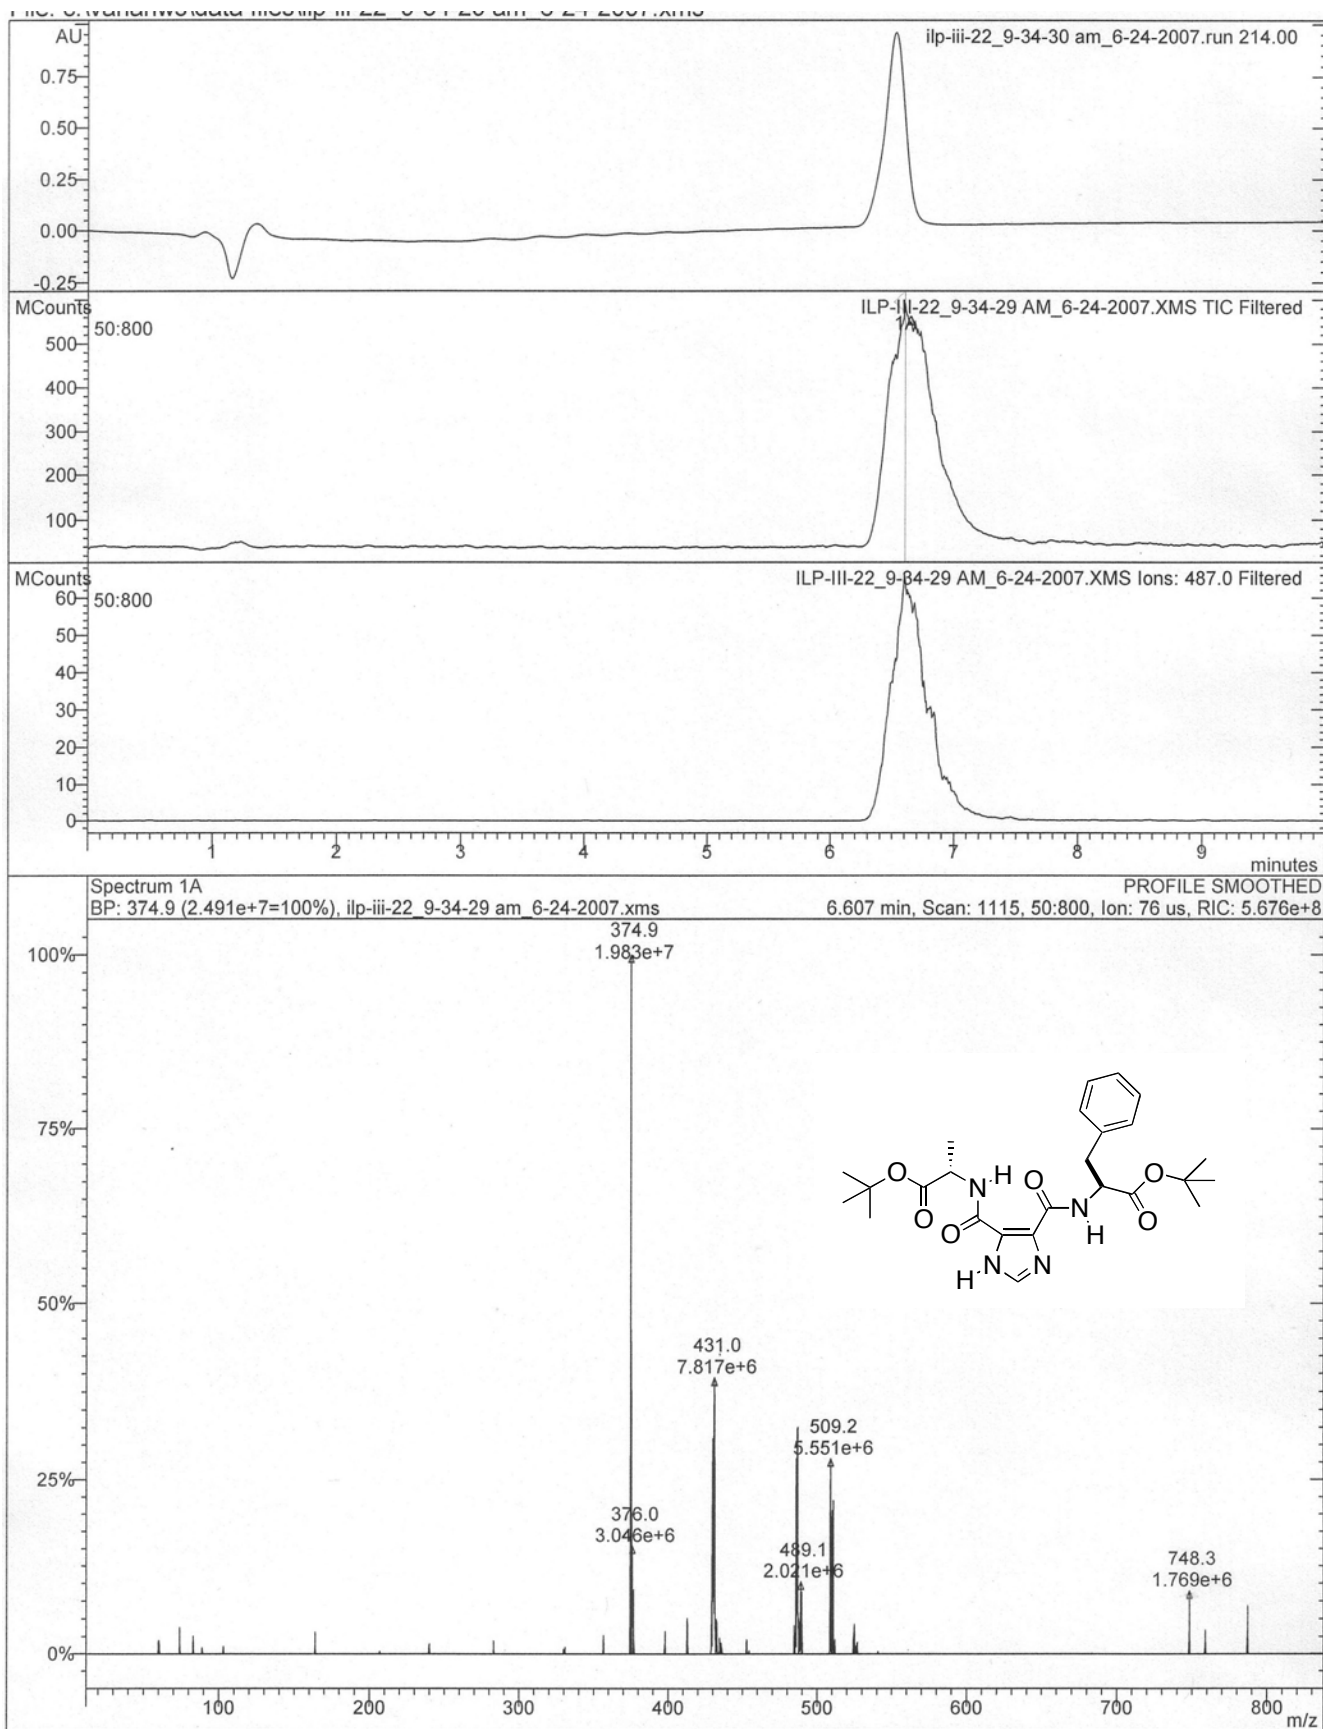

Figure S28. LC/MS data for 4{28}.

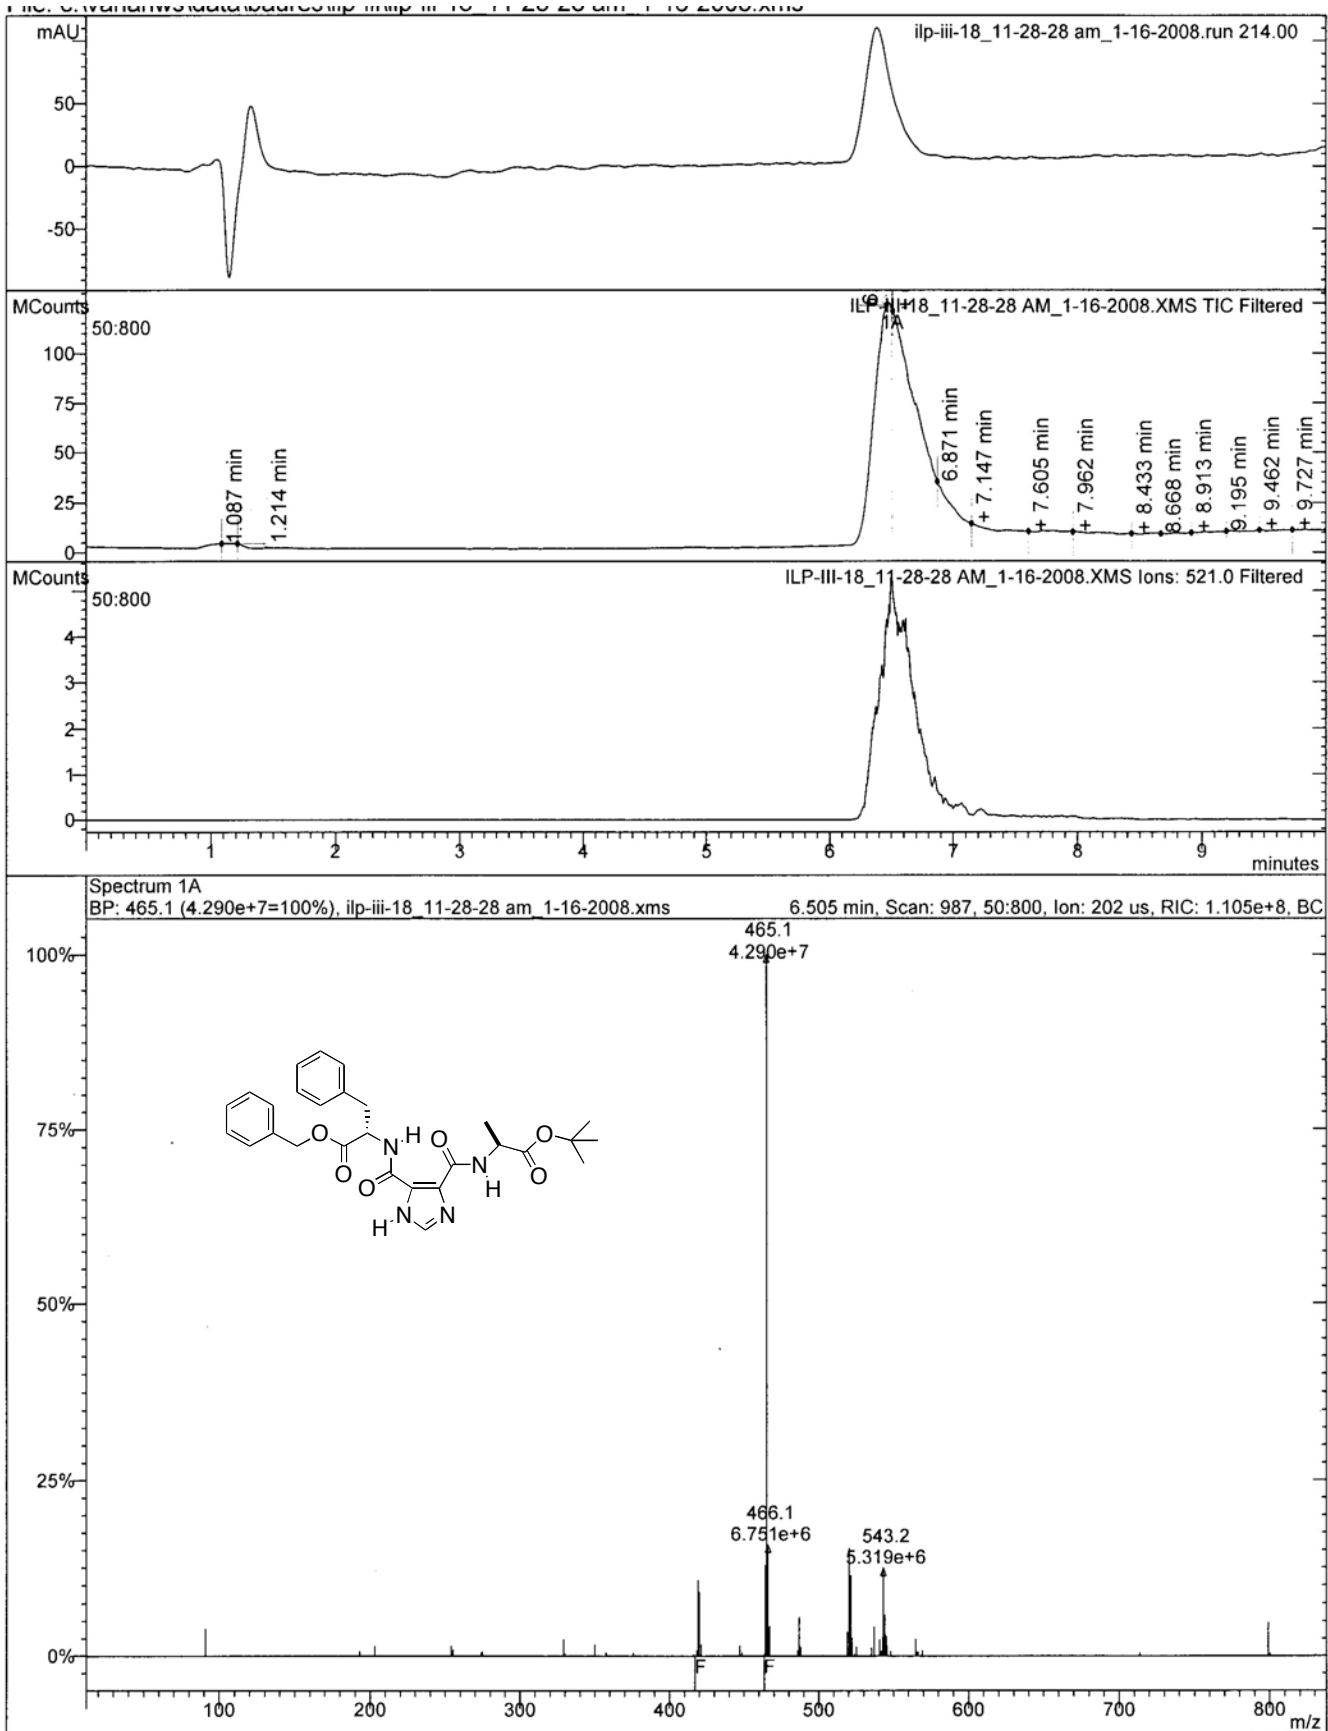

Figure S29. LC/MS data for 4{29}.

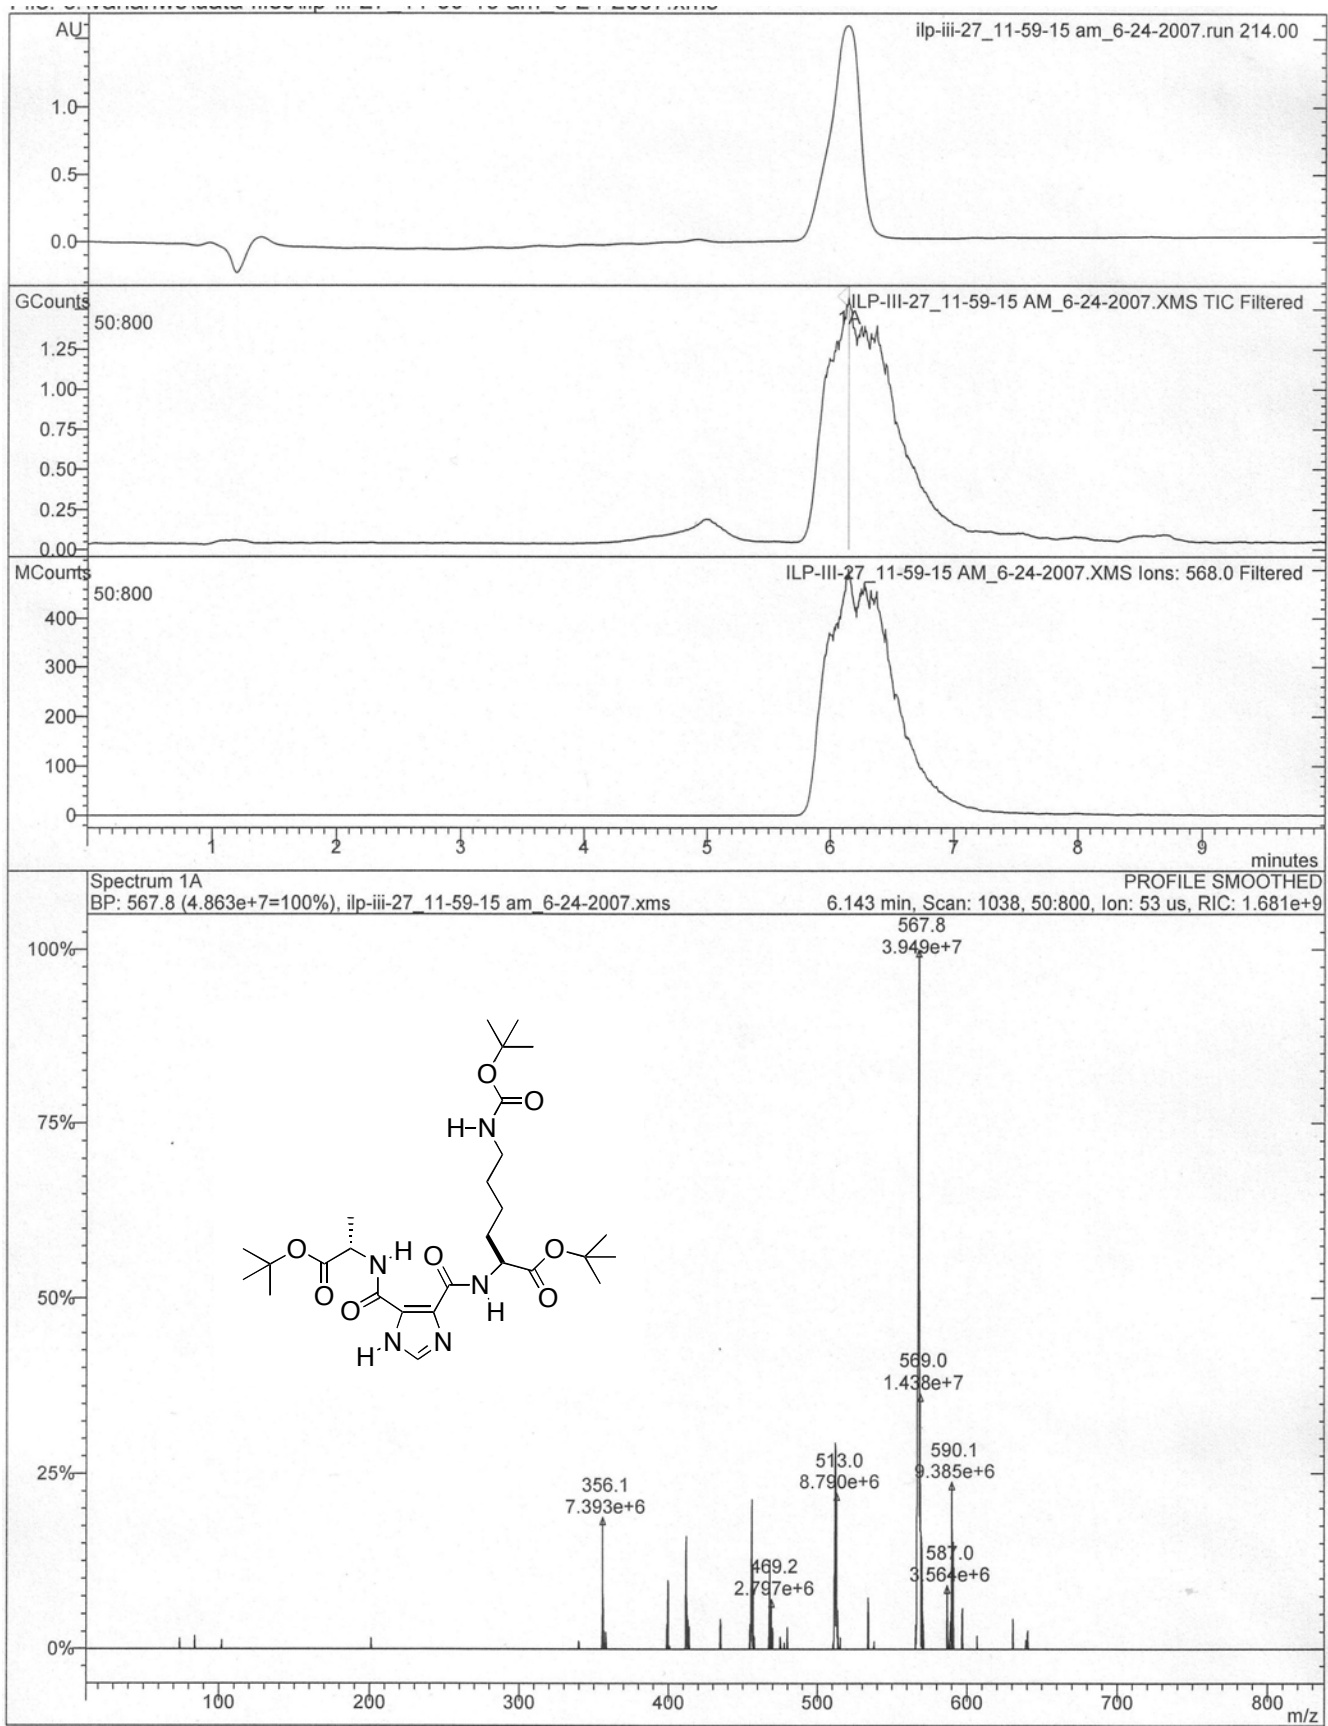

Figure S30. LC/MS data for 4{30}.

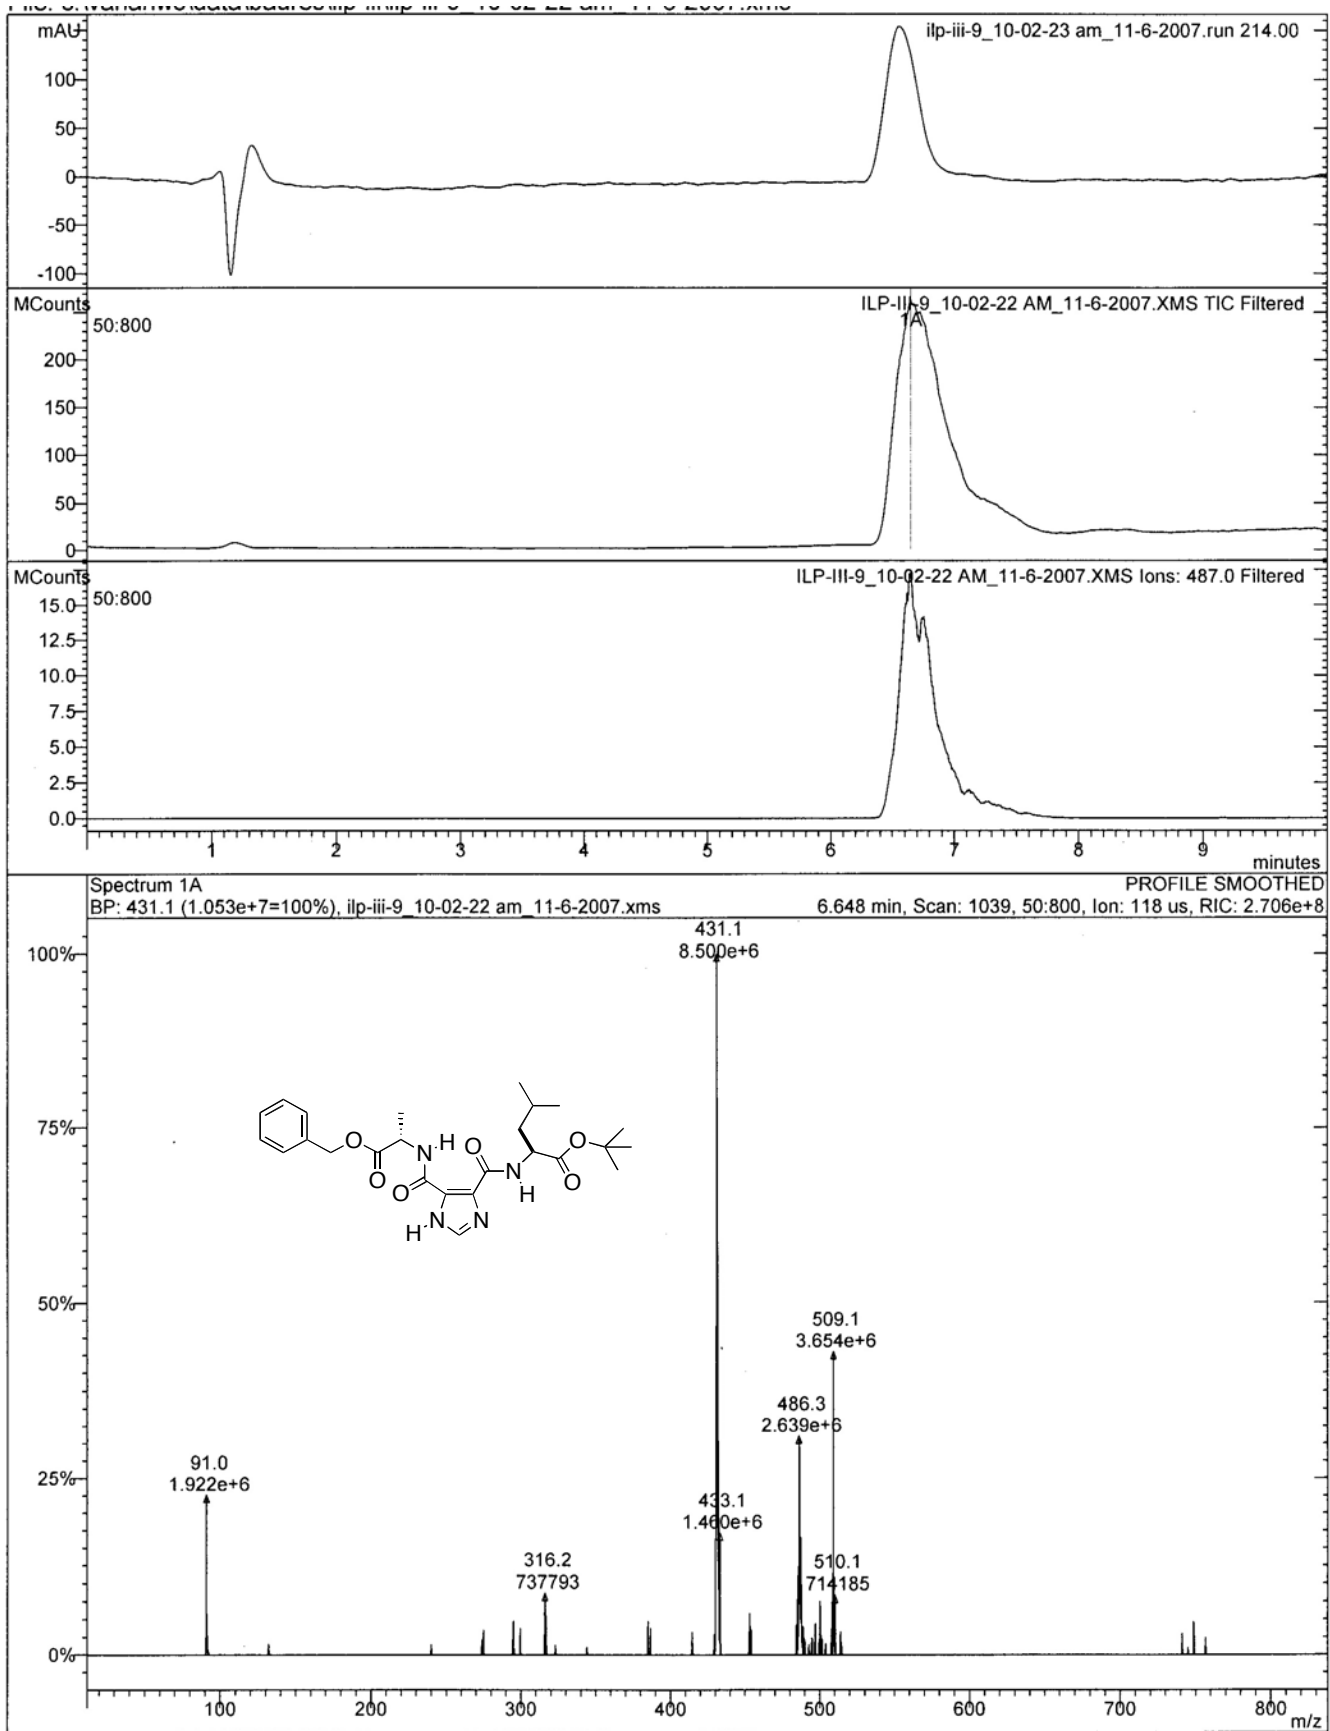

Figure S31. LC/MS data for 4{31}.

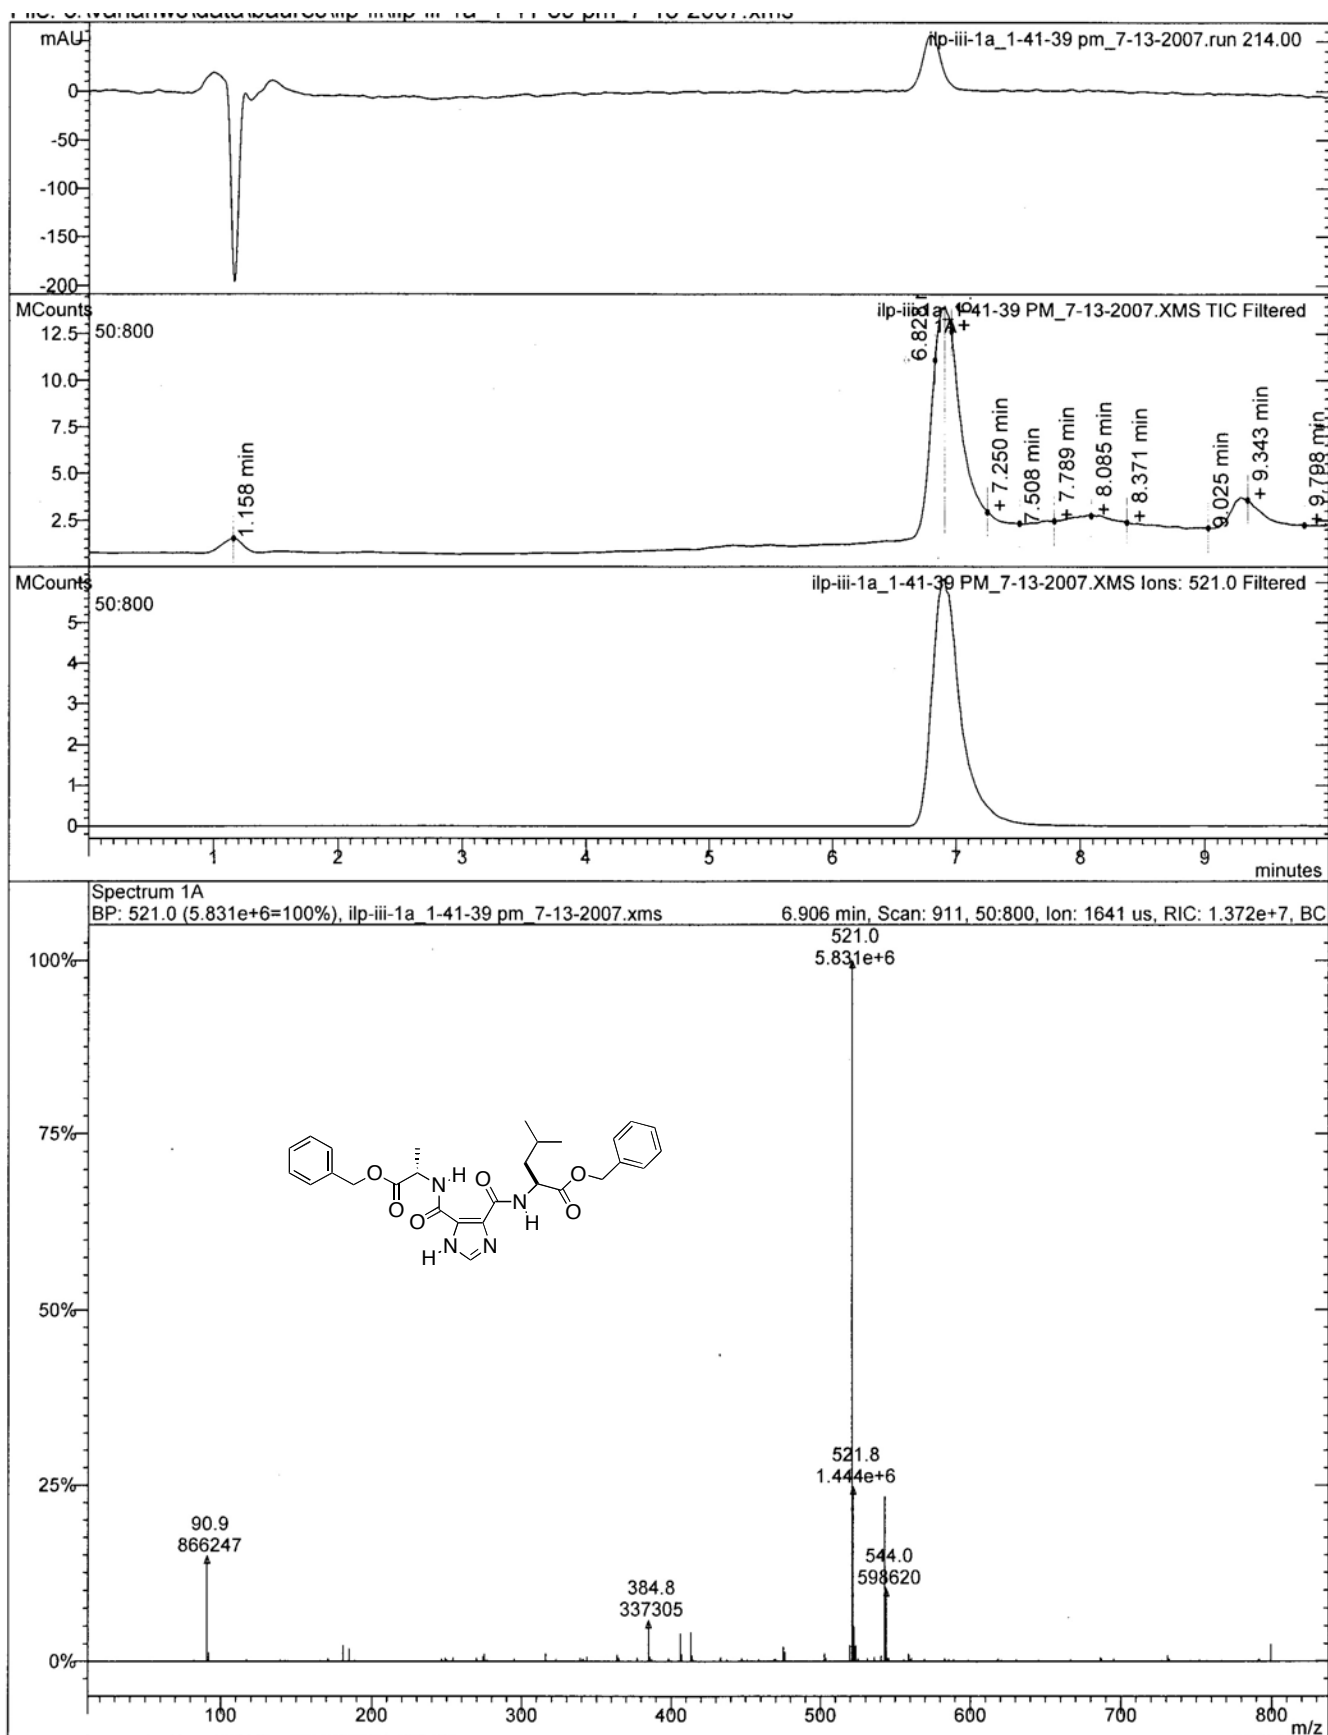

Figure S32. LC/MS data for 4{32}.



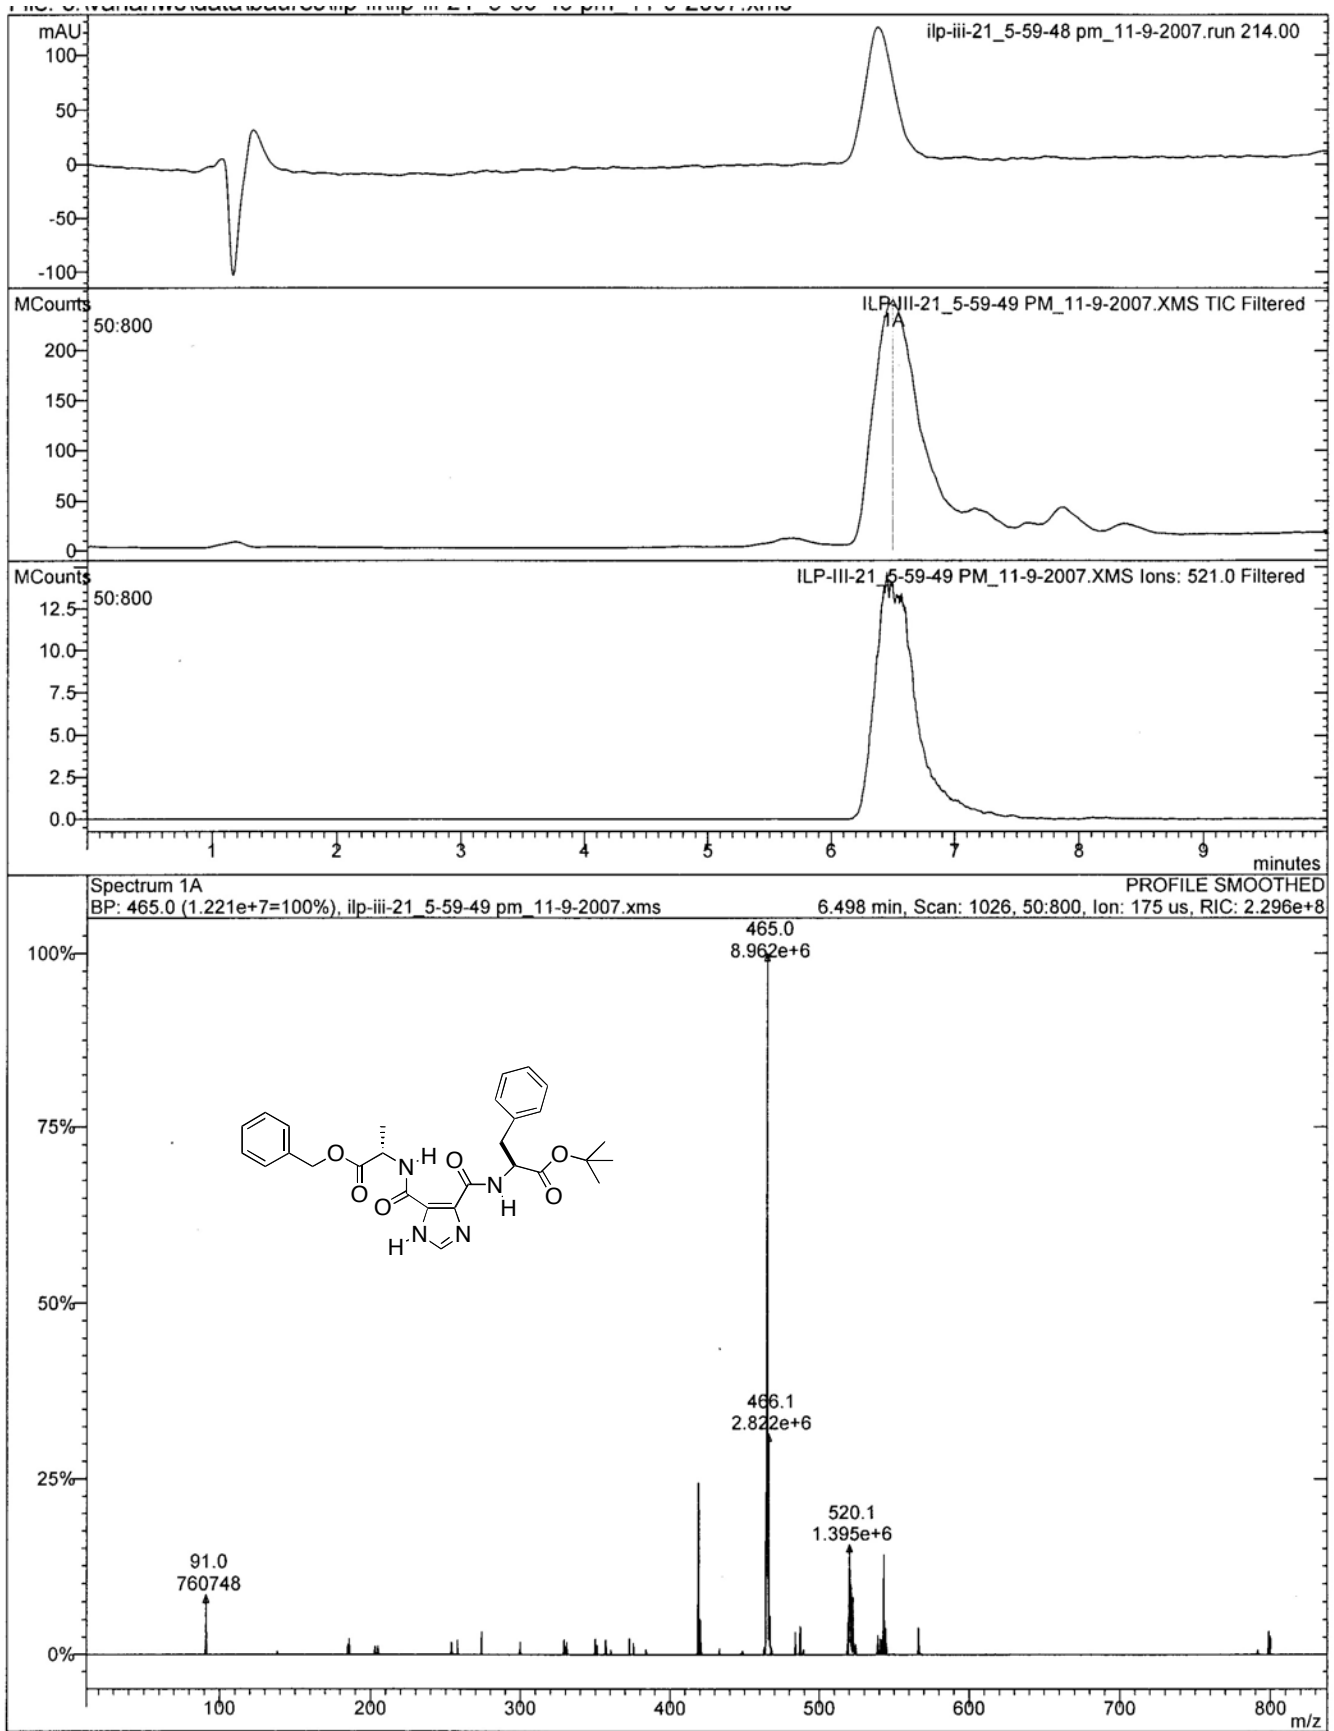

Figure S33. LC/MS data for 4{33}.



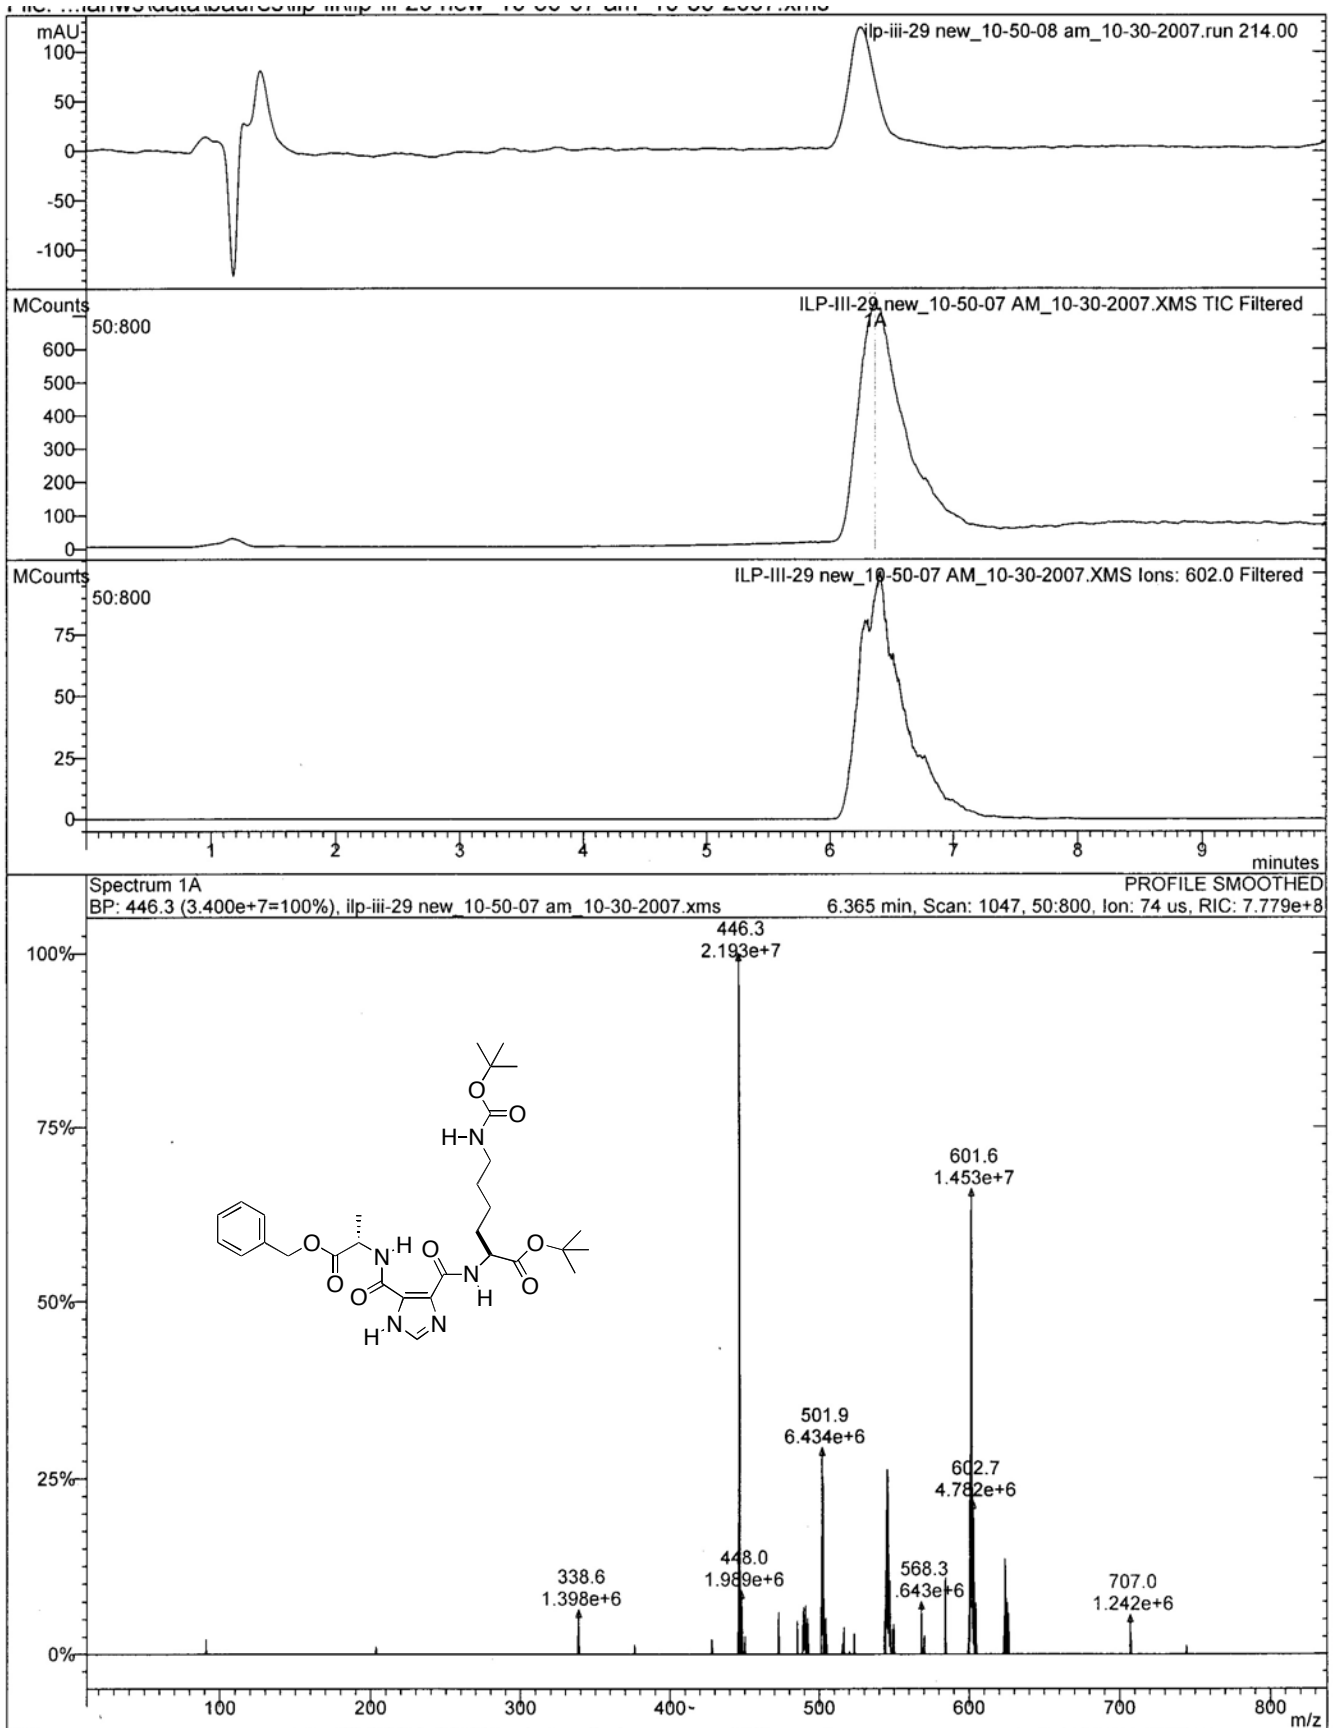

Figure S35. LC/MS data for 4{35}.

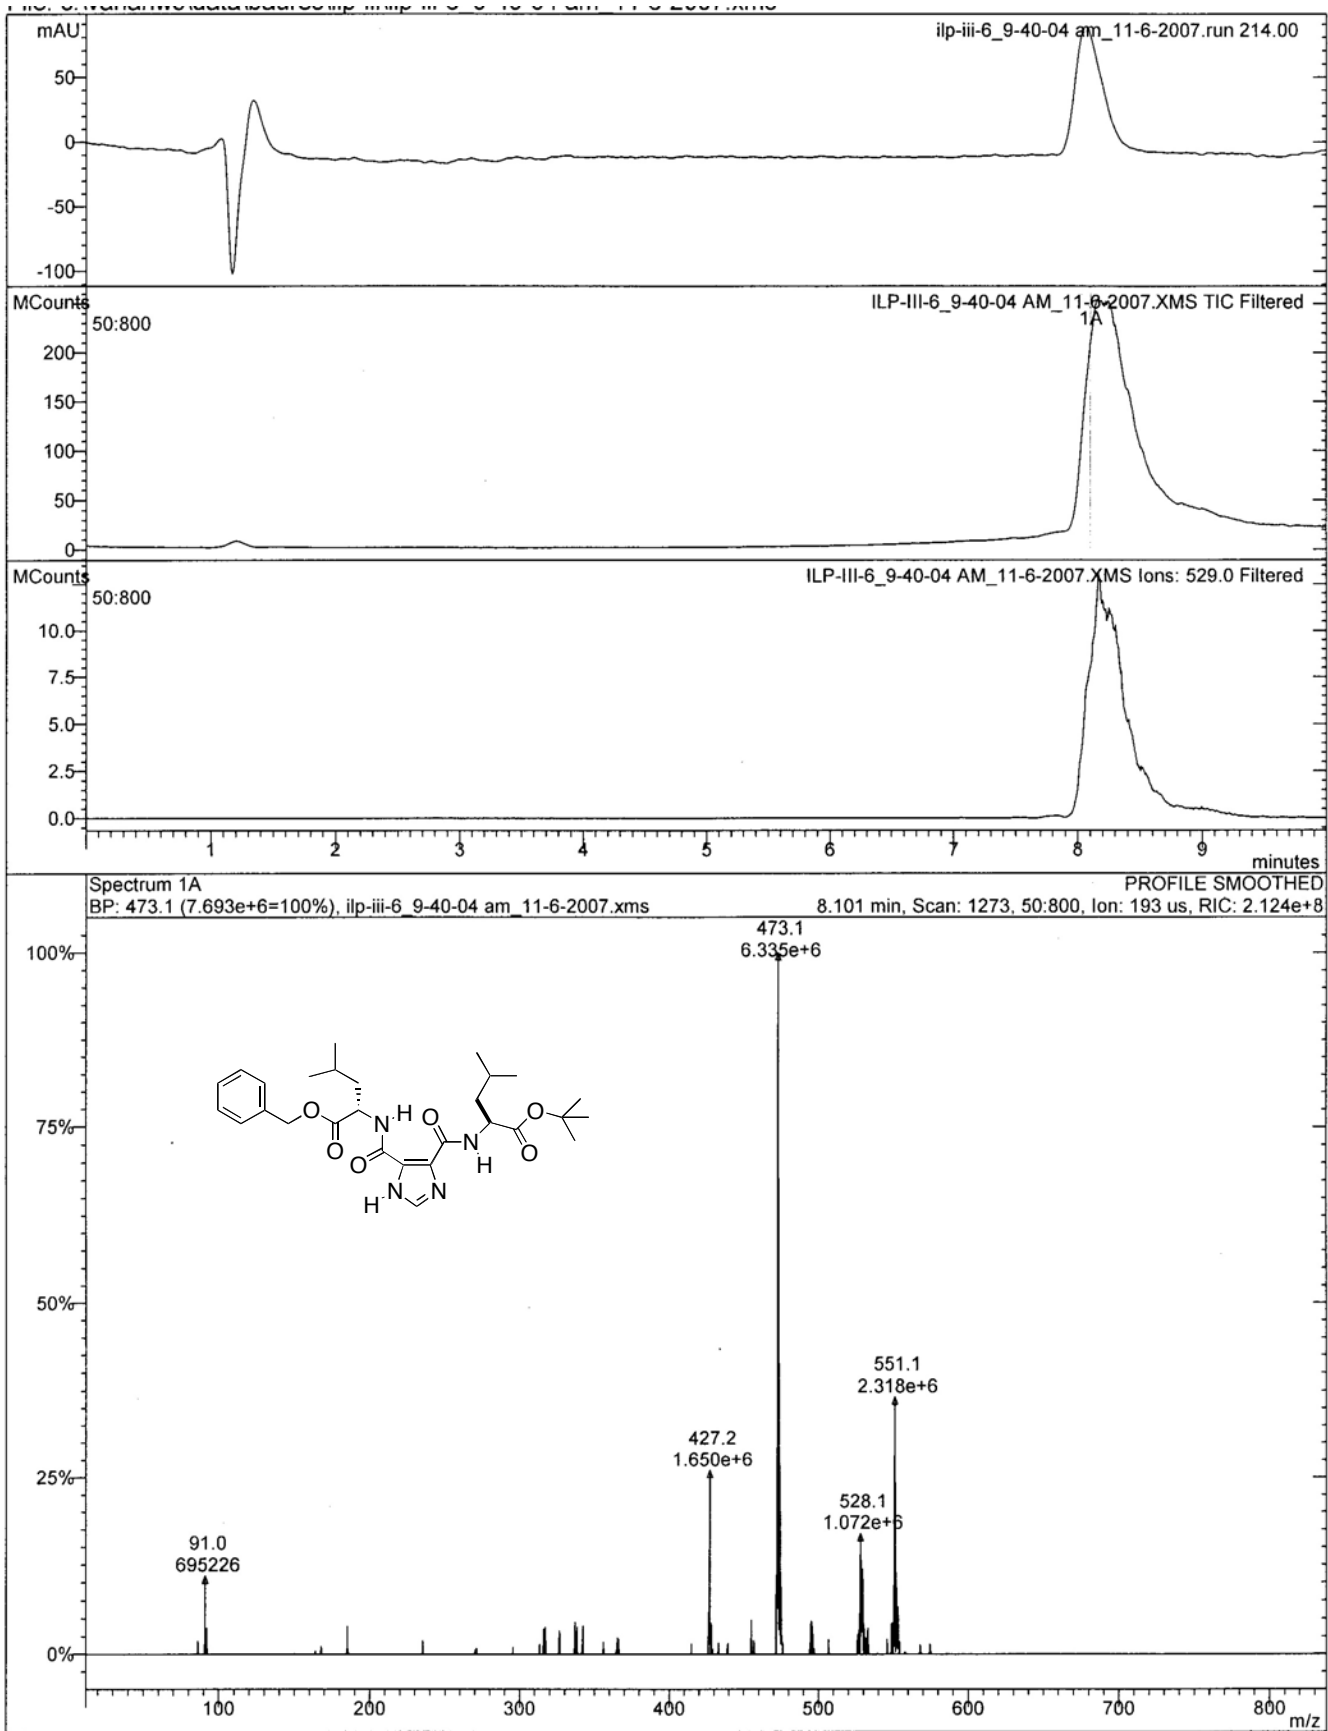

Figure S36. LC/MS data for 4{36}.

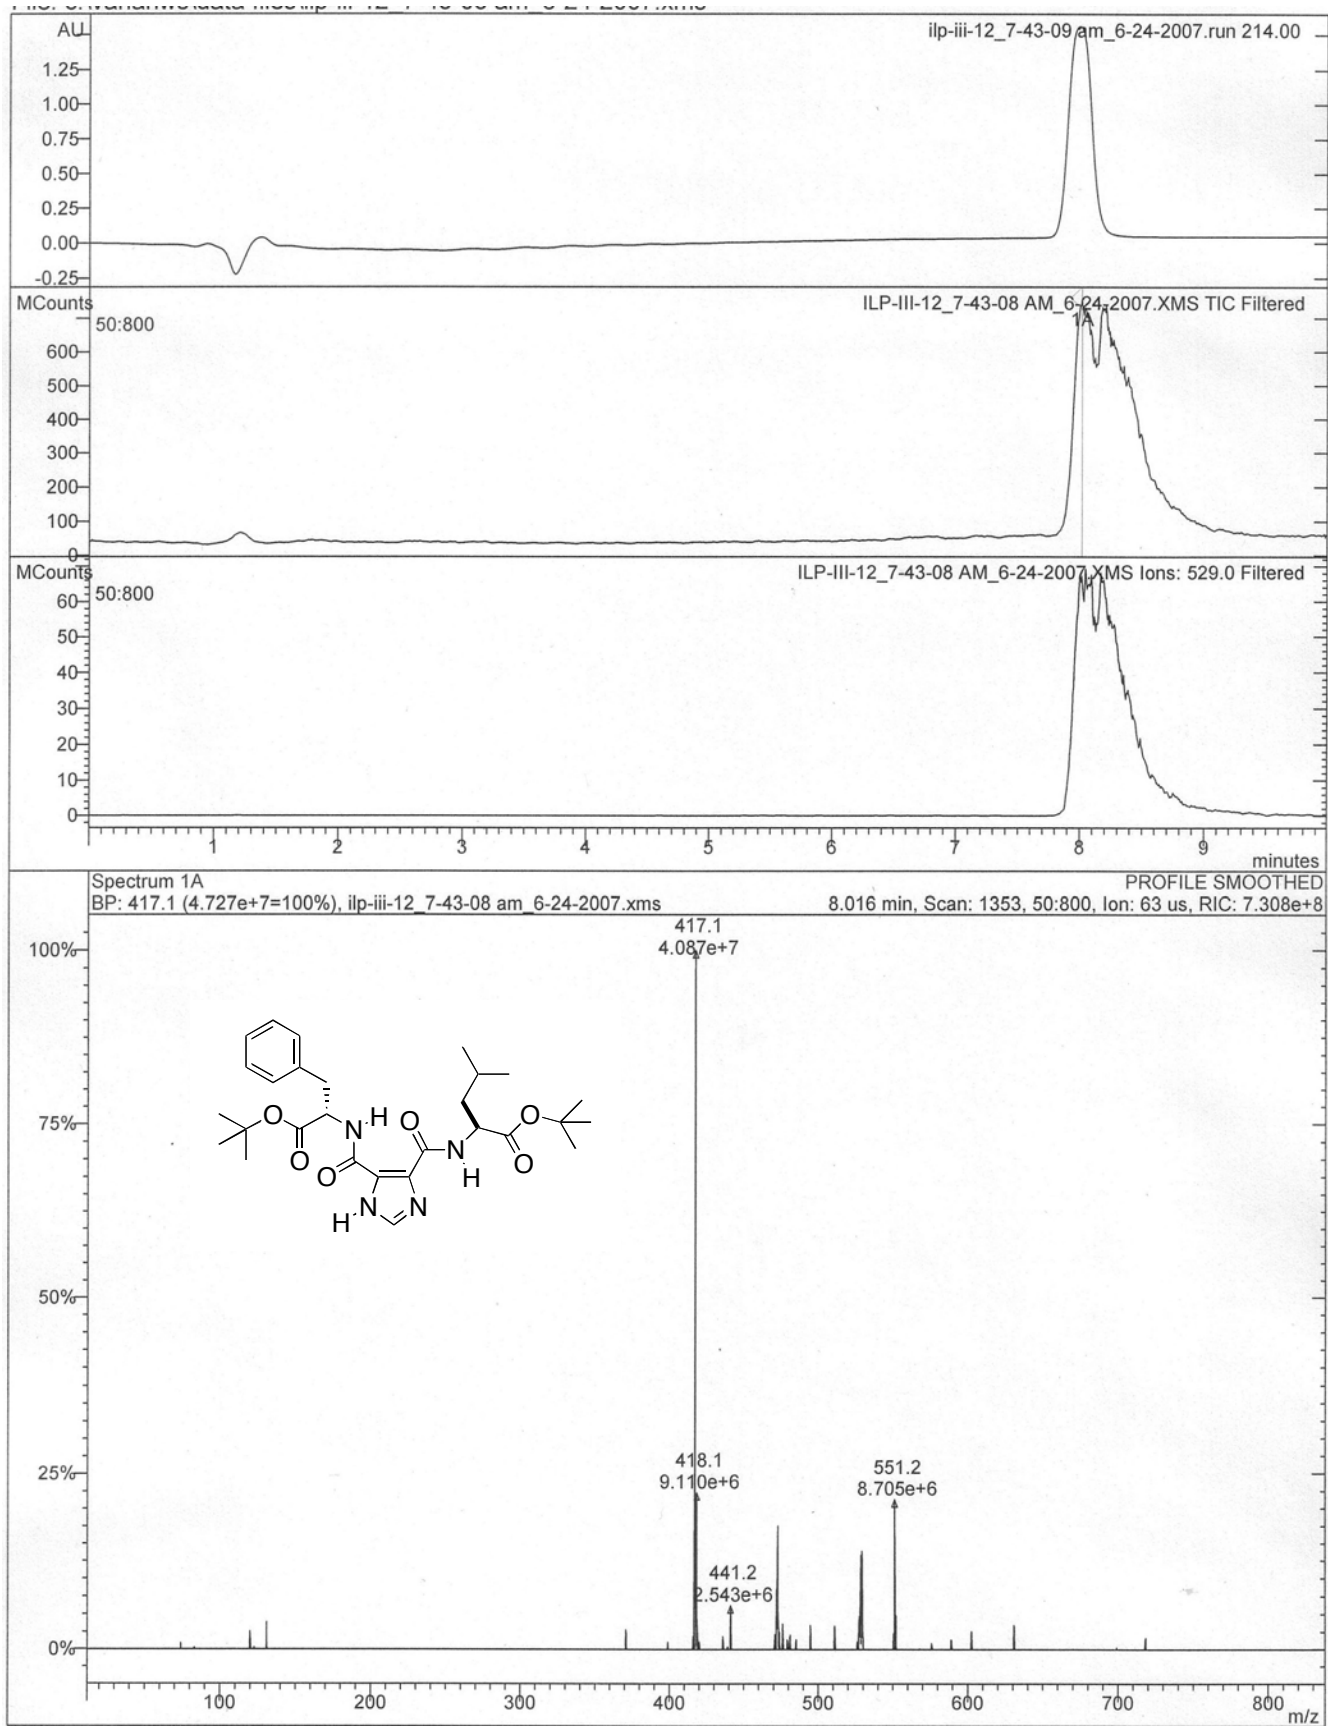

Figure S37. LC/MS data for 4{37}.

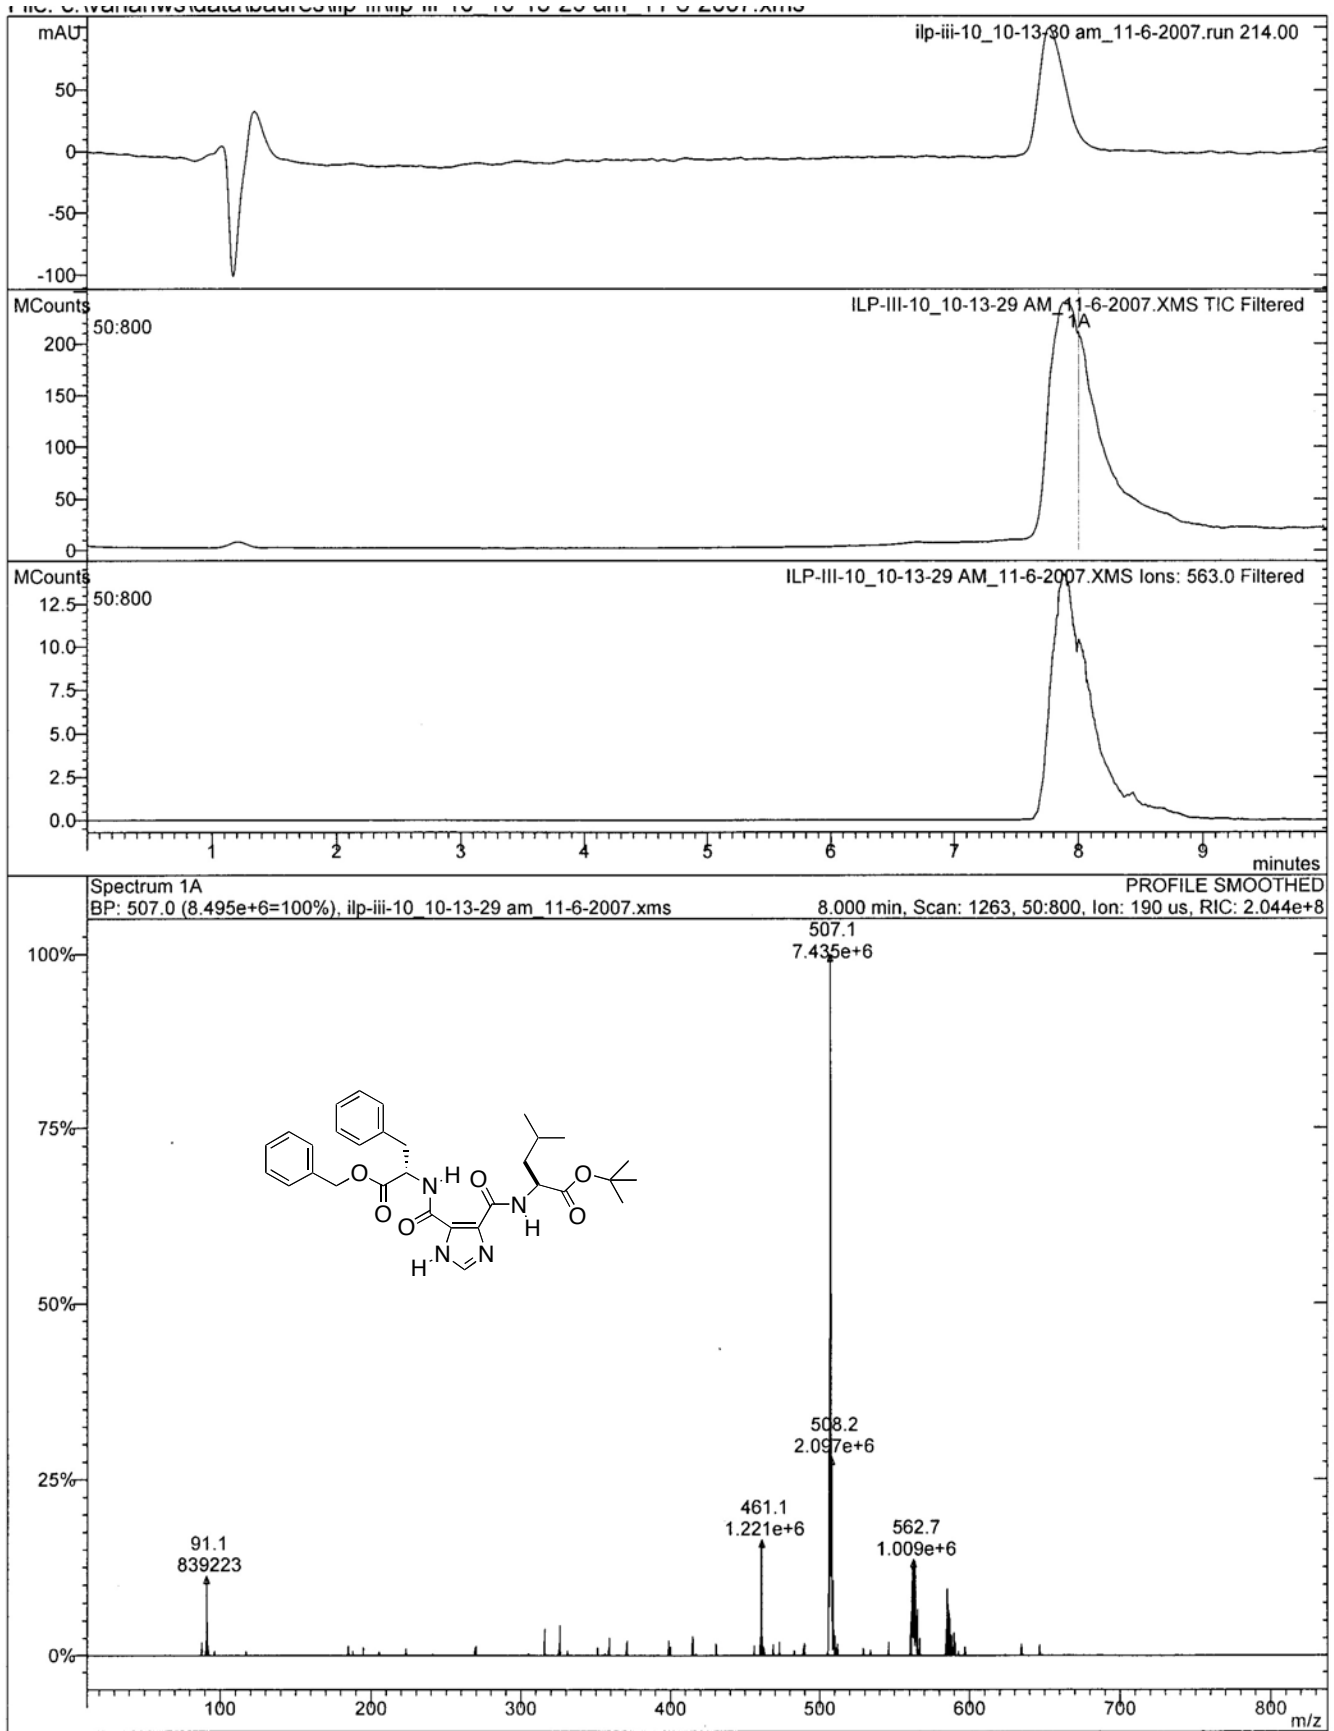

Figure S38. LC/MS data for 4{38}.

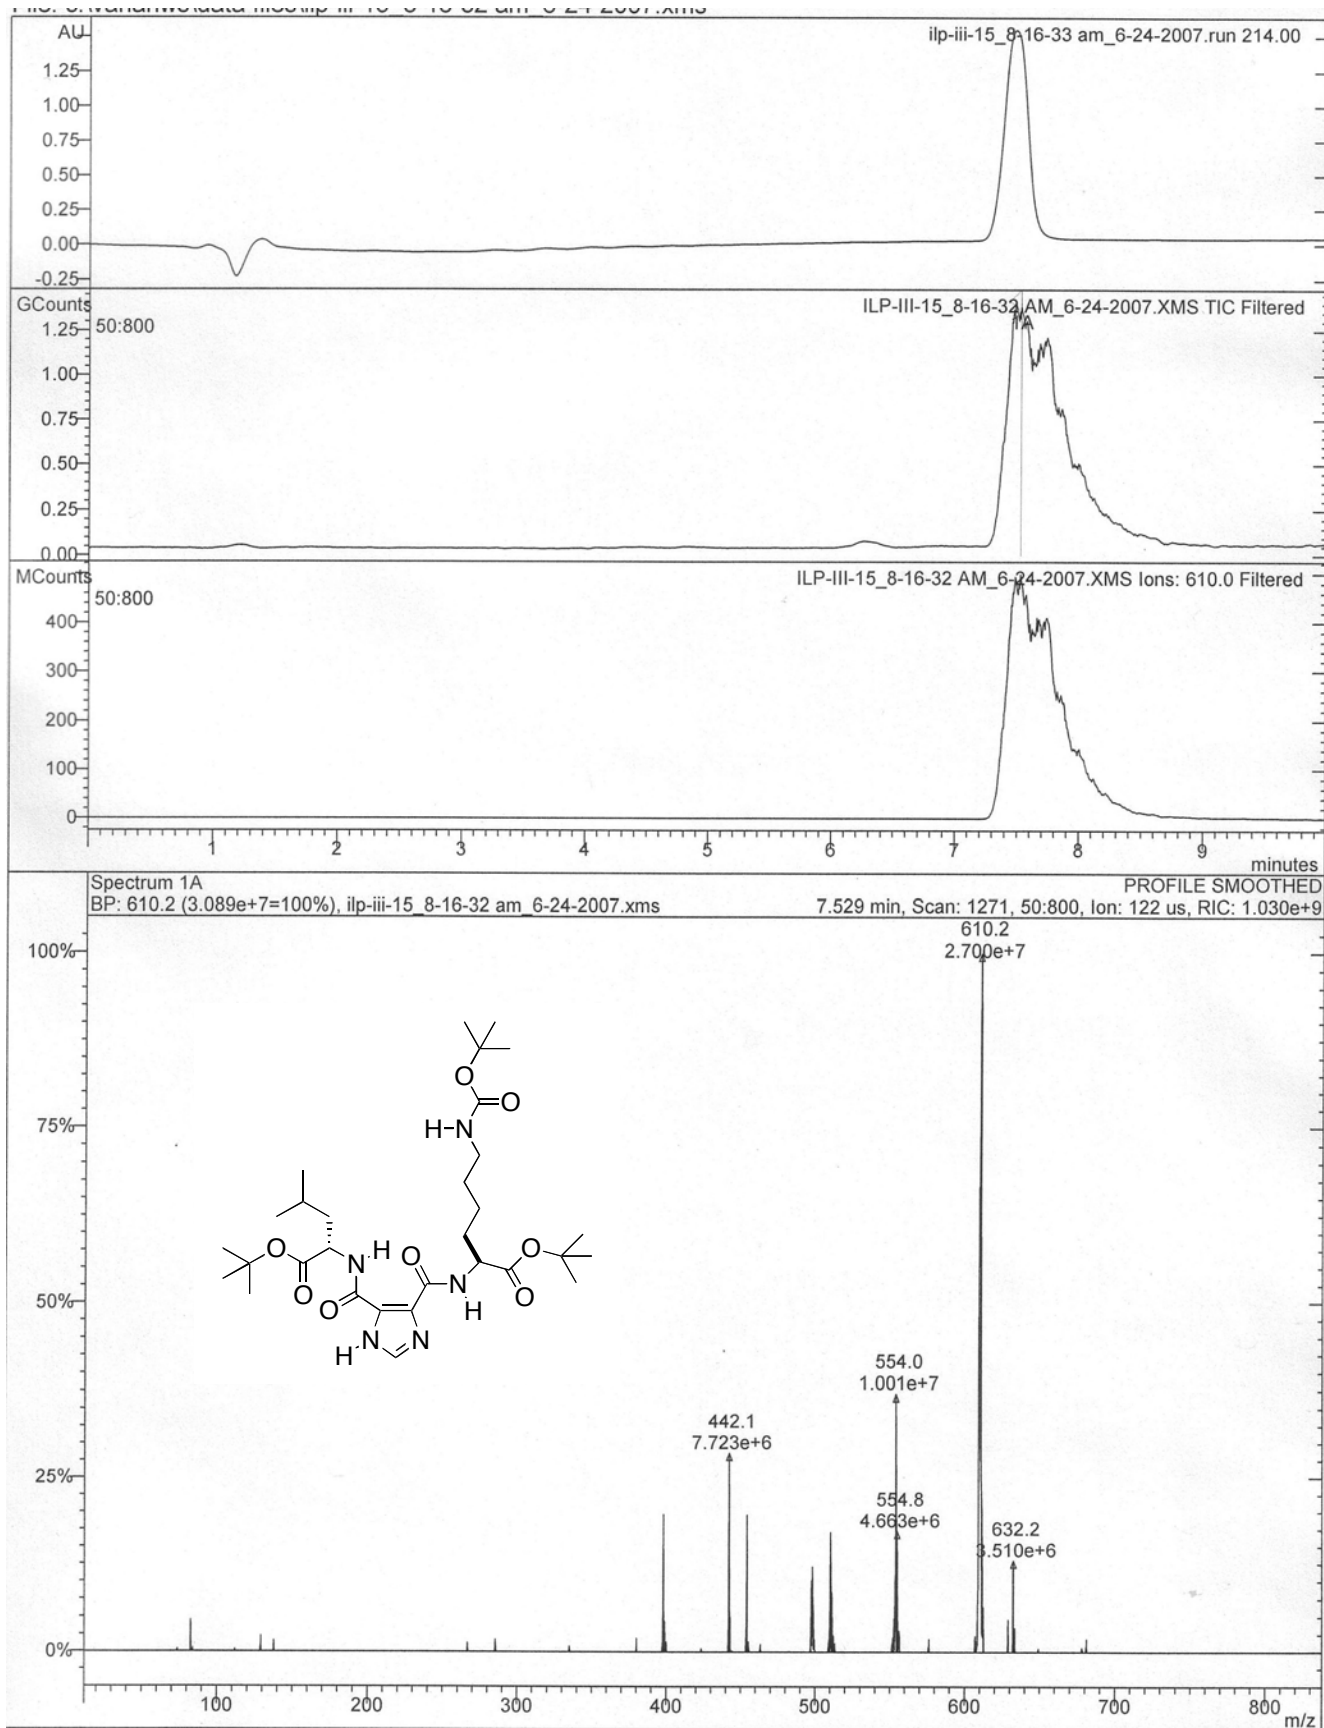

Figure S39. LC/MS data for 4{39}.

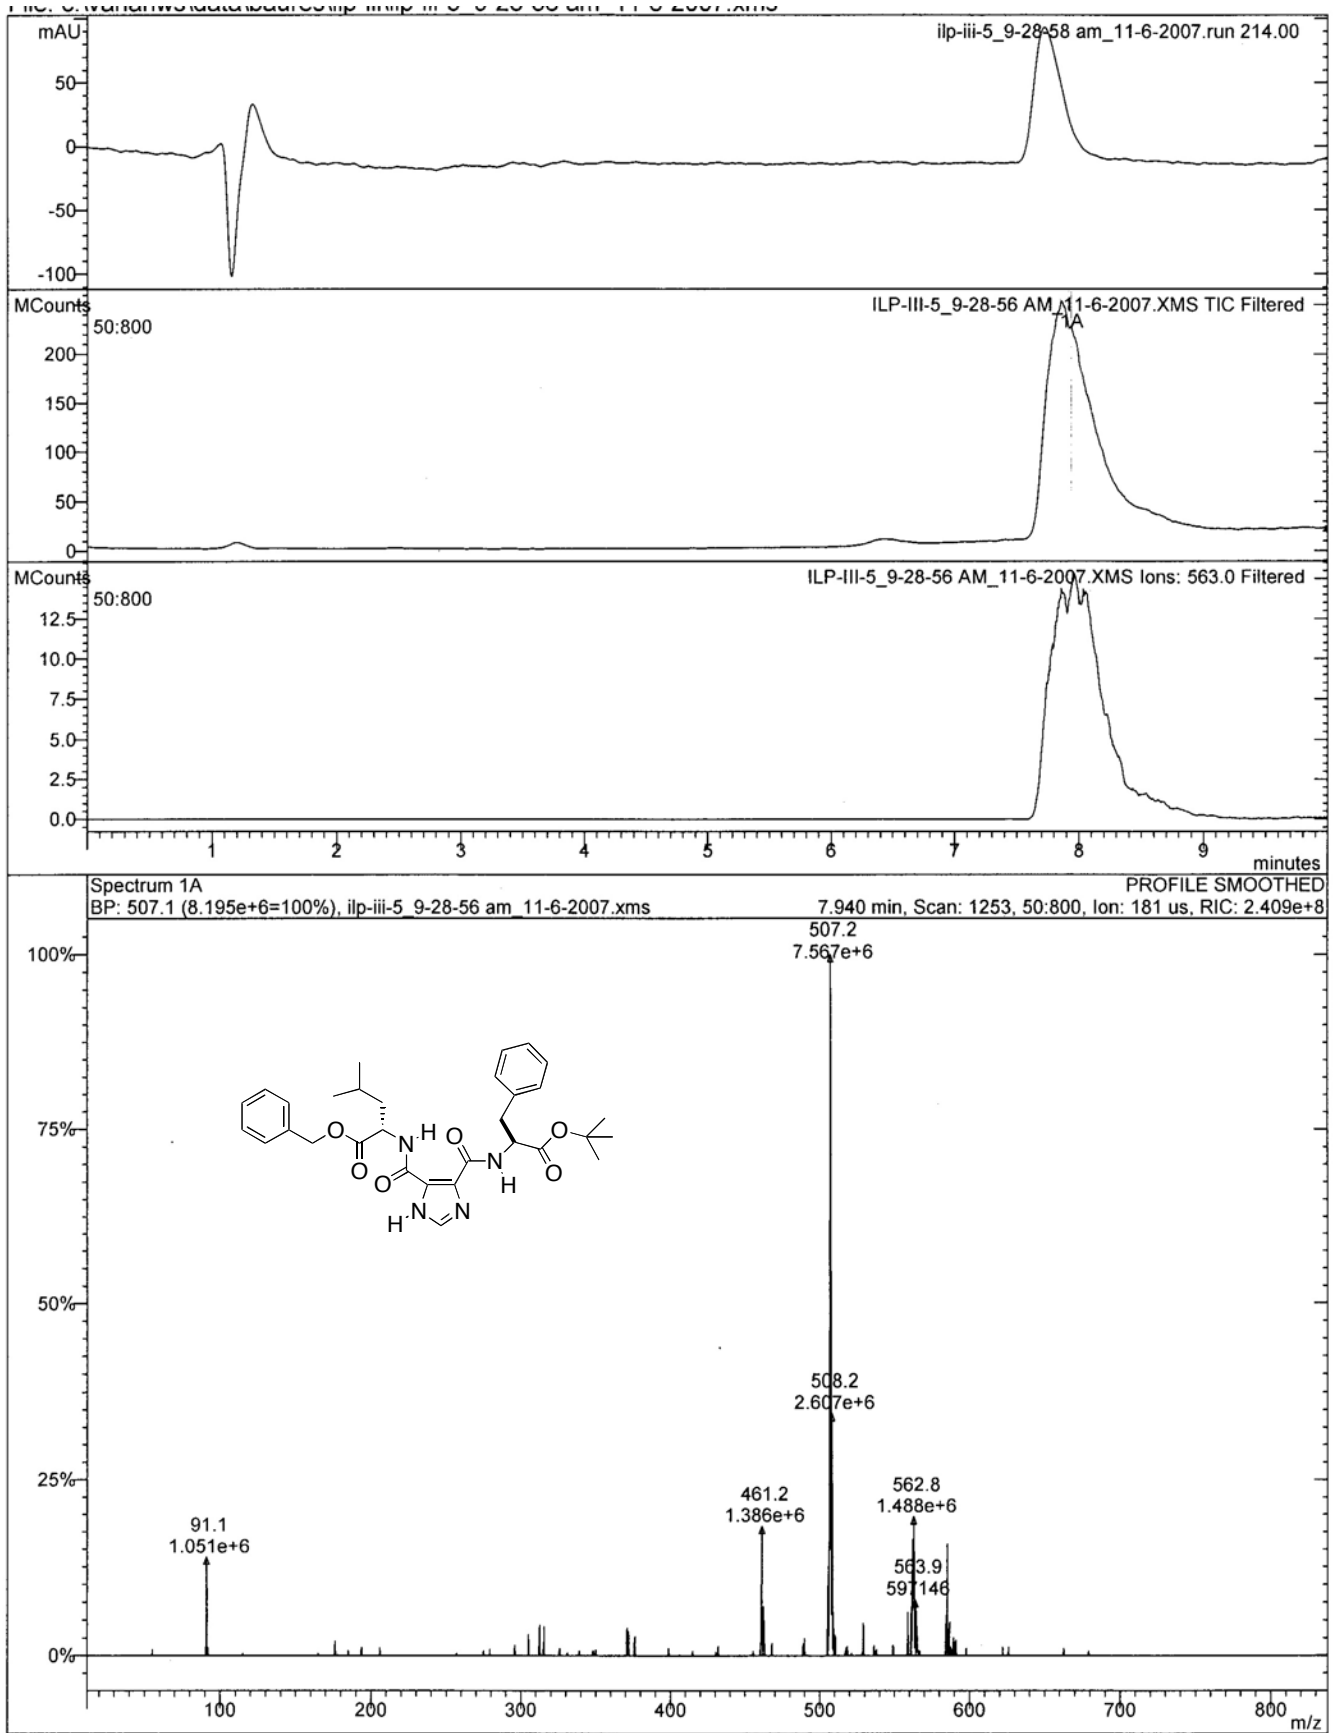

Figure S40. LC/MS data for 4{40}.



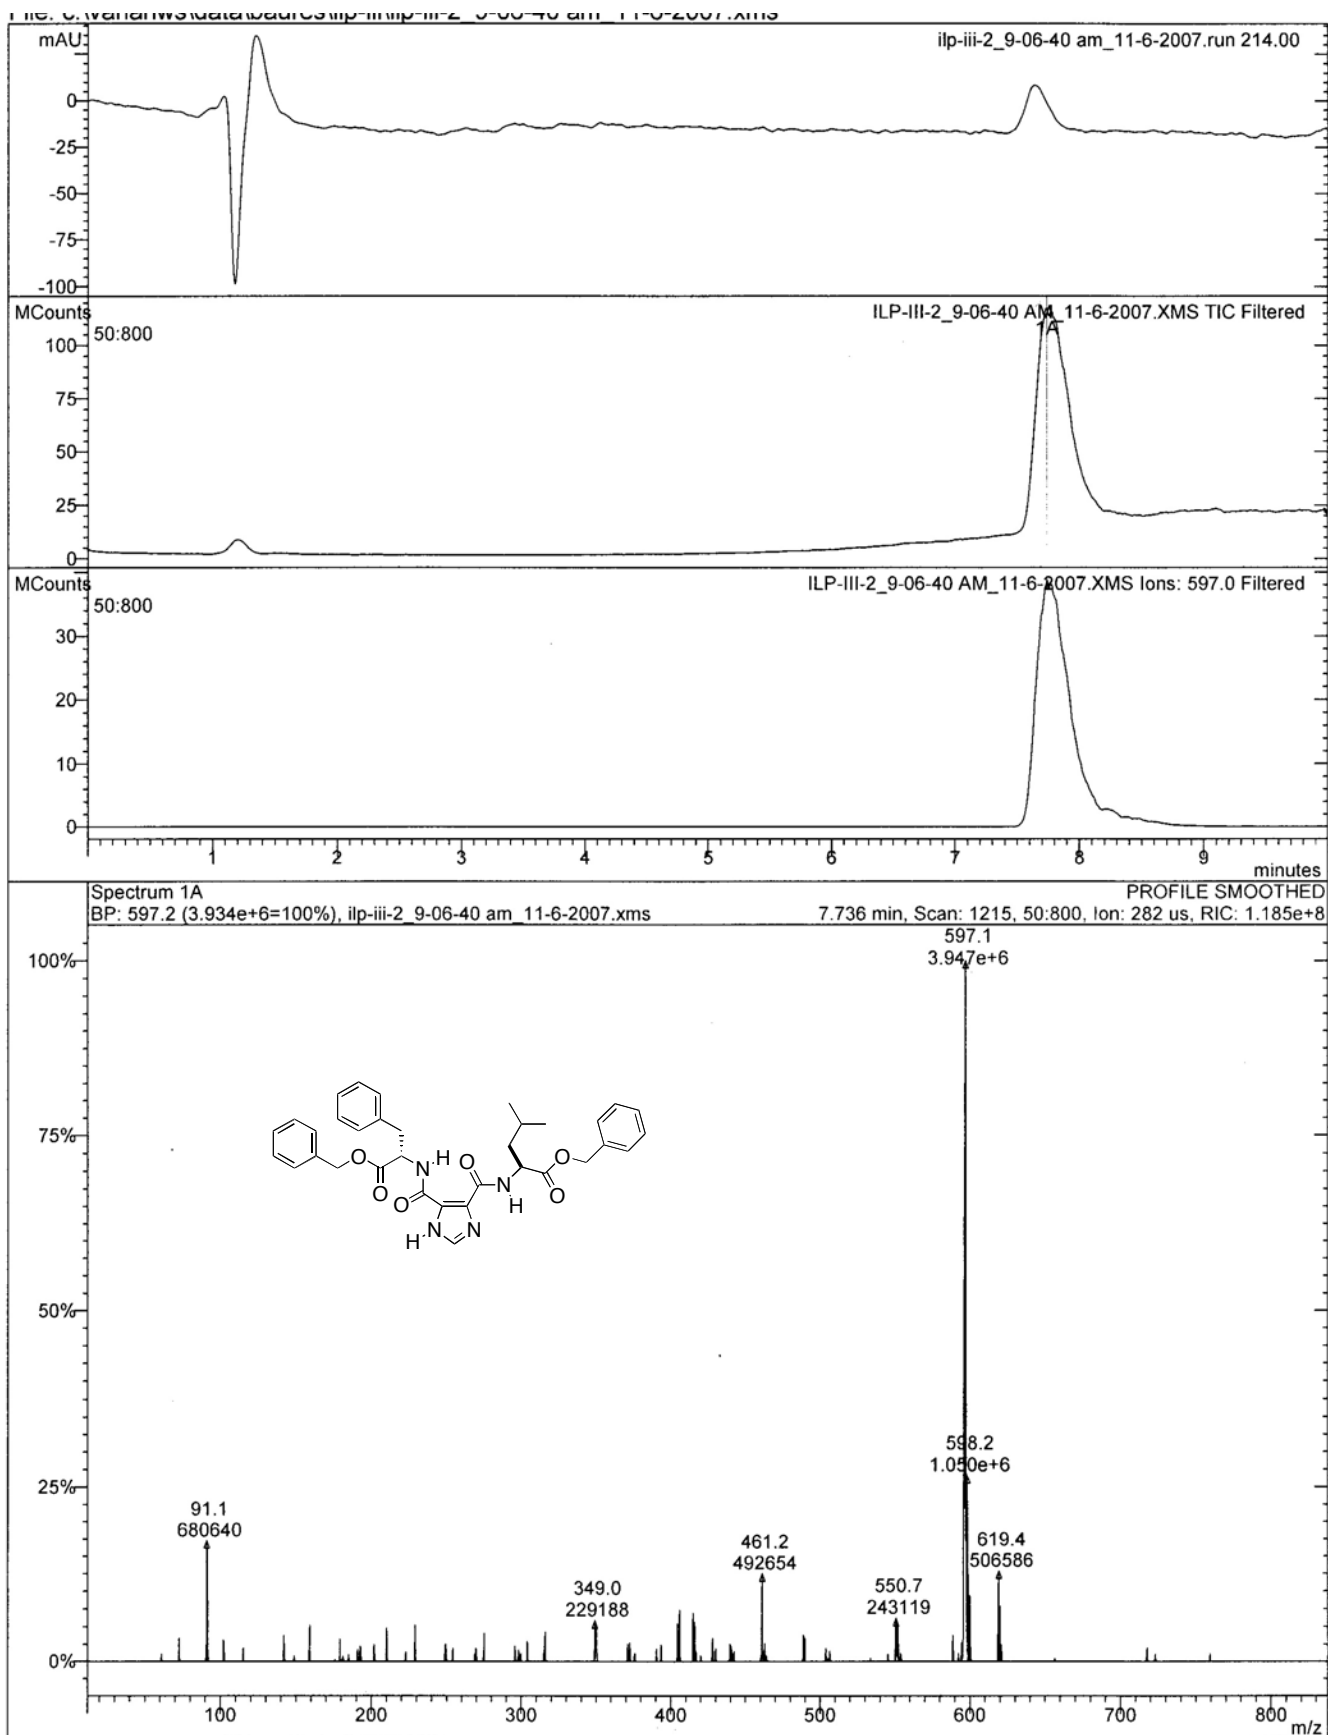

Figure S41. LC/MS data for 4{41}.

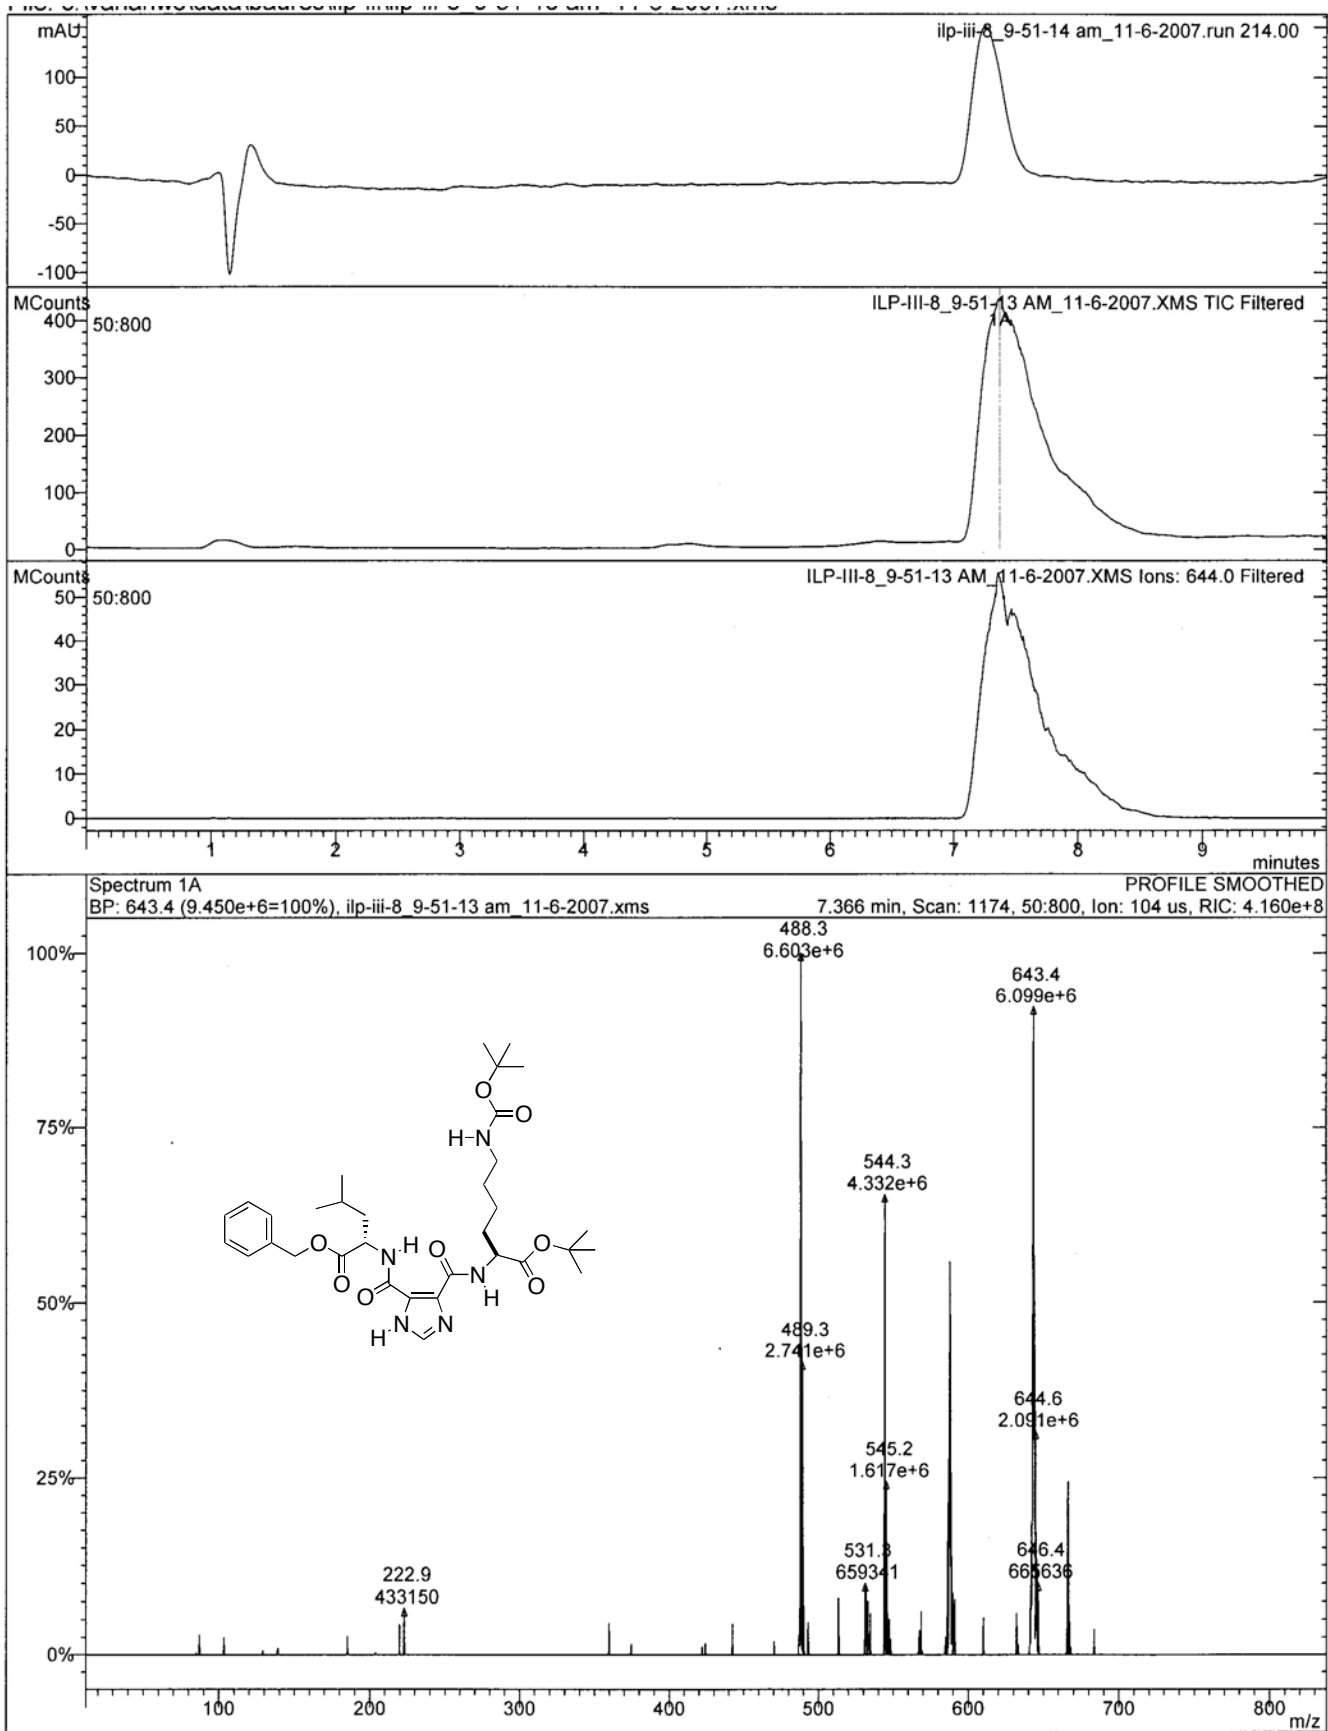

Figure S42. LC/MS data for 4{42}.

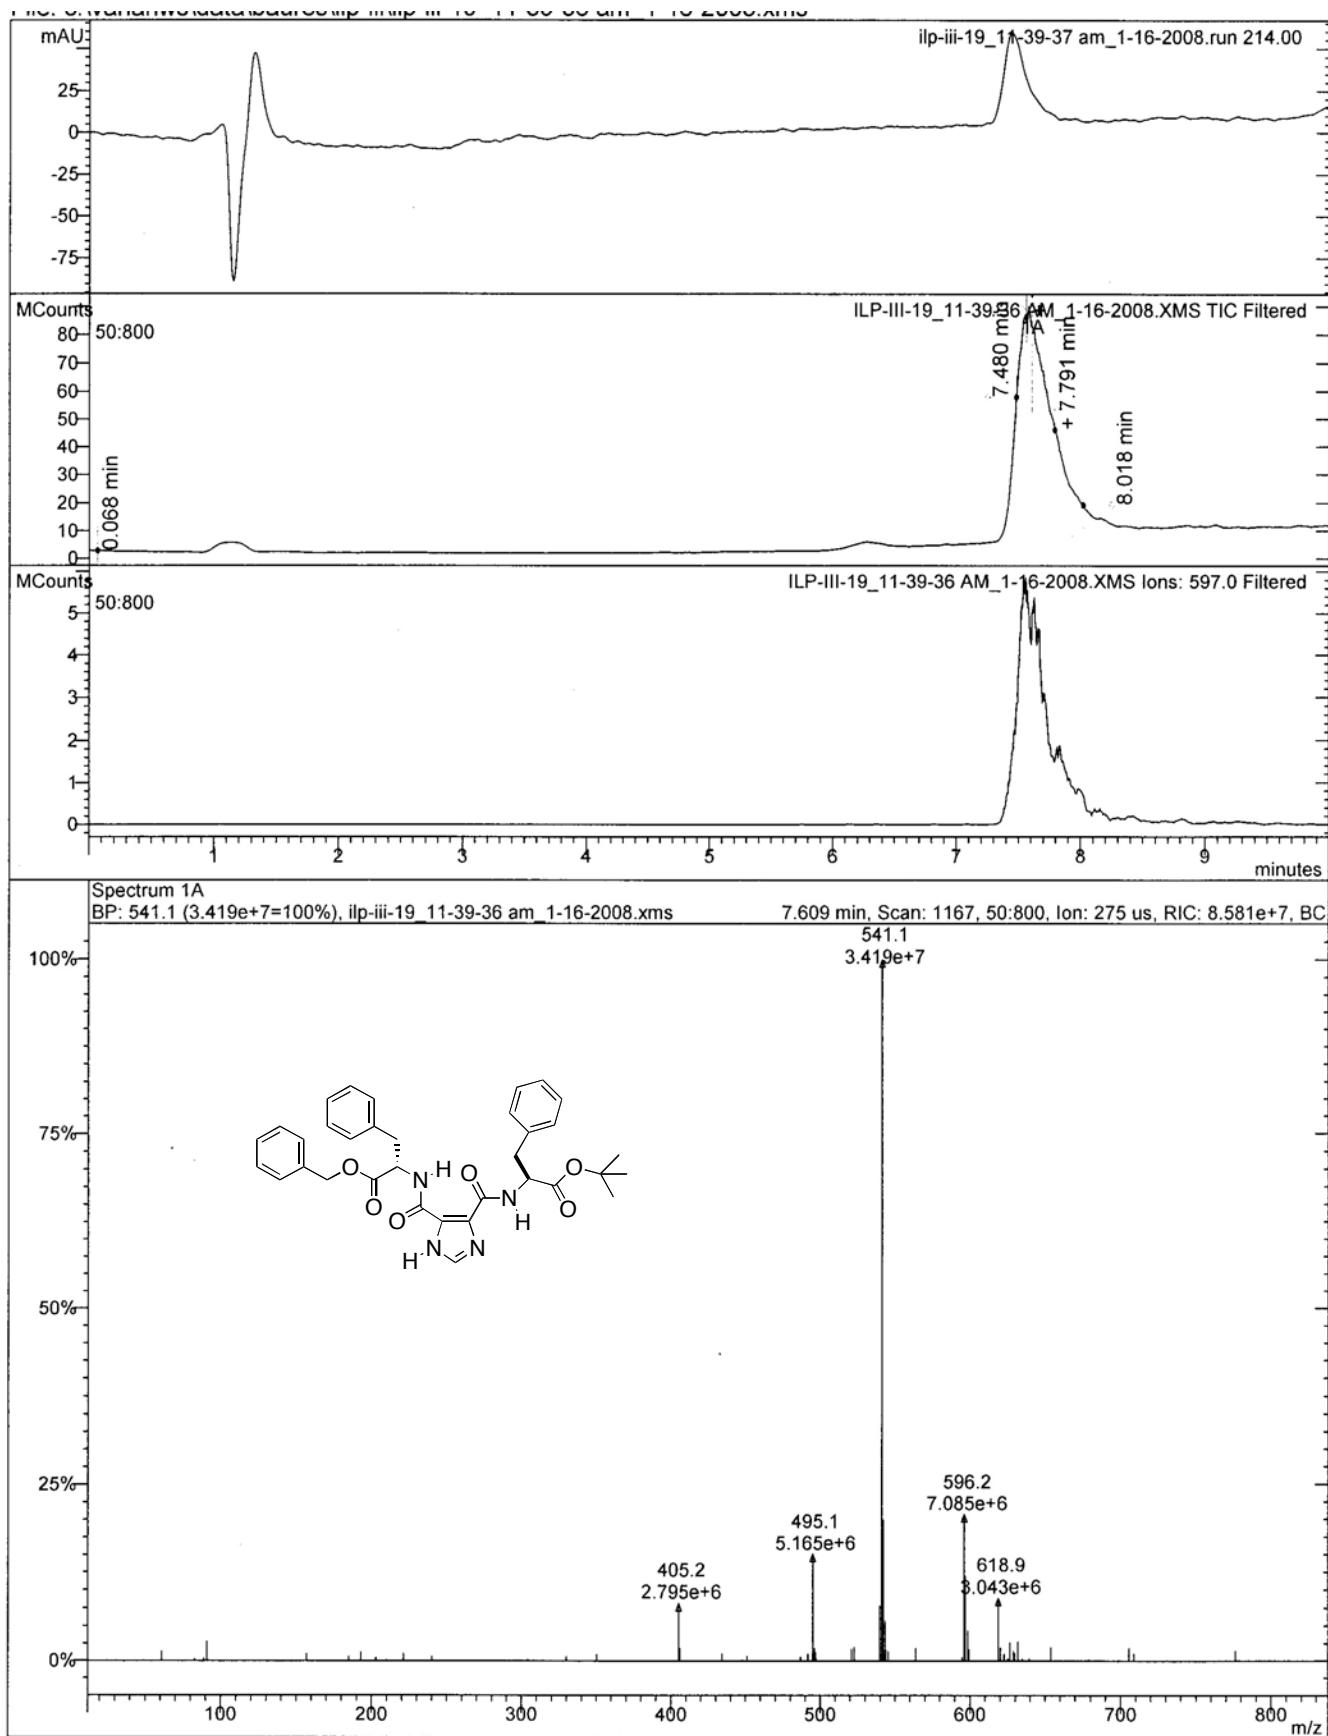

Figure S43. LC/MS data for 4{43}.

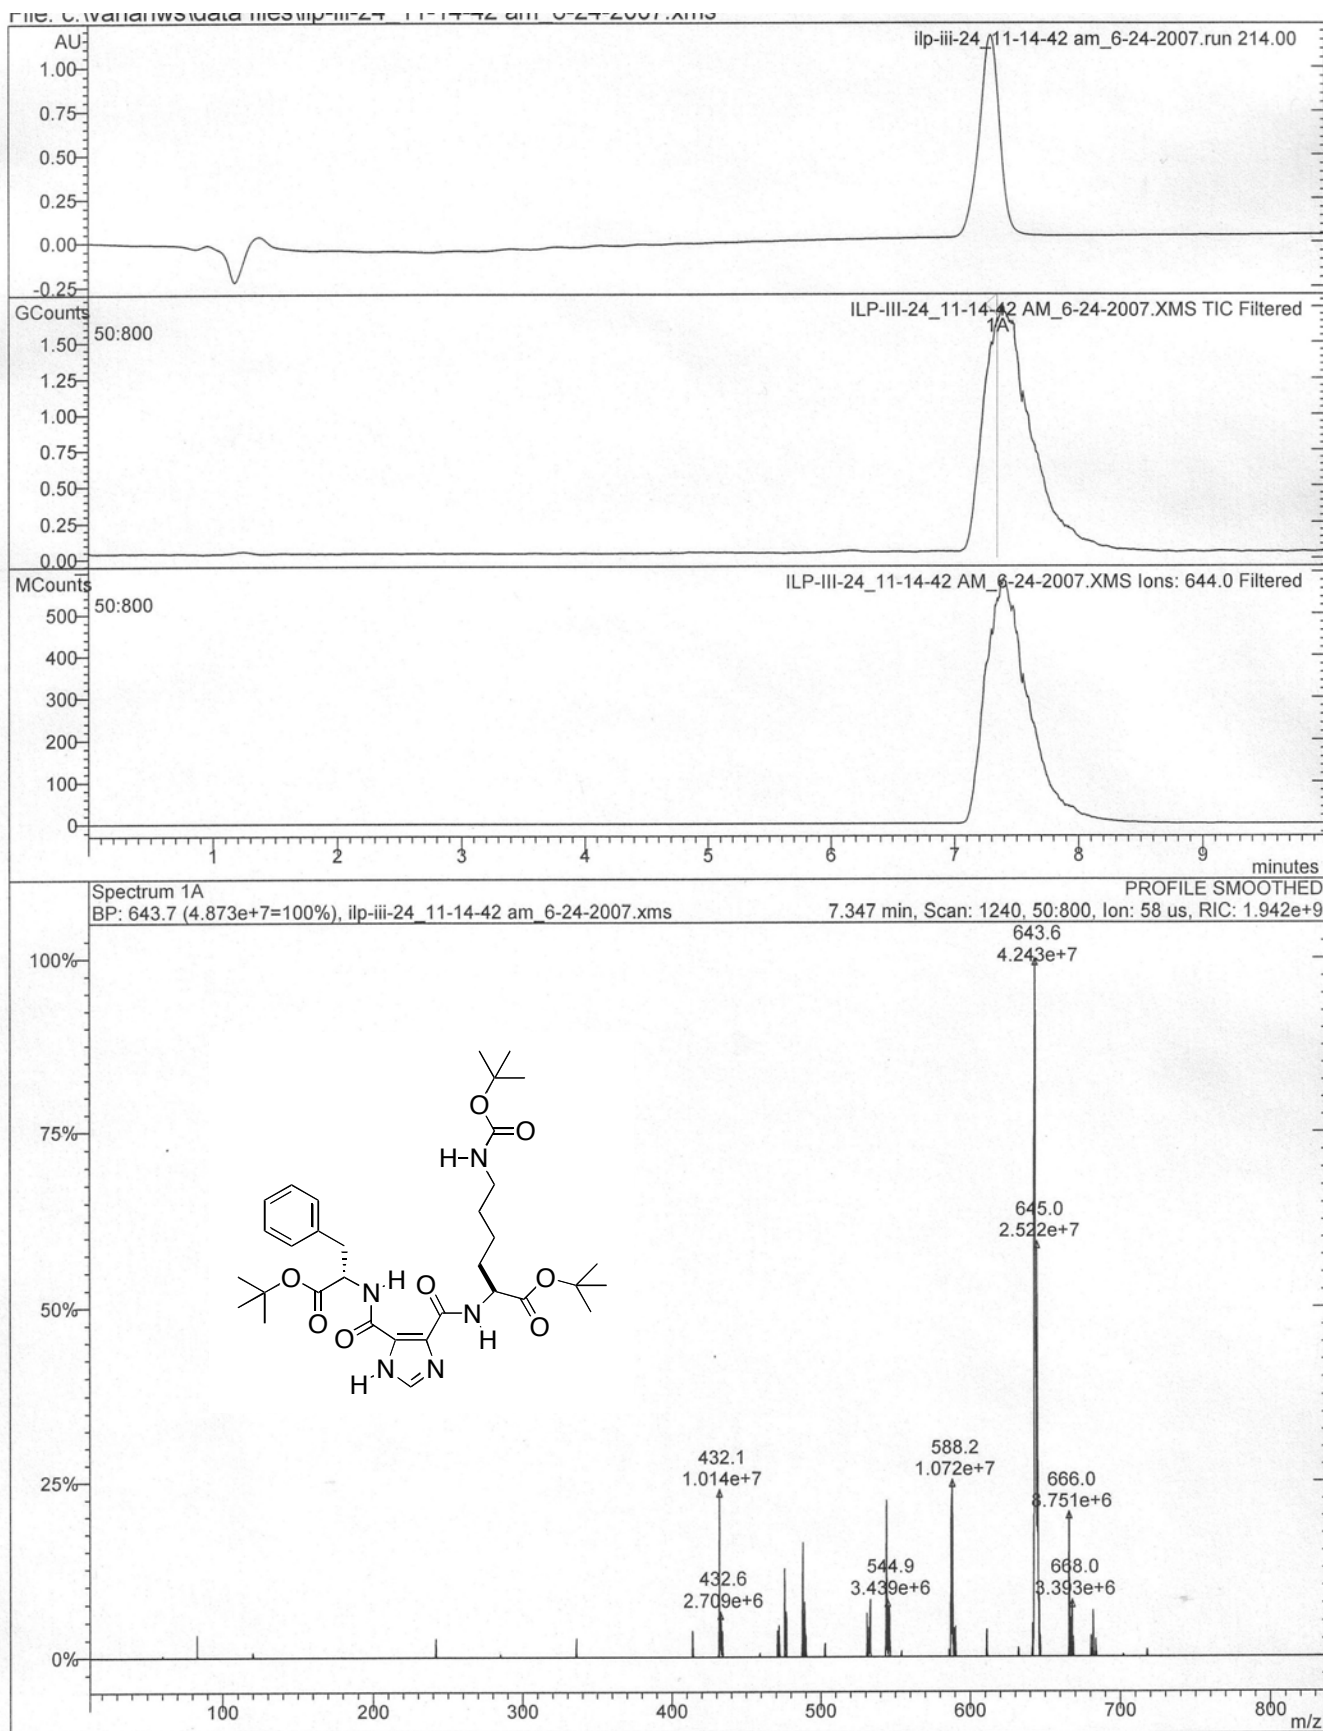

Figure S44. LC/MS data for 4{44}.

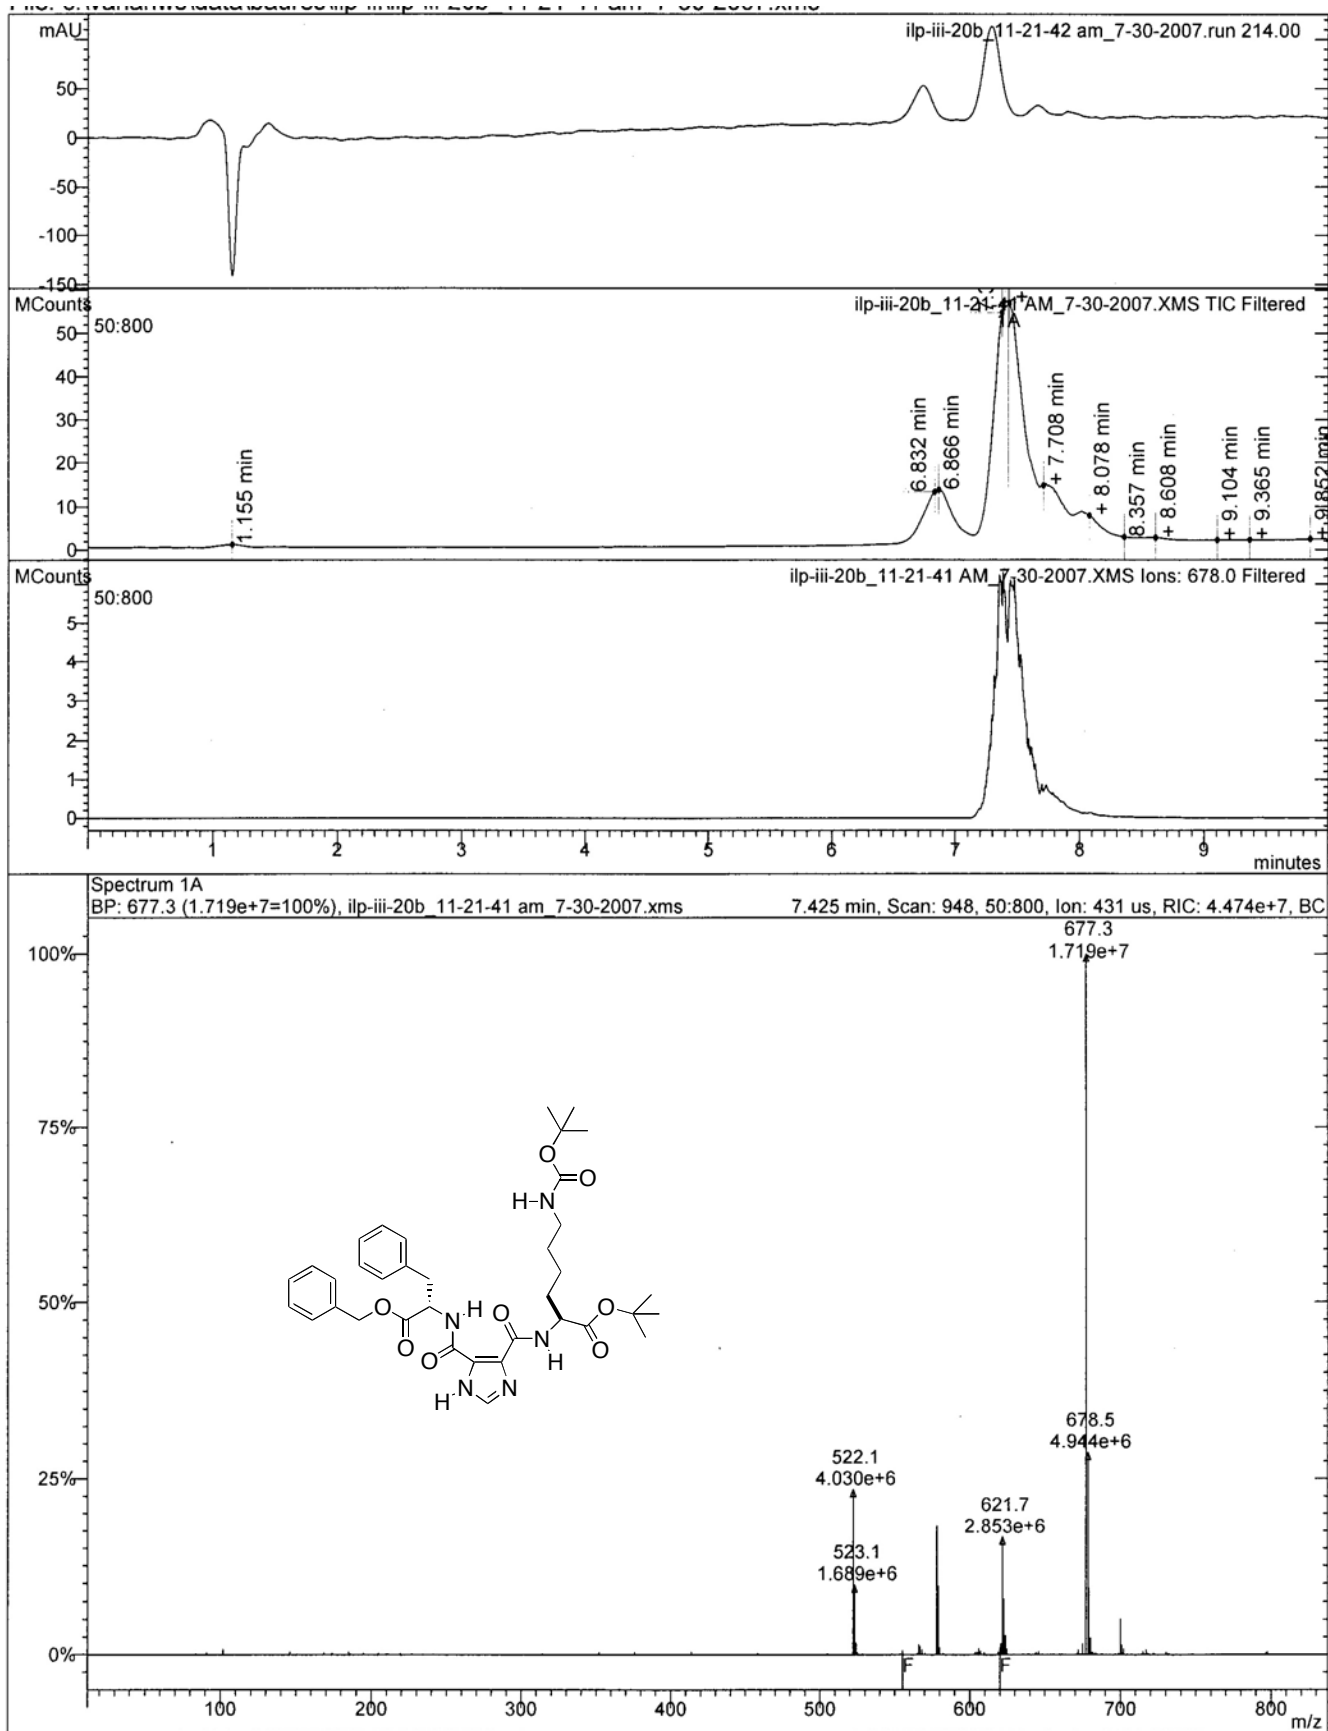

Figure S45. LC/MS data for 4{45}.

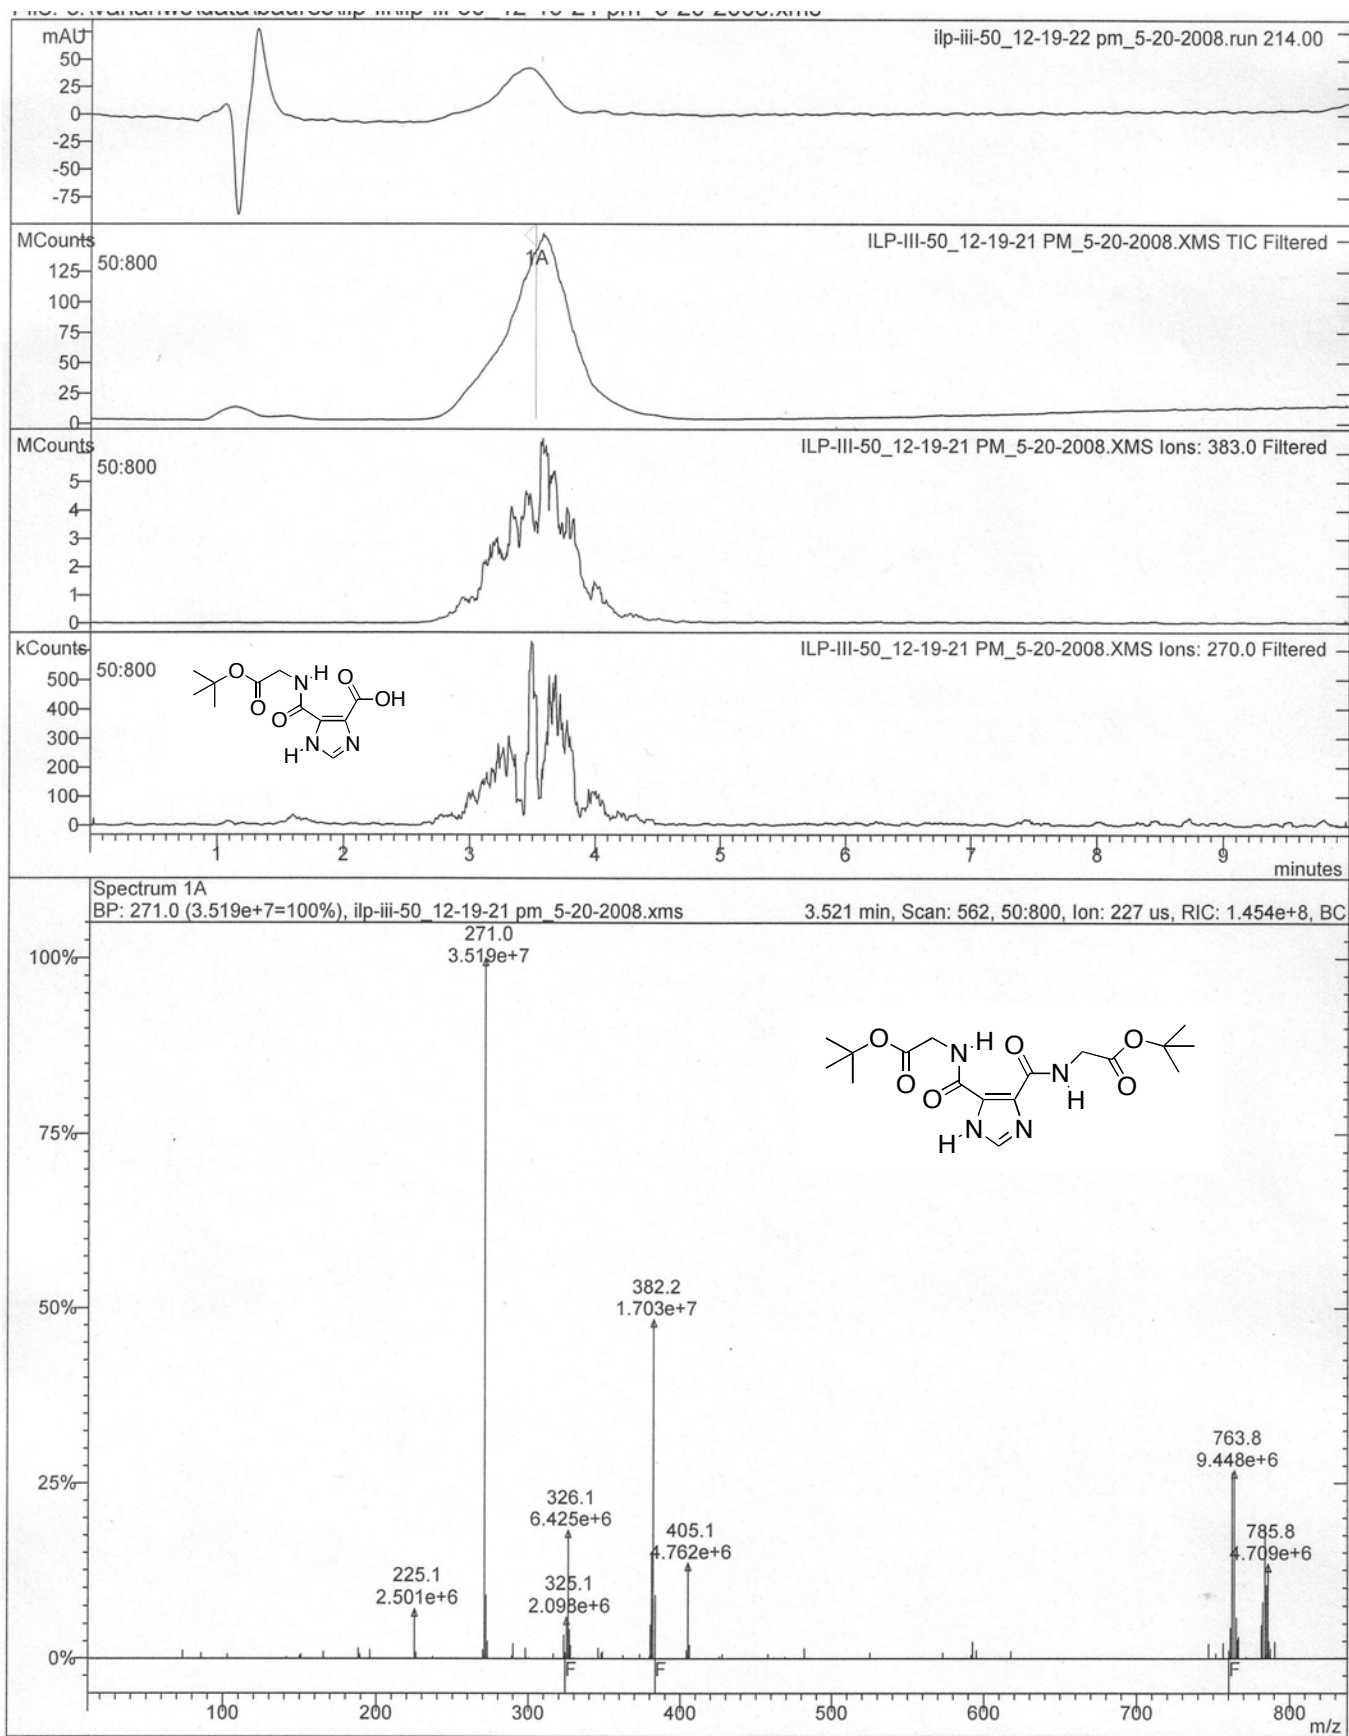

**Figure S46.** LC/MS data for the crude reaction to yield 4{1}.

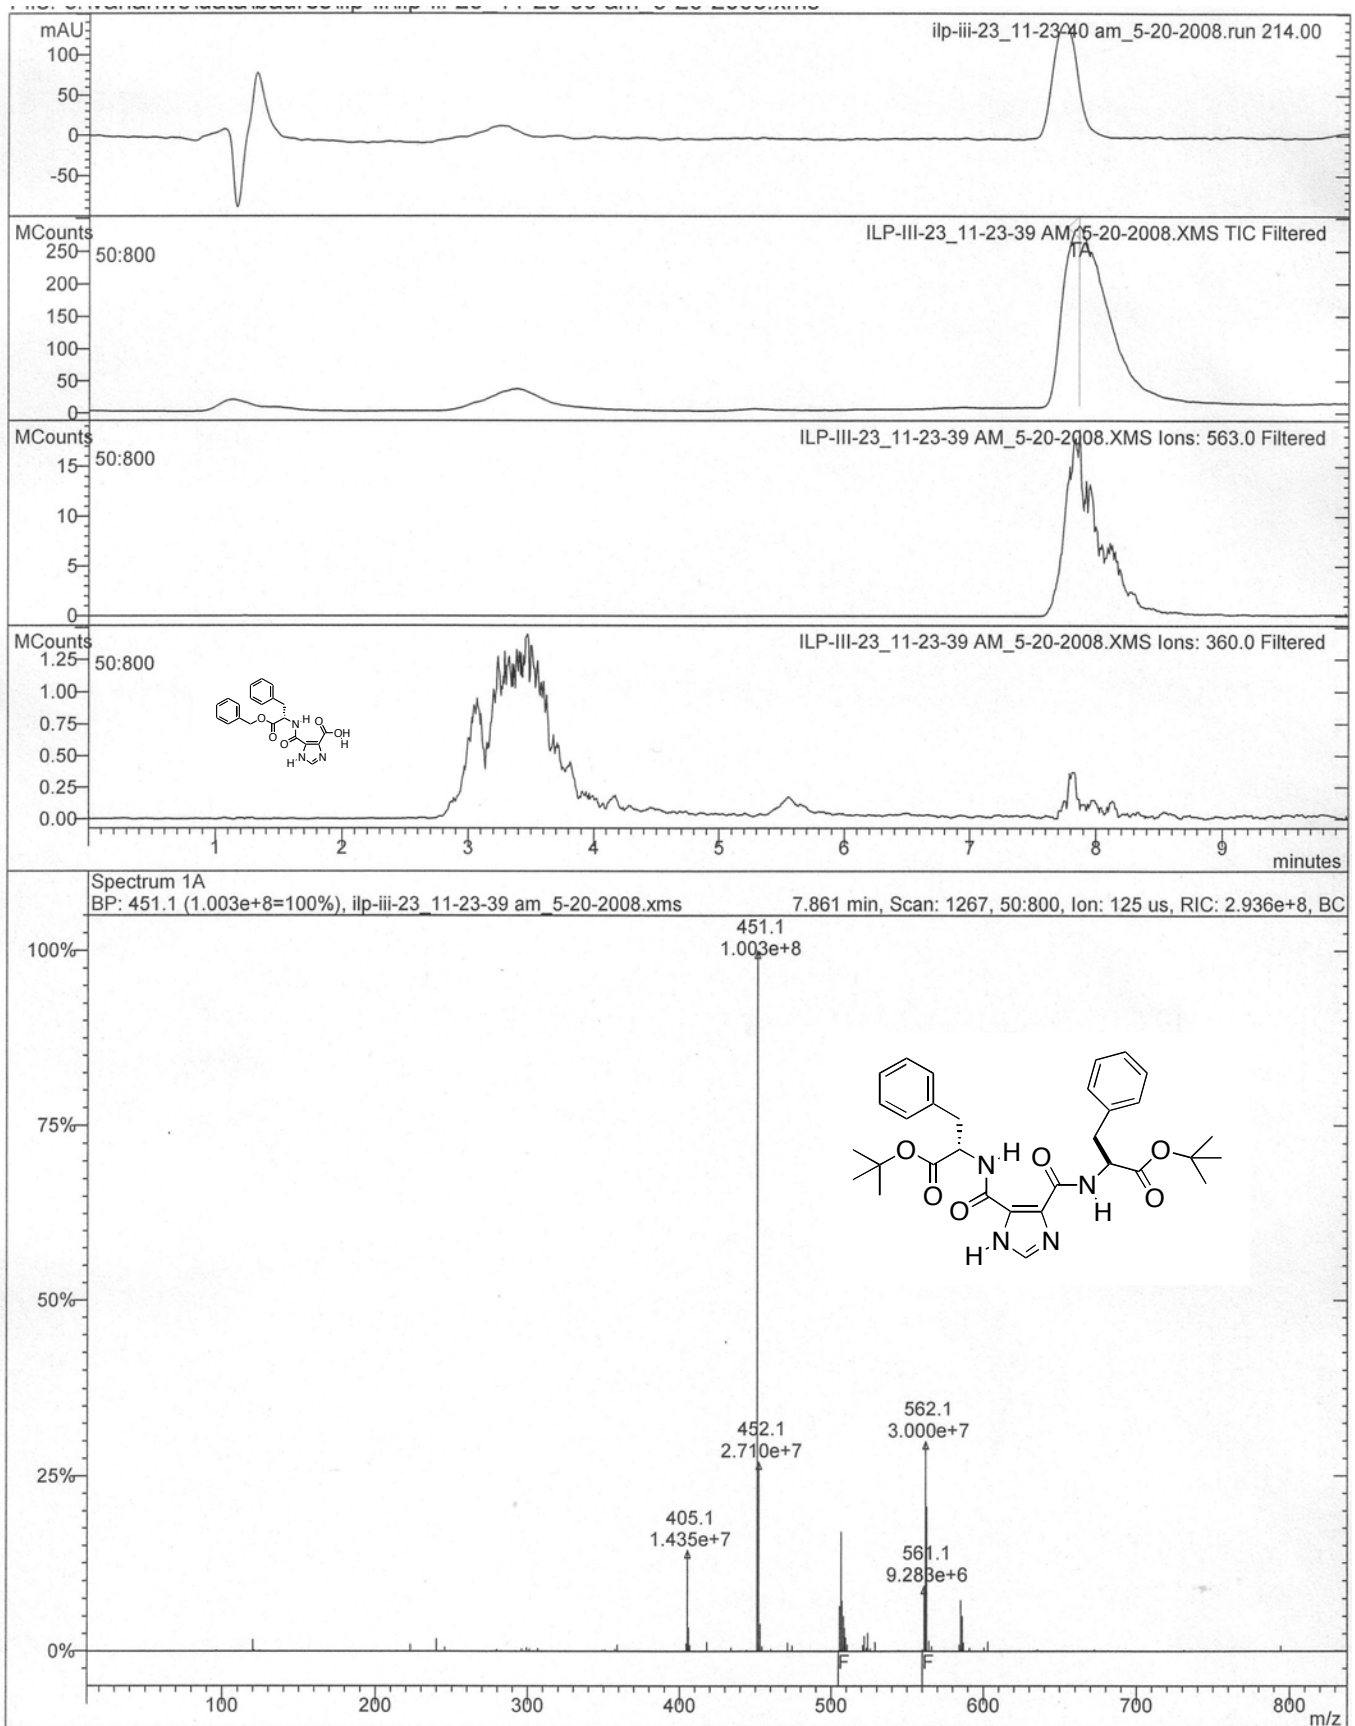

Figure S47. LC/MS data for the crude reaction to yield 4{7}.

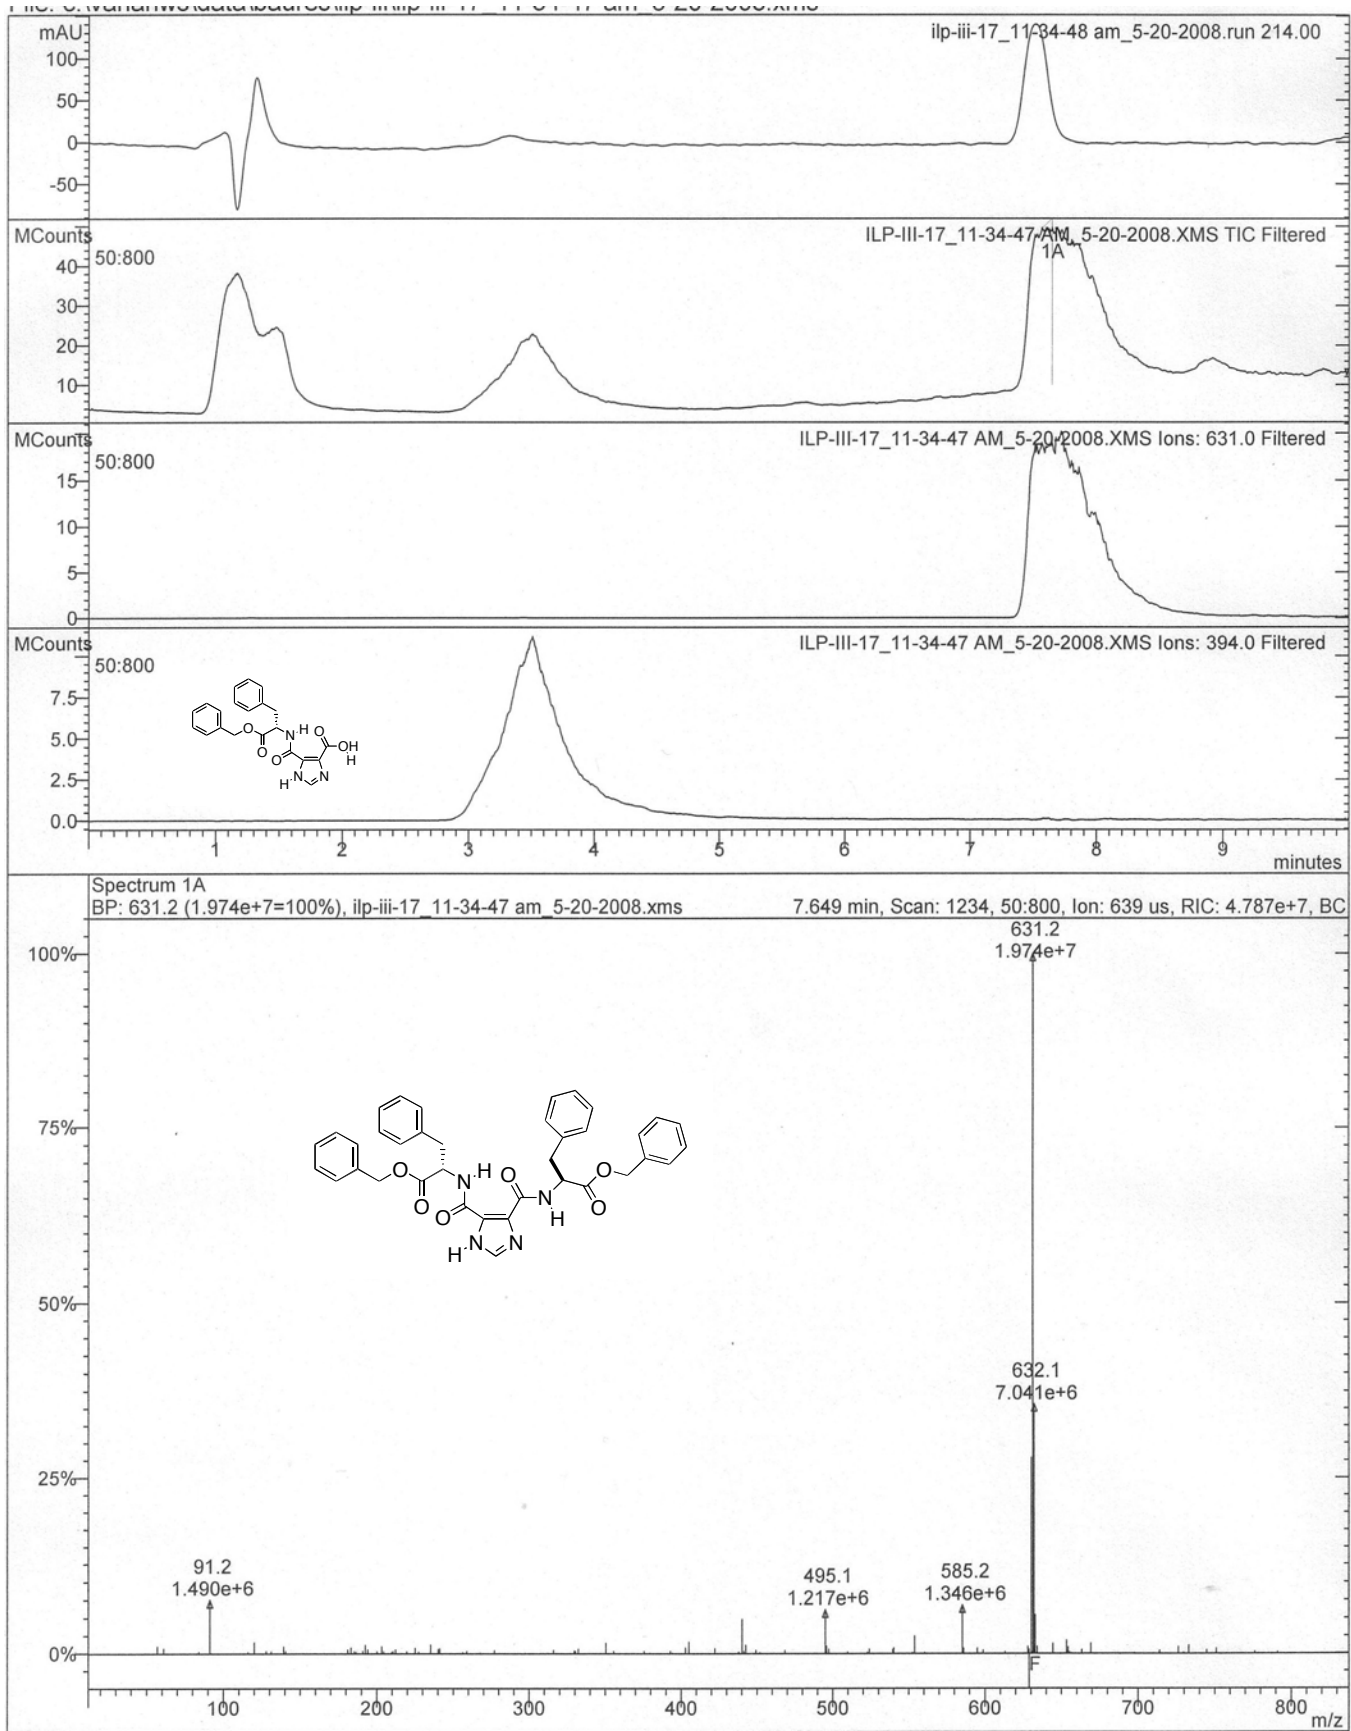

Figure S48. LC/MS data for the crude reaction to yield 4{8}.



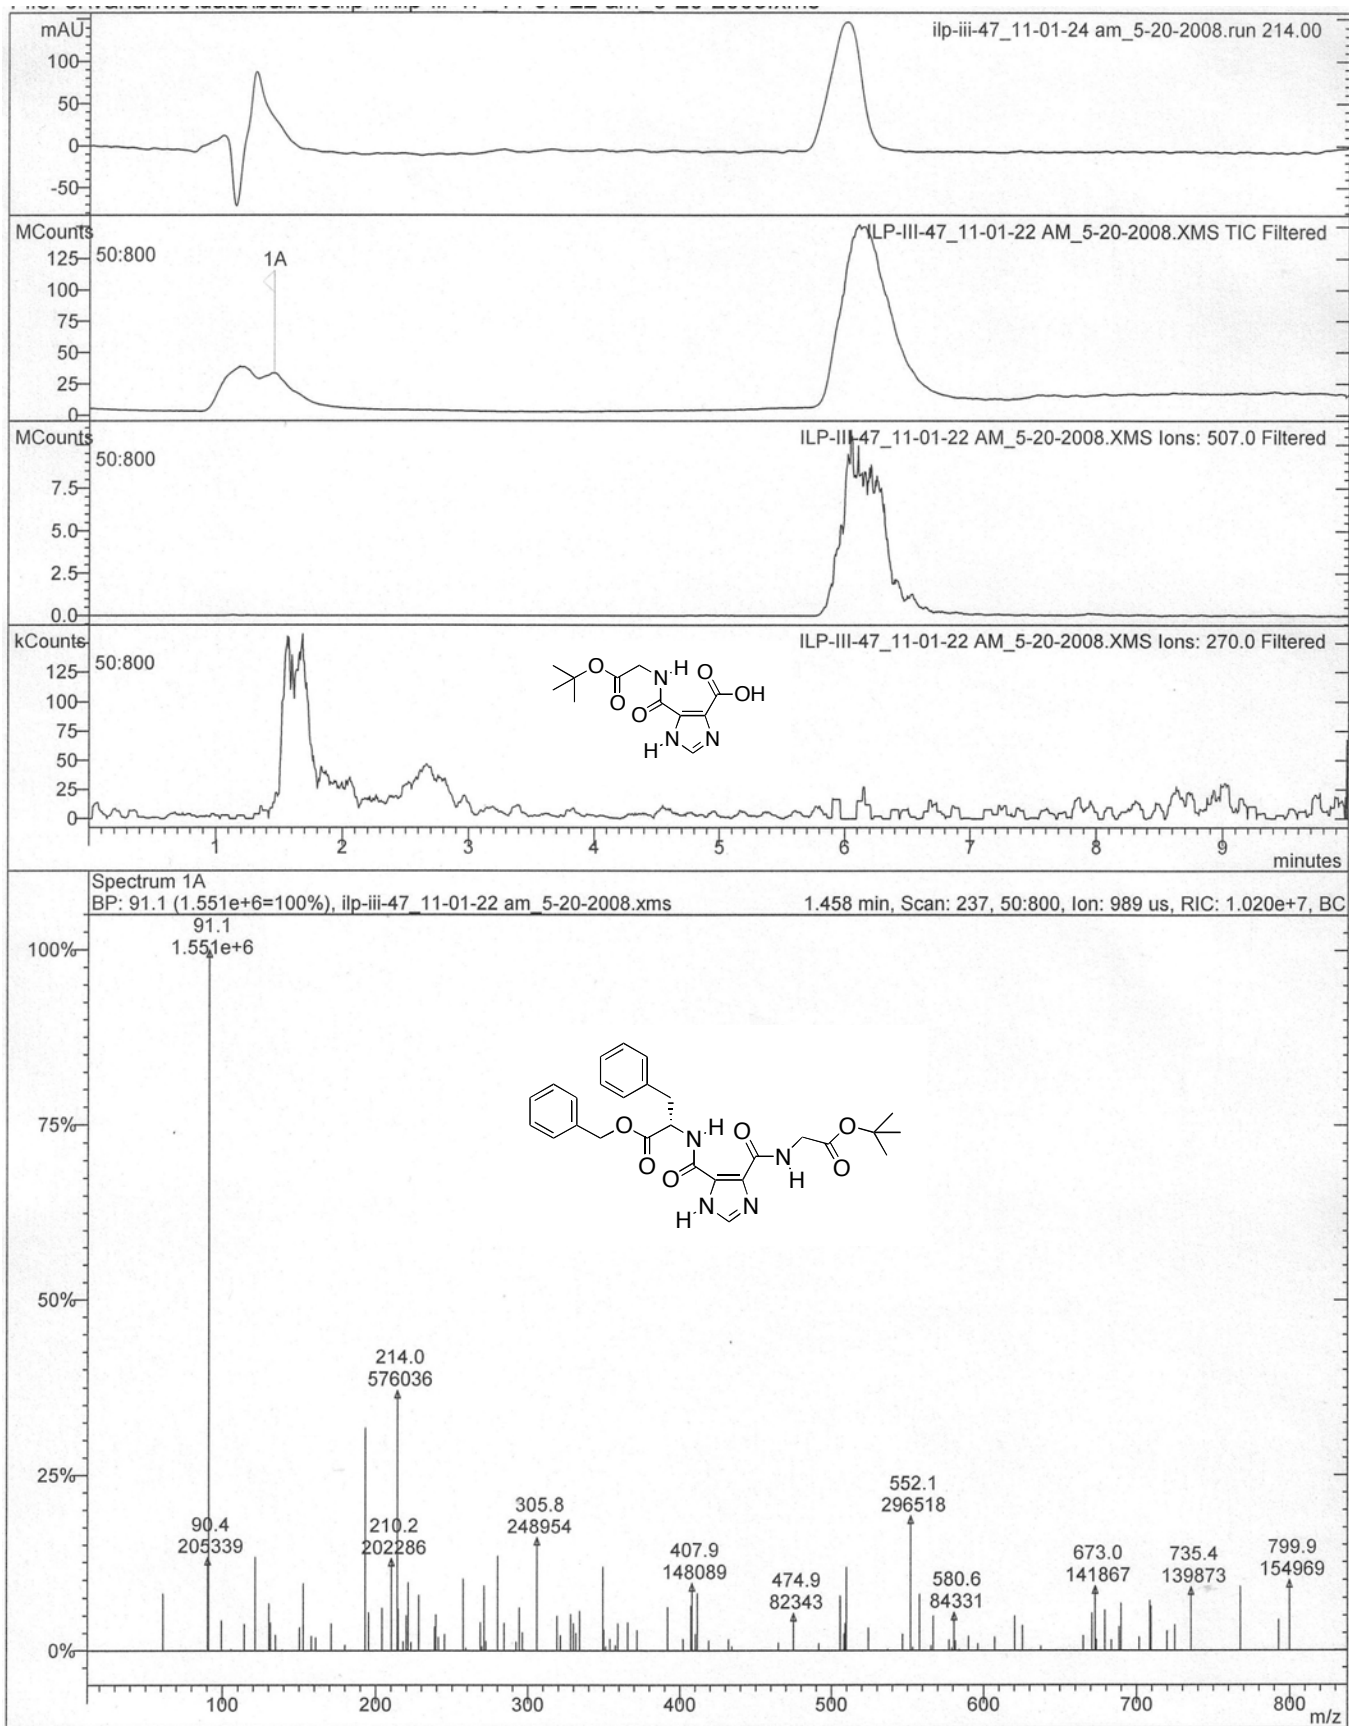

Figure S49. LC/MS data for the crude reaction to yield 4{16}.

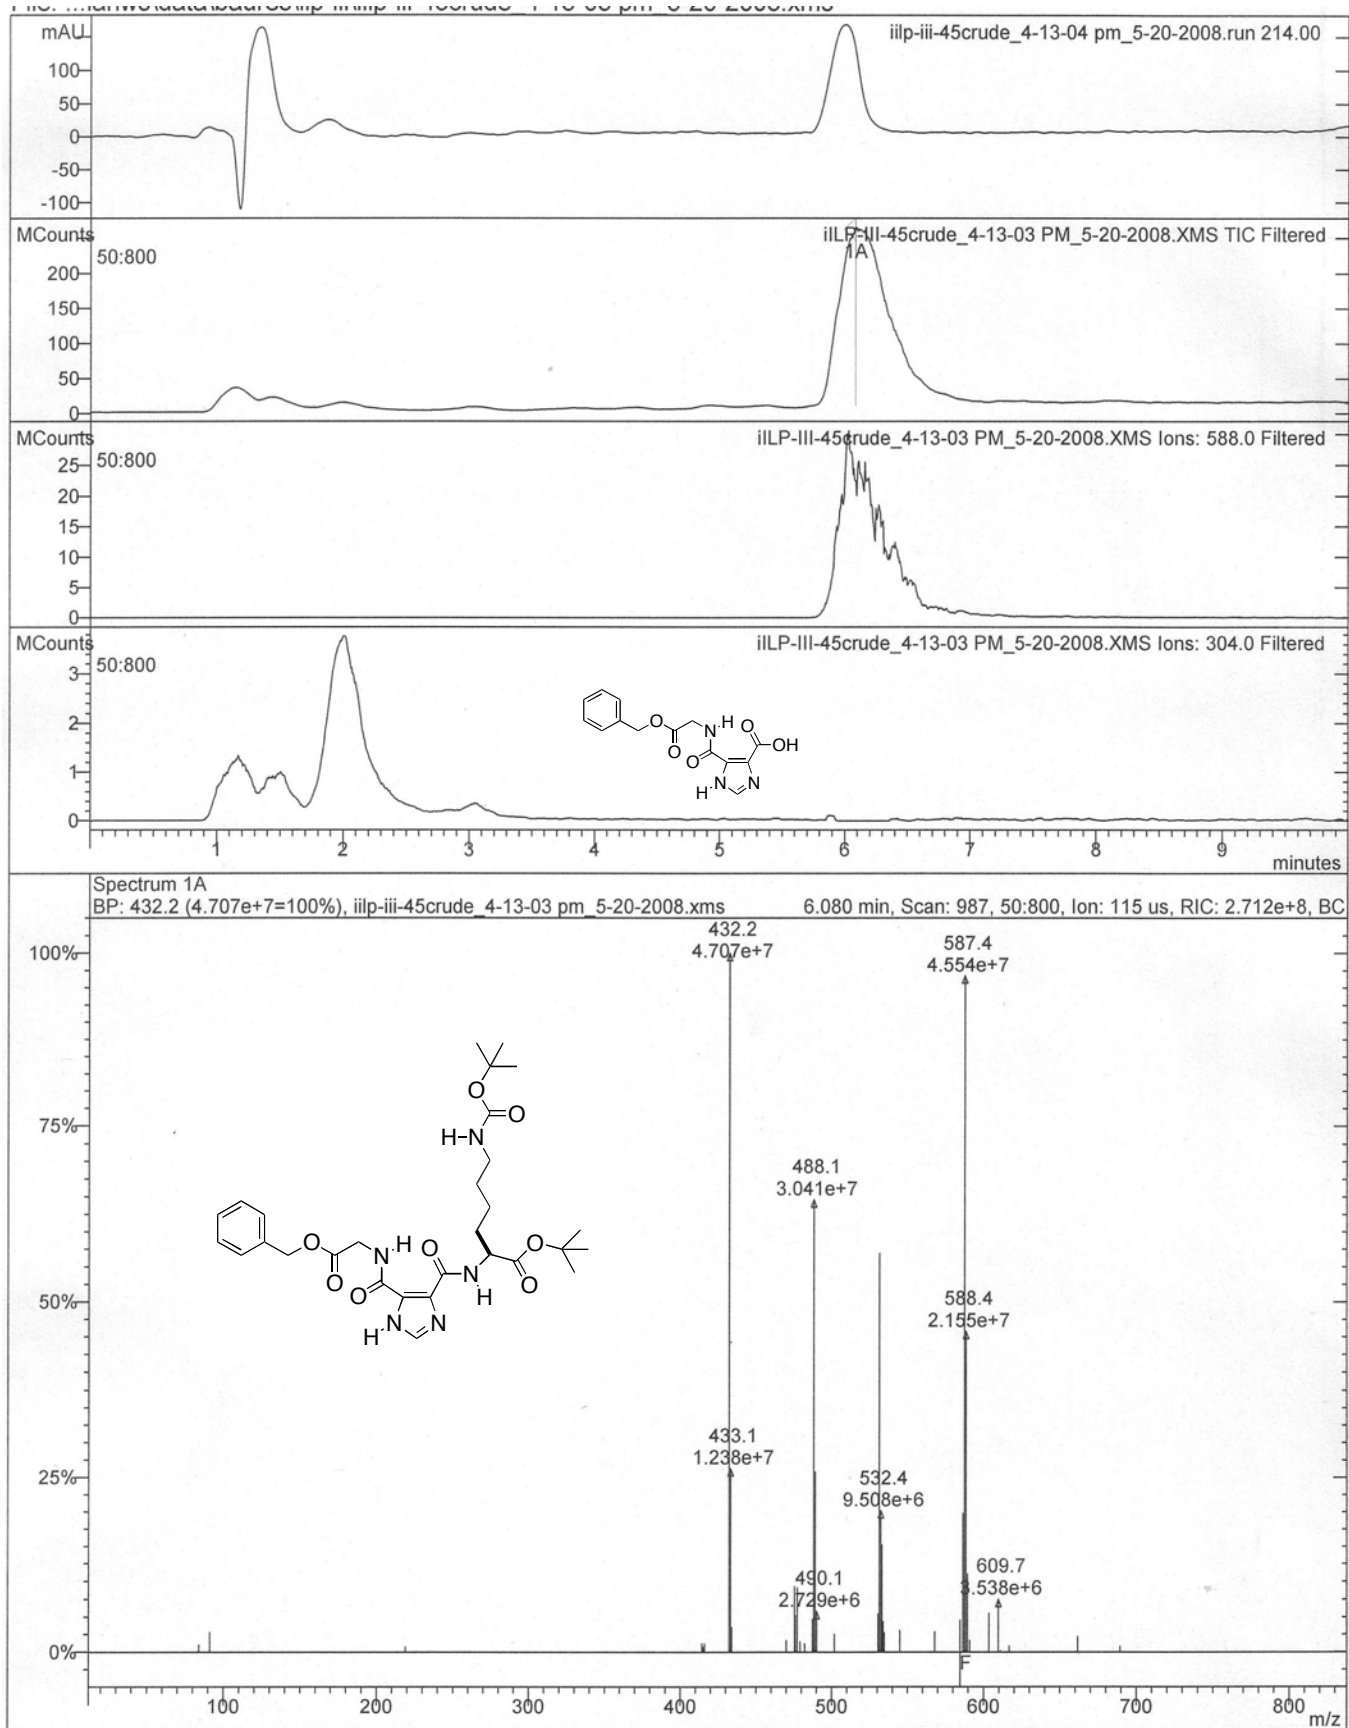

Figure S50. LC/MS data for the crude reaction to yield 4{24}.

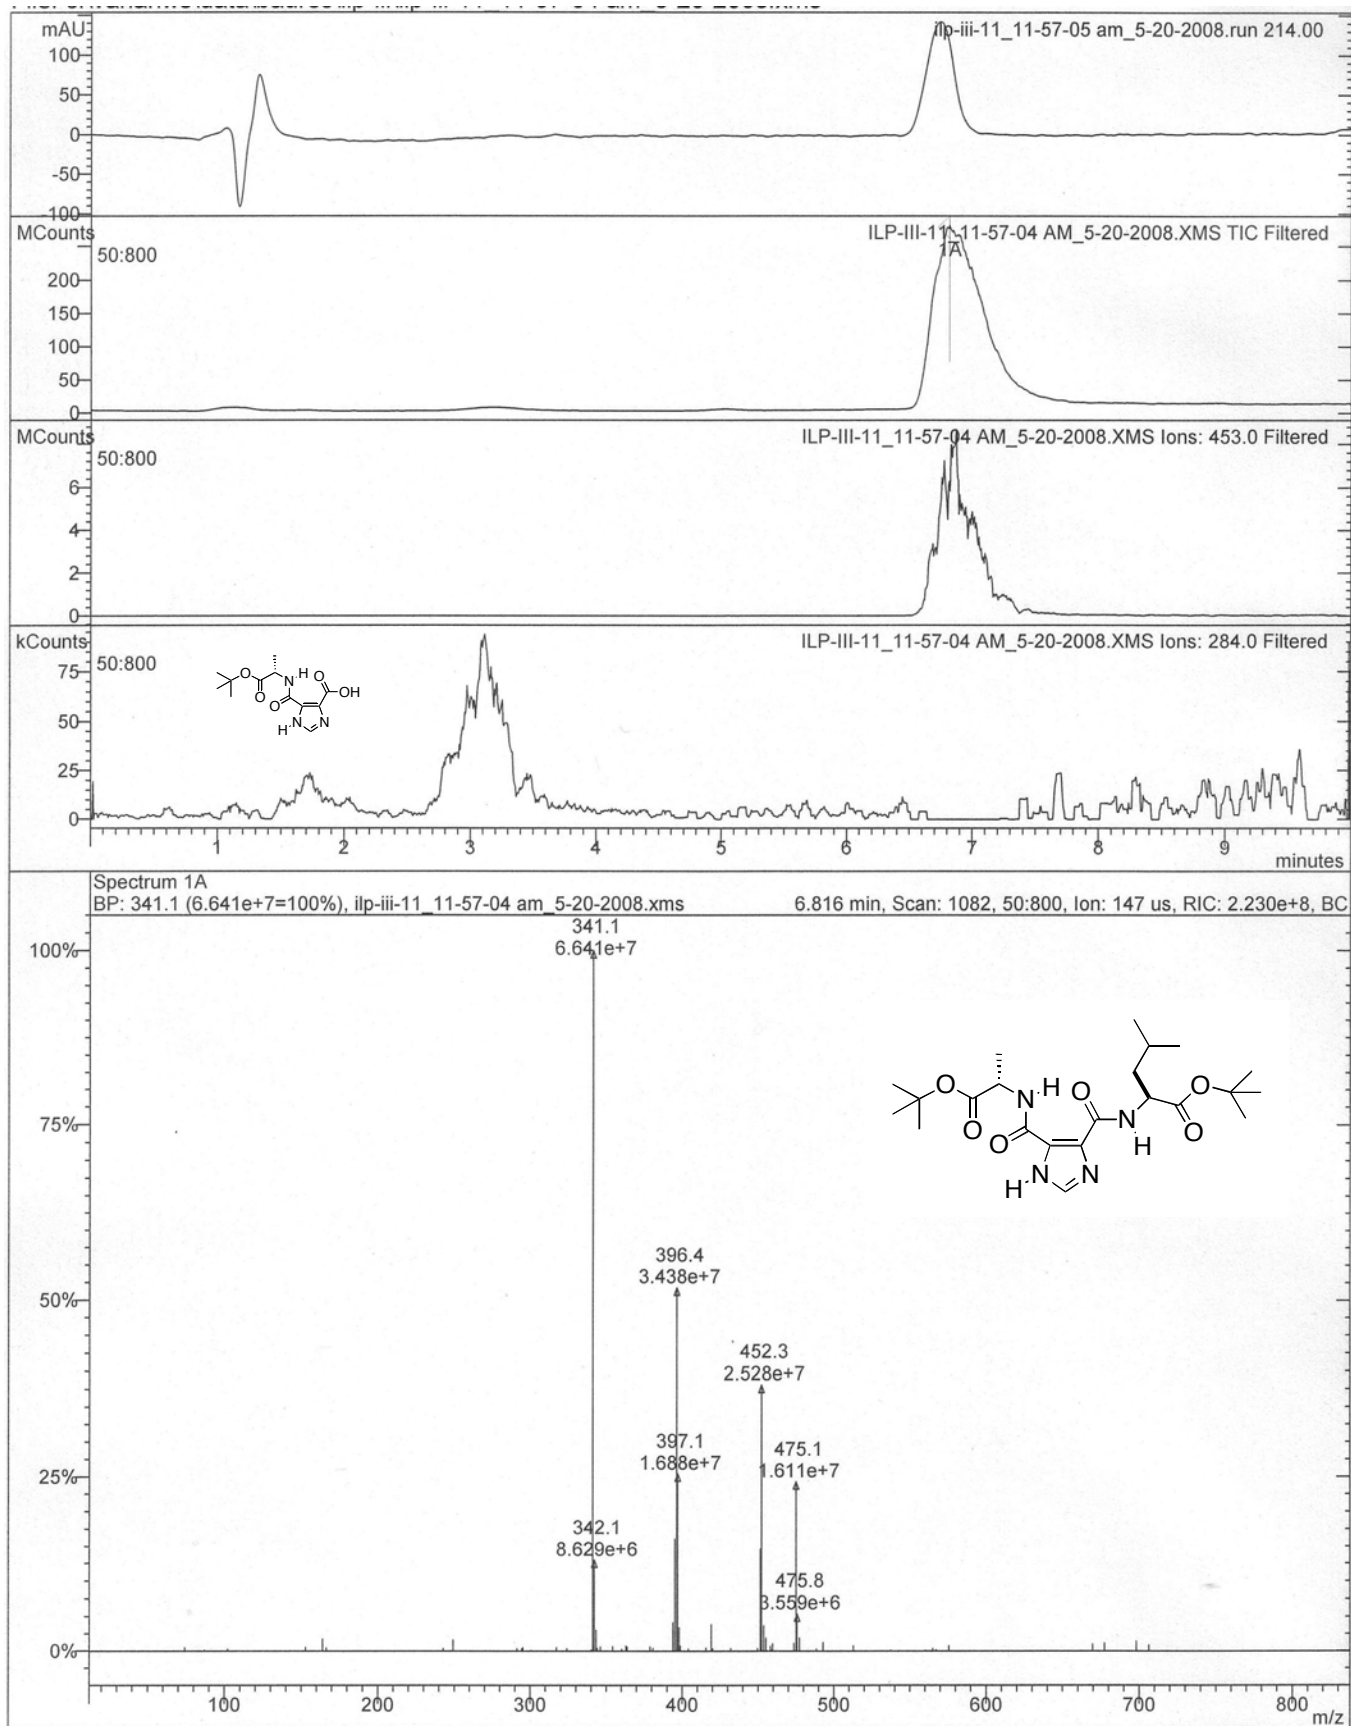

Figure S51. LC/MS data for the crude reaction to yield 4{26}.

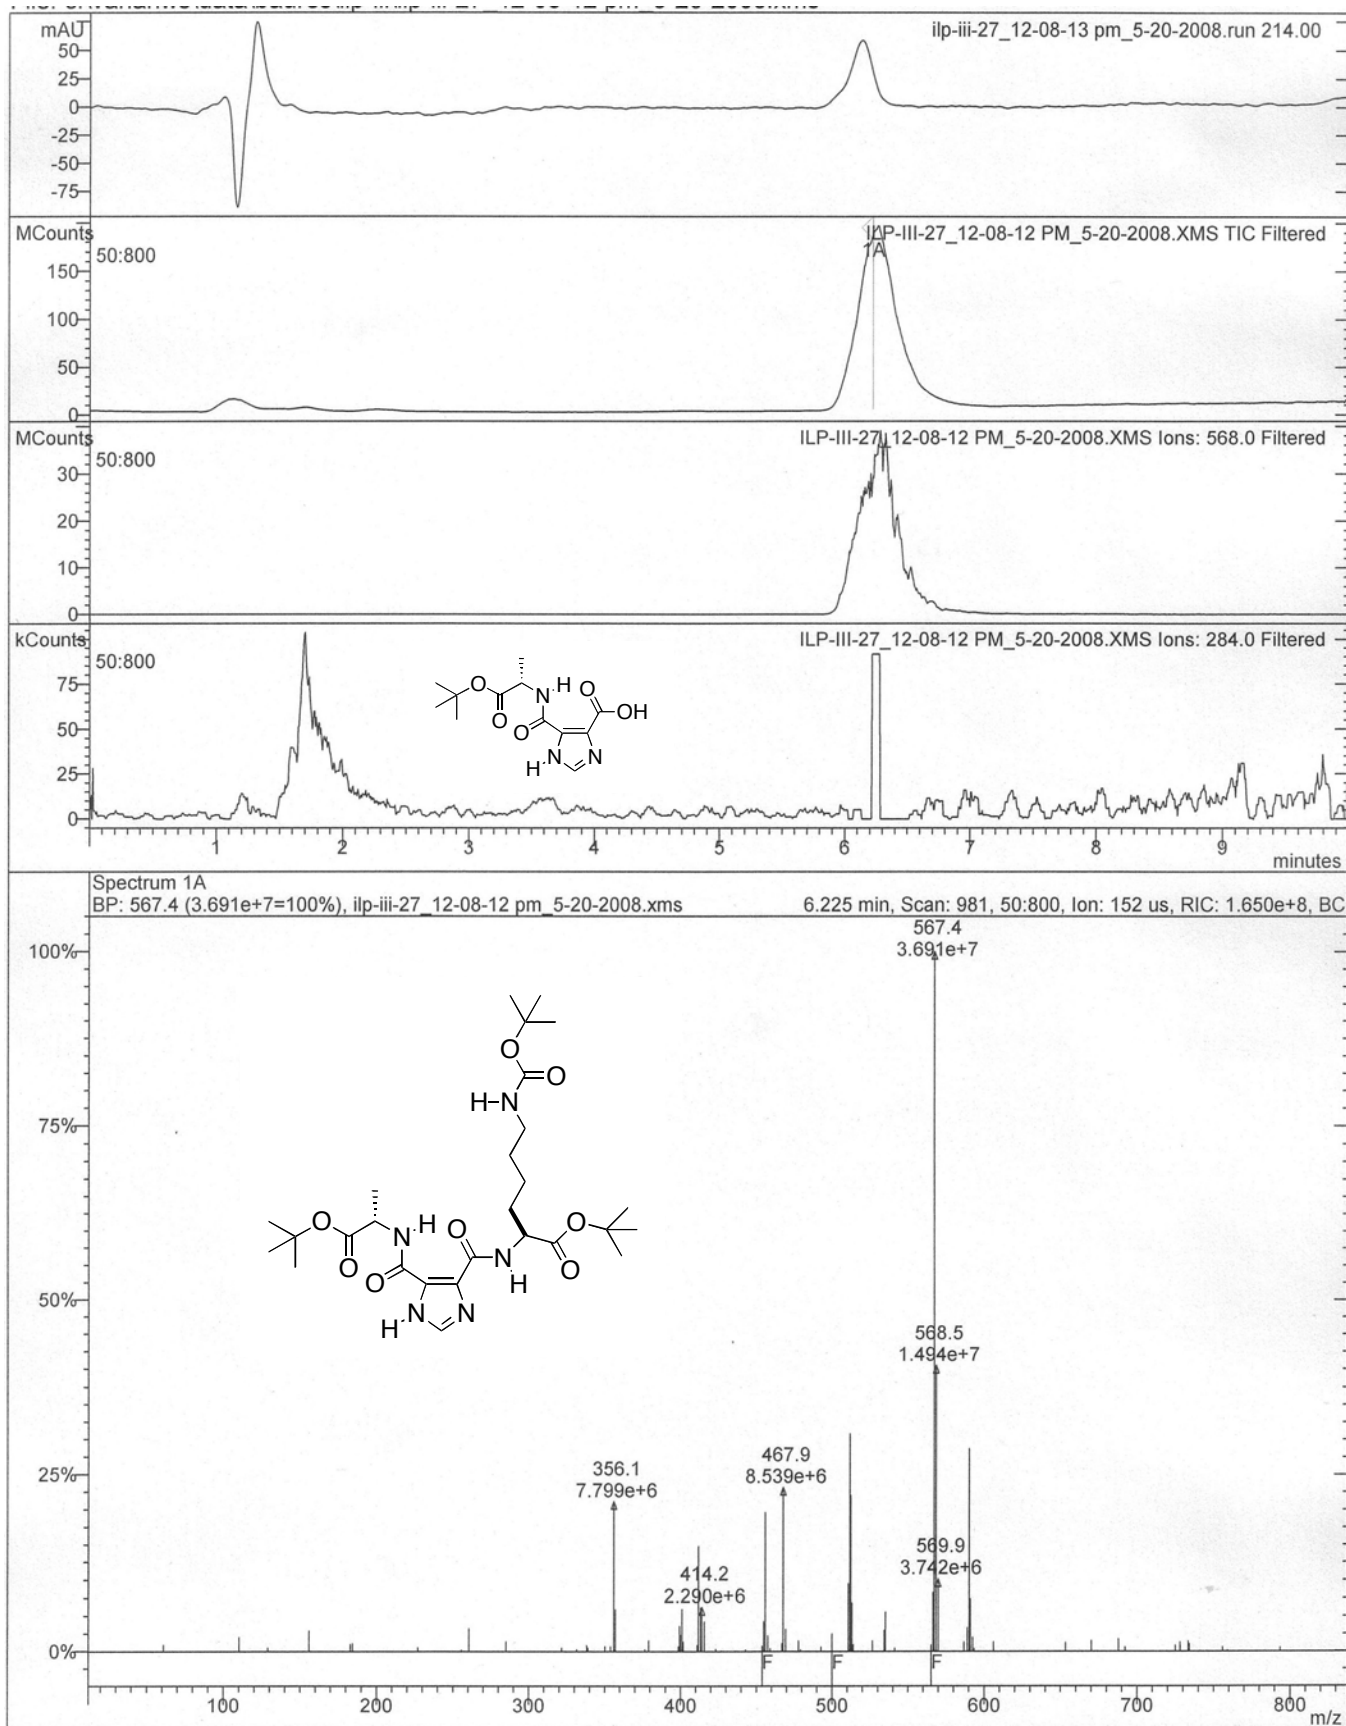

Figure S52. LC/MS data for the crude reaction to yield 4{30}.

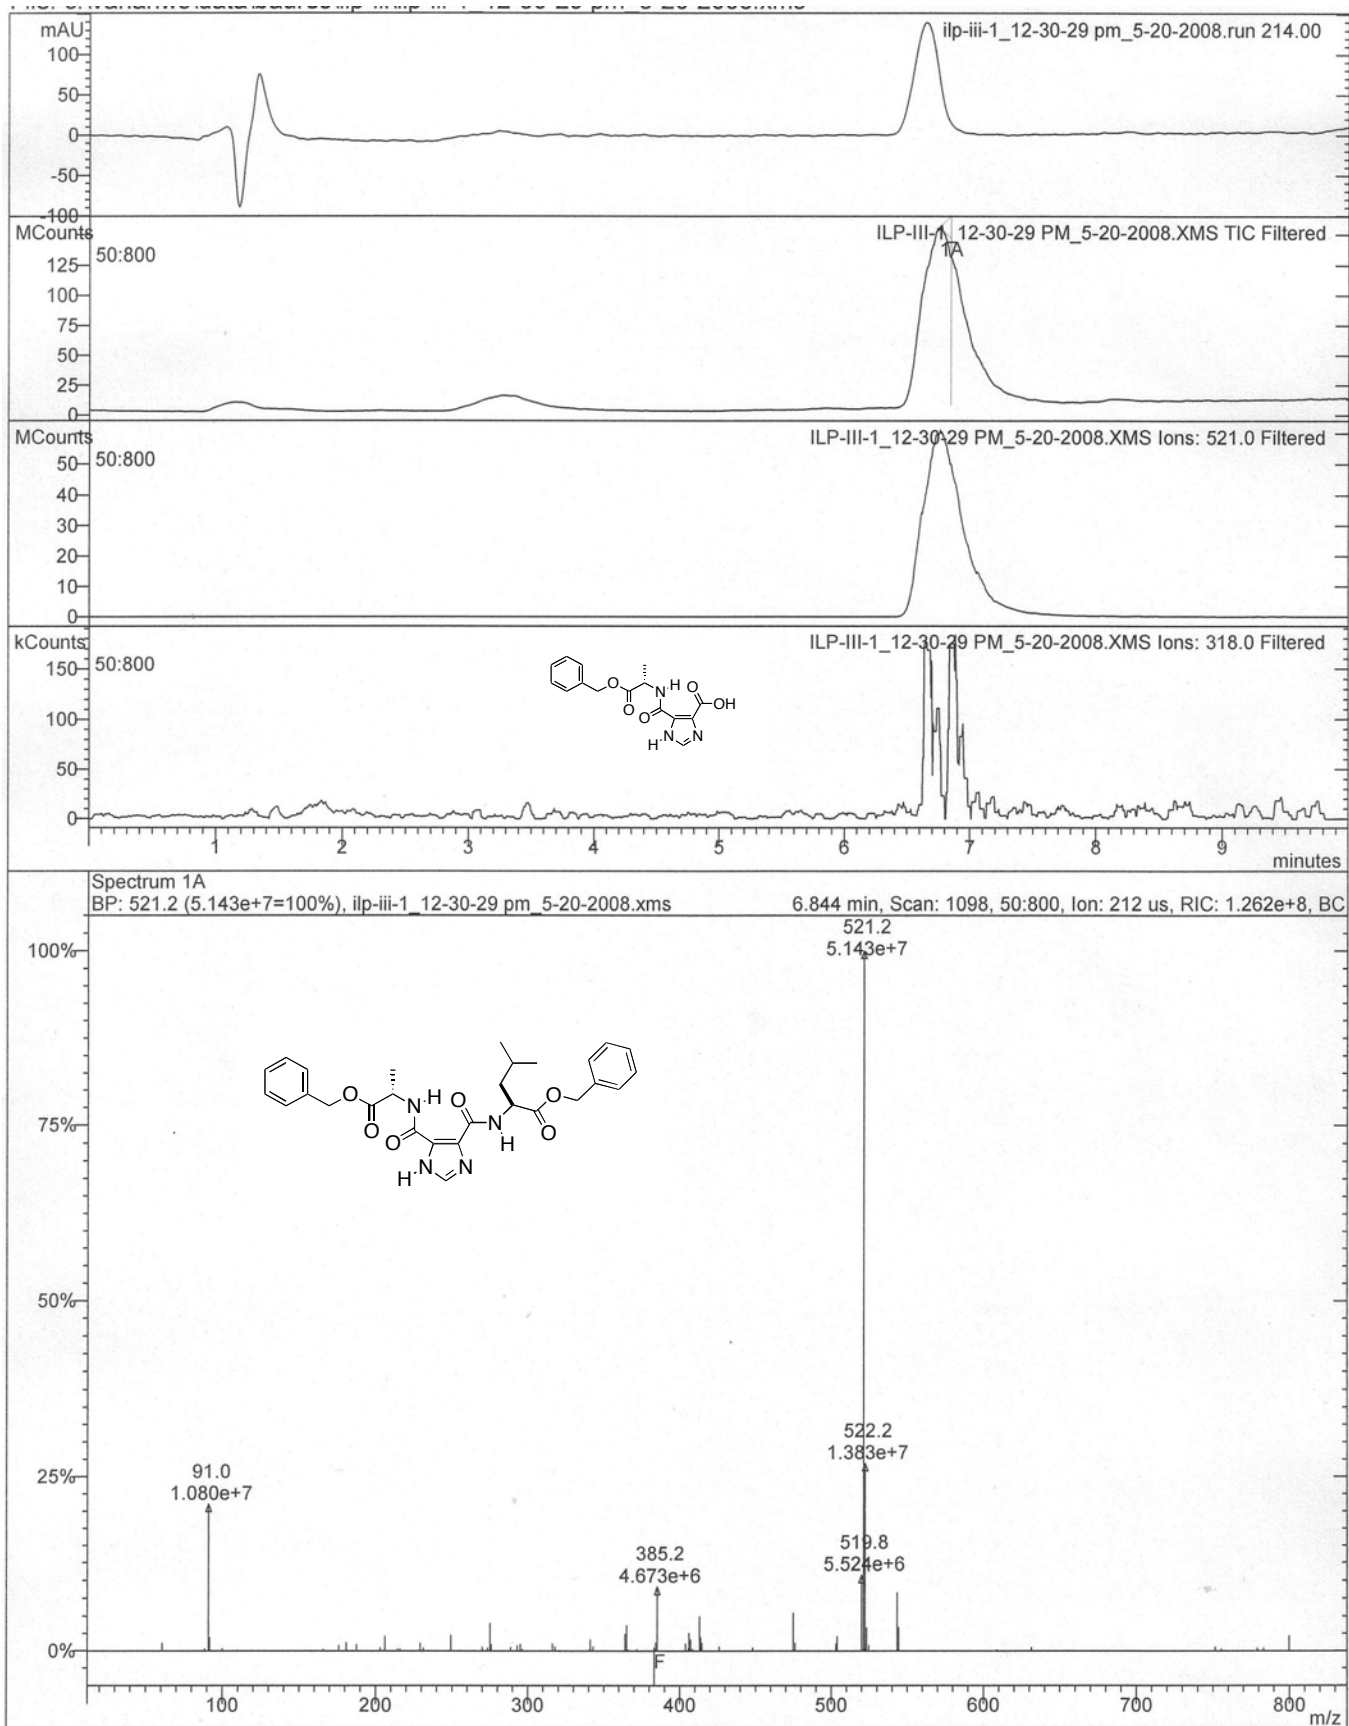

Figure S53. LC/MS data for the crude reaction to yield 4{32}.

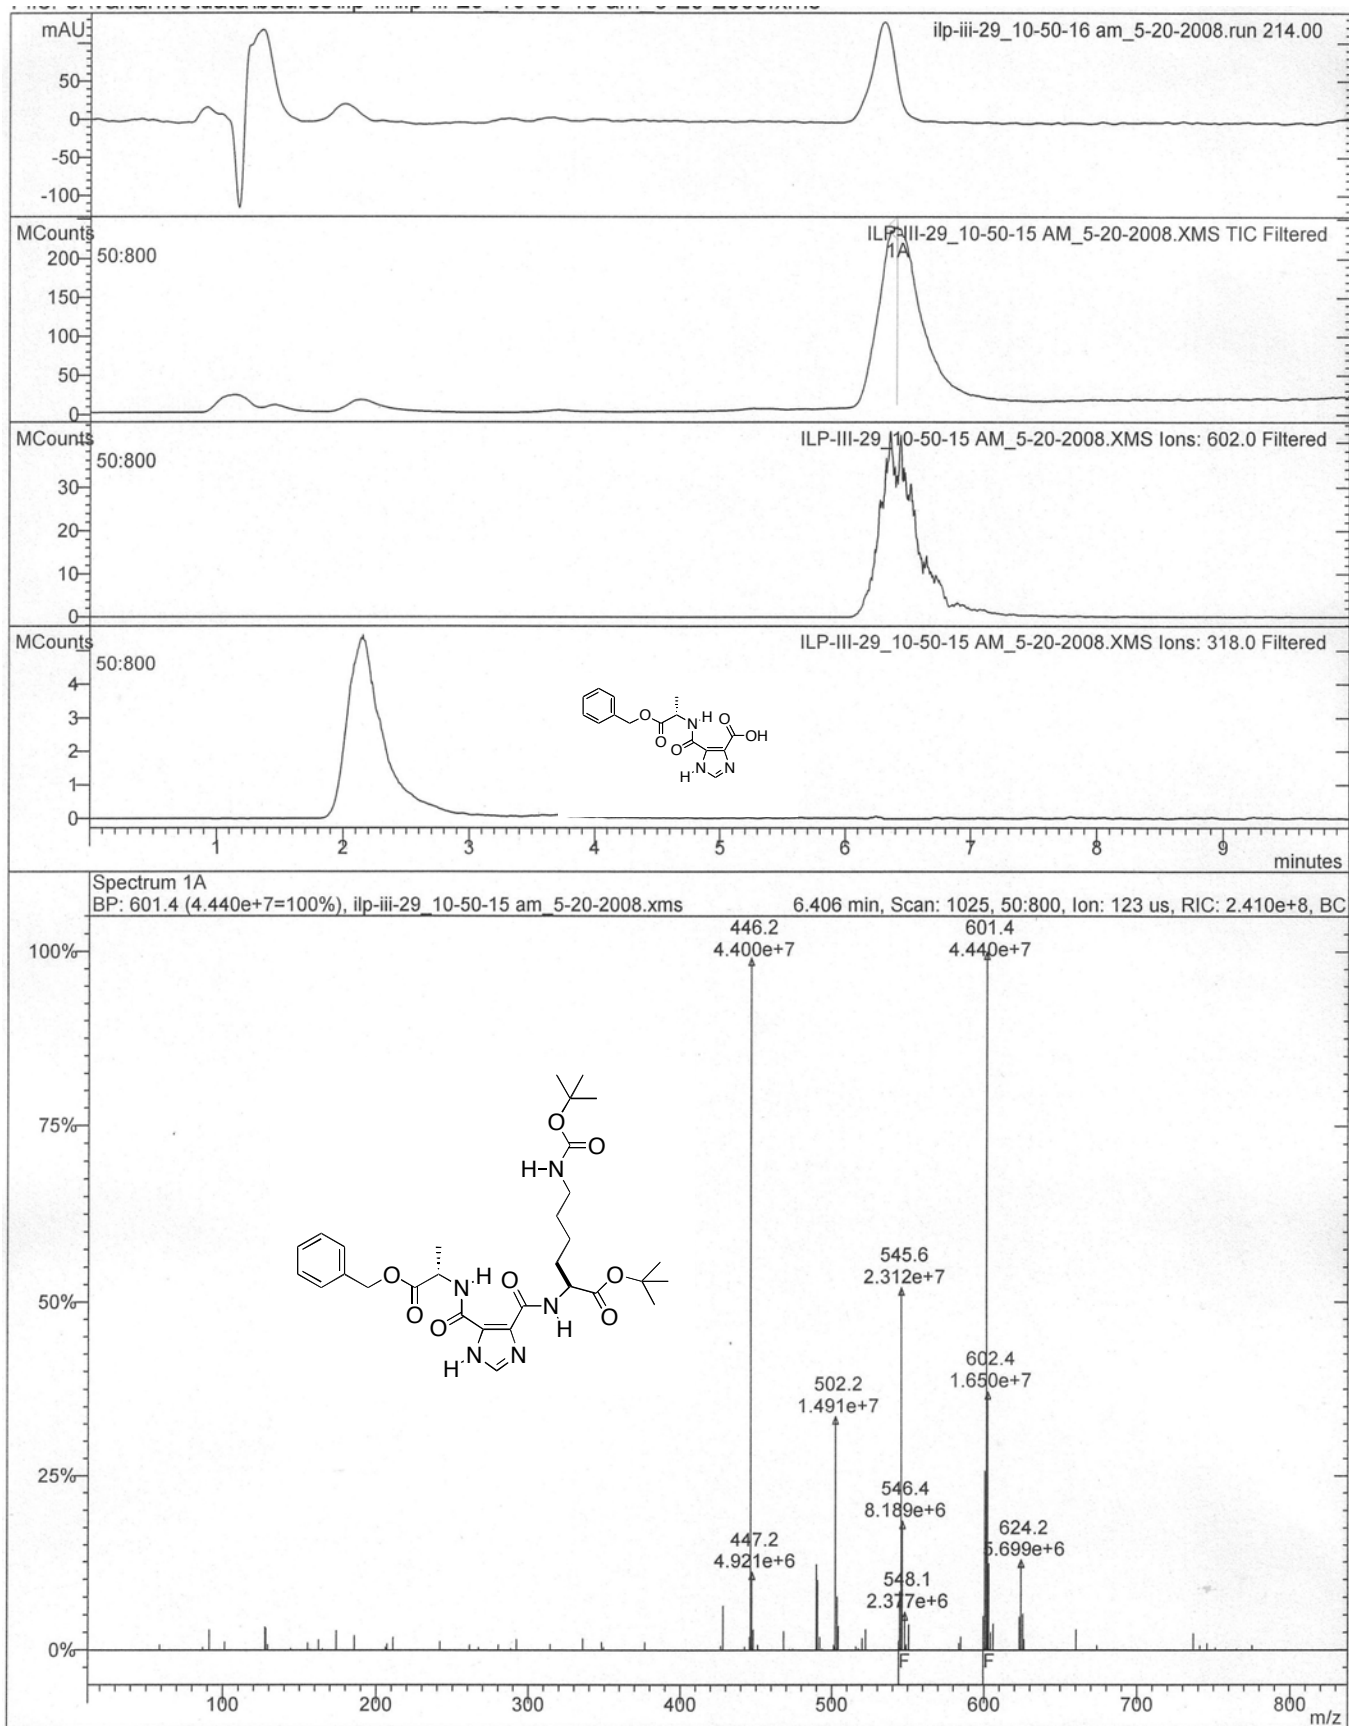

Figure S54. LC/MS data for the crude reaction to yield 4{35}.



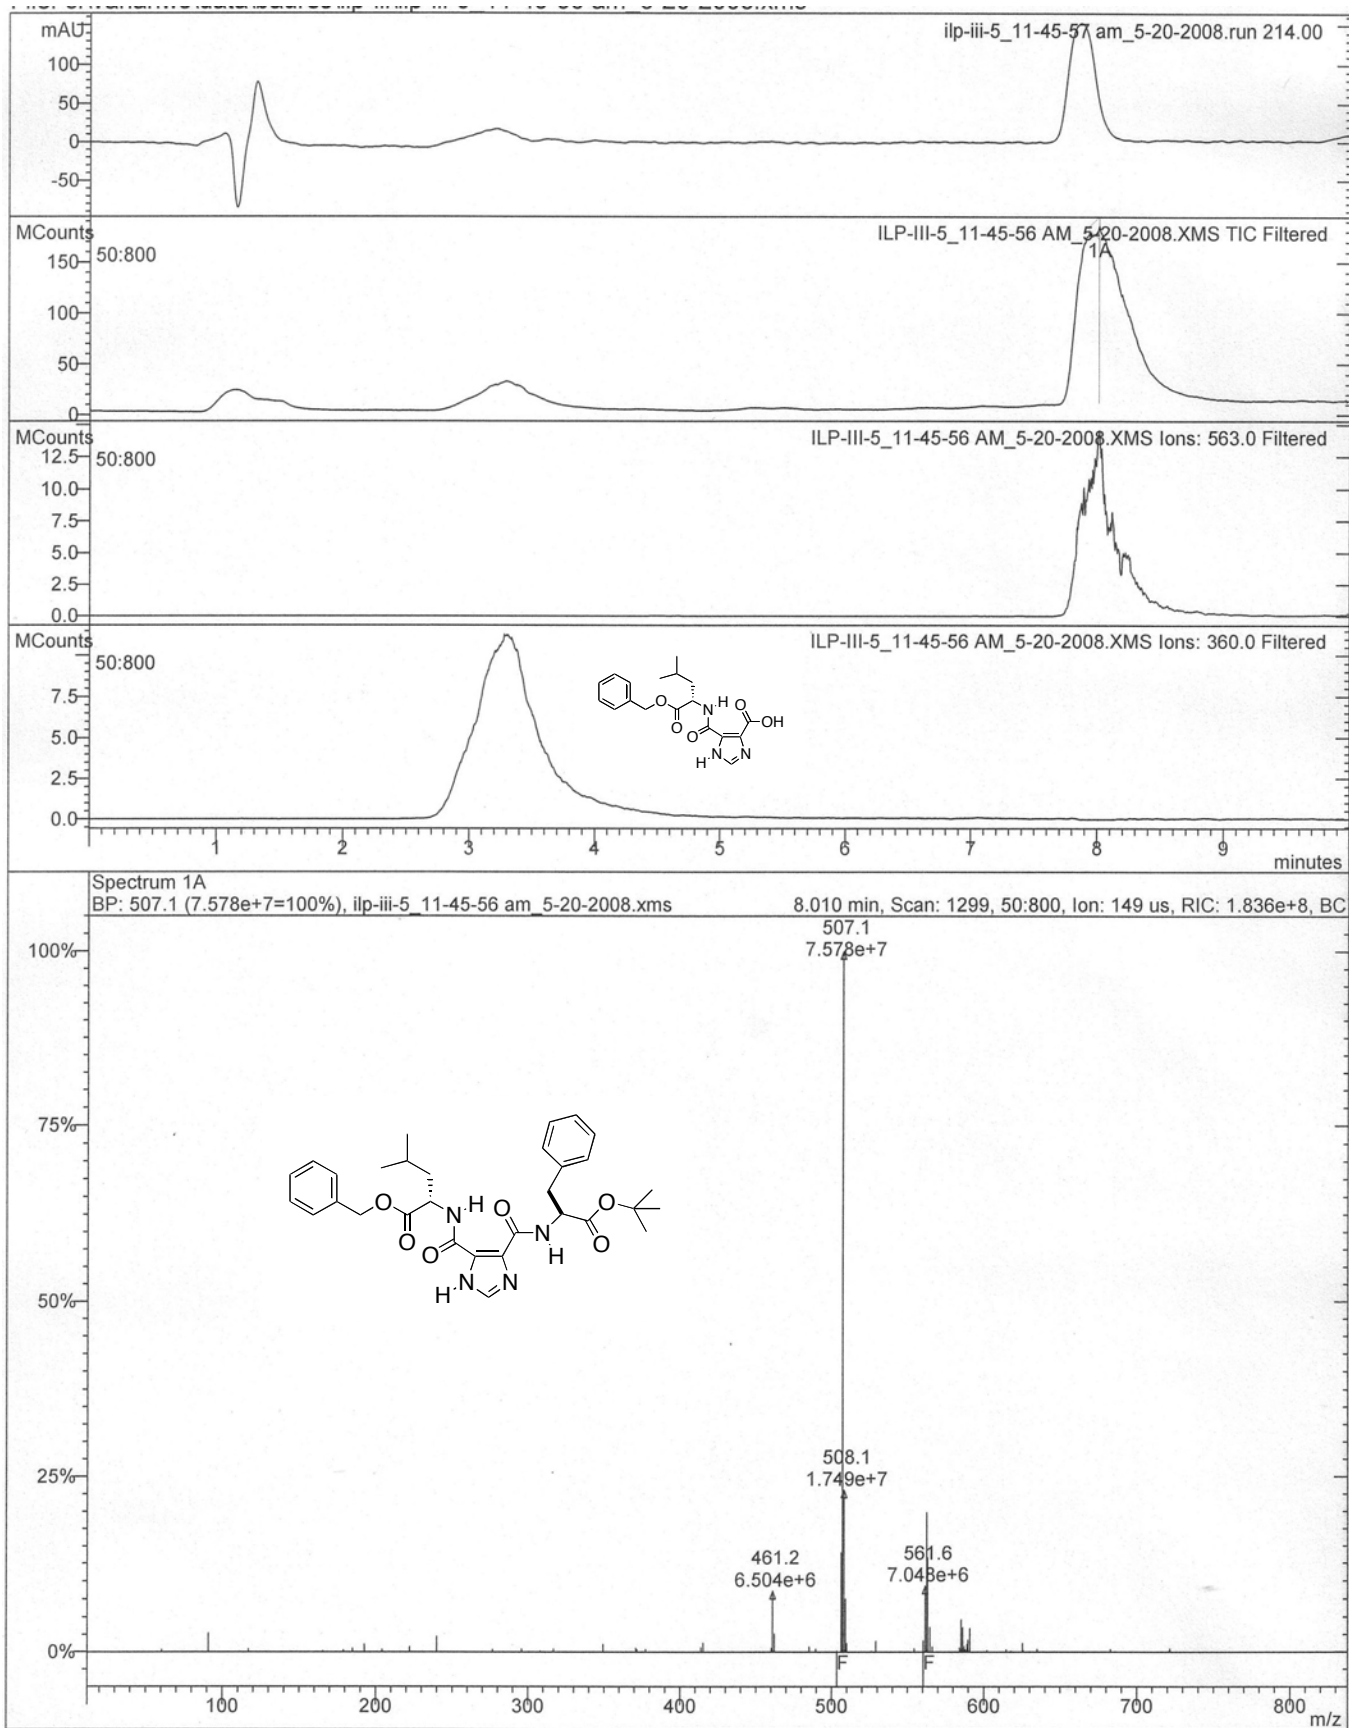

**Figure S55.** LC/MS data for the crude reaction to yield 4{40}.

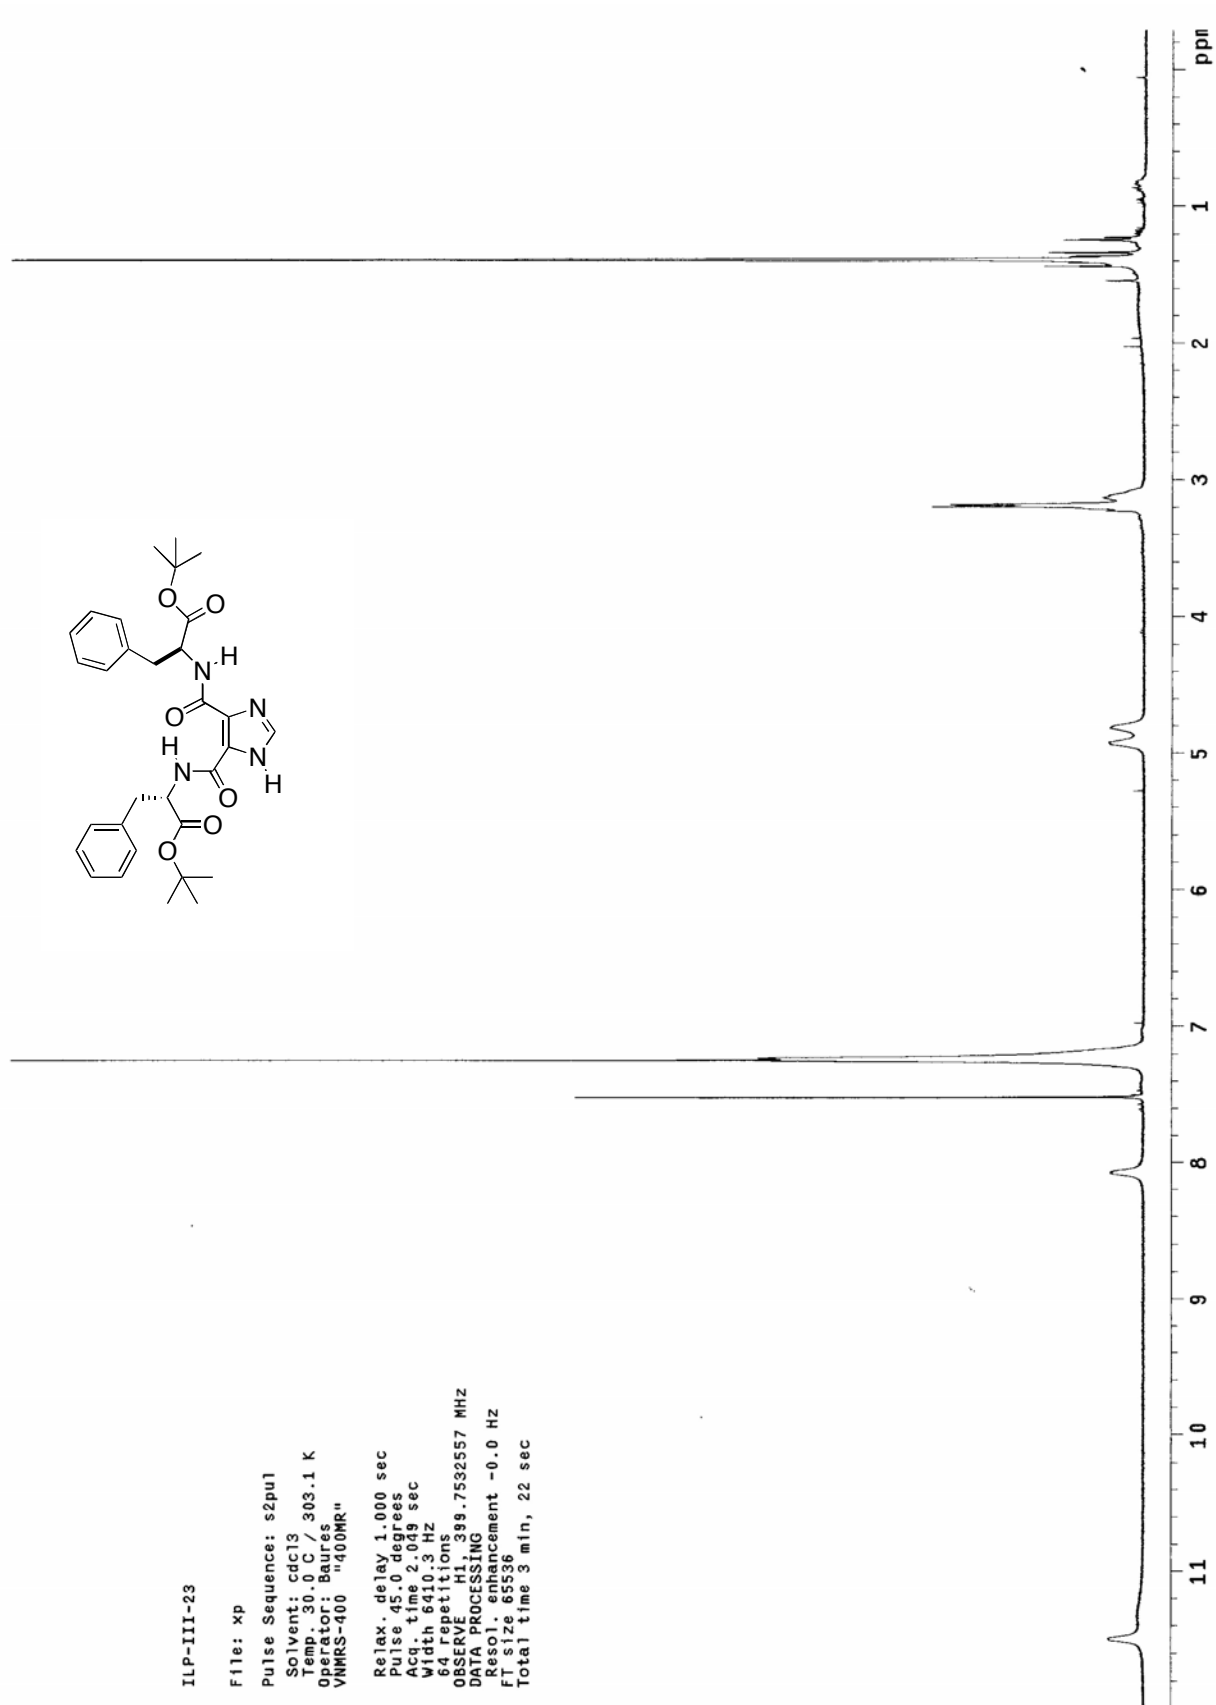

Figure S56. <sup>1</sup>H-NMR for 4{7}.



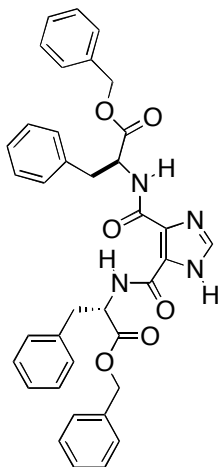

ILP-III-17

File: xp

Pulse Sequence: s2pu1

Solvent: cdcl3

Temp. 30.0 C / 303.1 K

Operator: Baures

VNMRK-400 "400MR"

Relax. delay 1.000 sec

Pulse 45.0 degrees

Acq. time 2.049 sec

Width 6410.3 Hz

64 repetitions

OBSERVE H1, 399.7532555 MHz

DATA PROCESSING

Resol. enhancement -0.0 Hz

FT size 65536

Total time 3 min, 22 sec

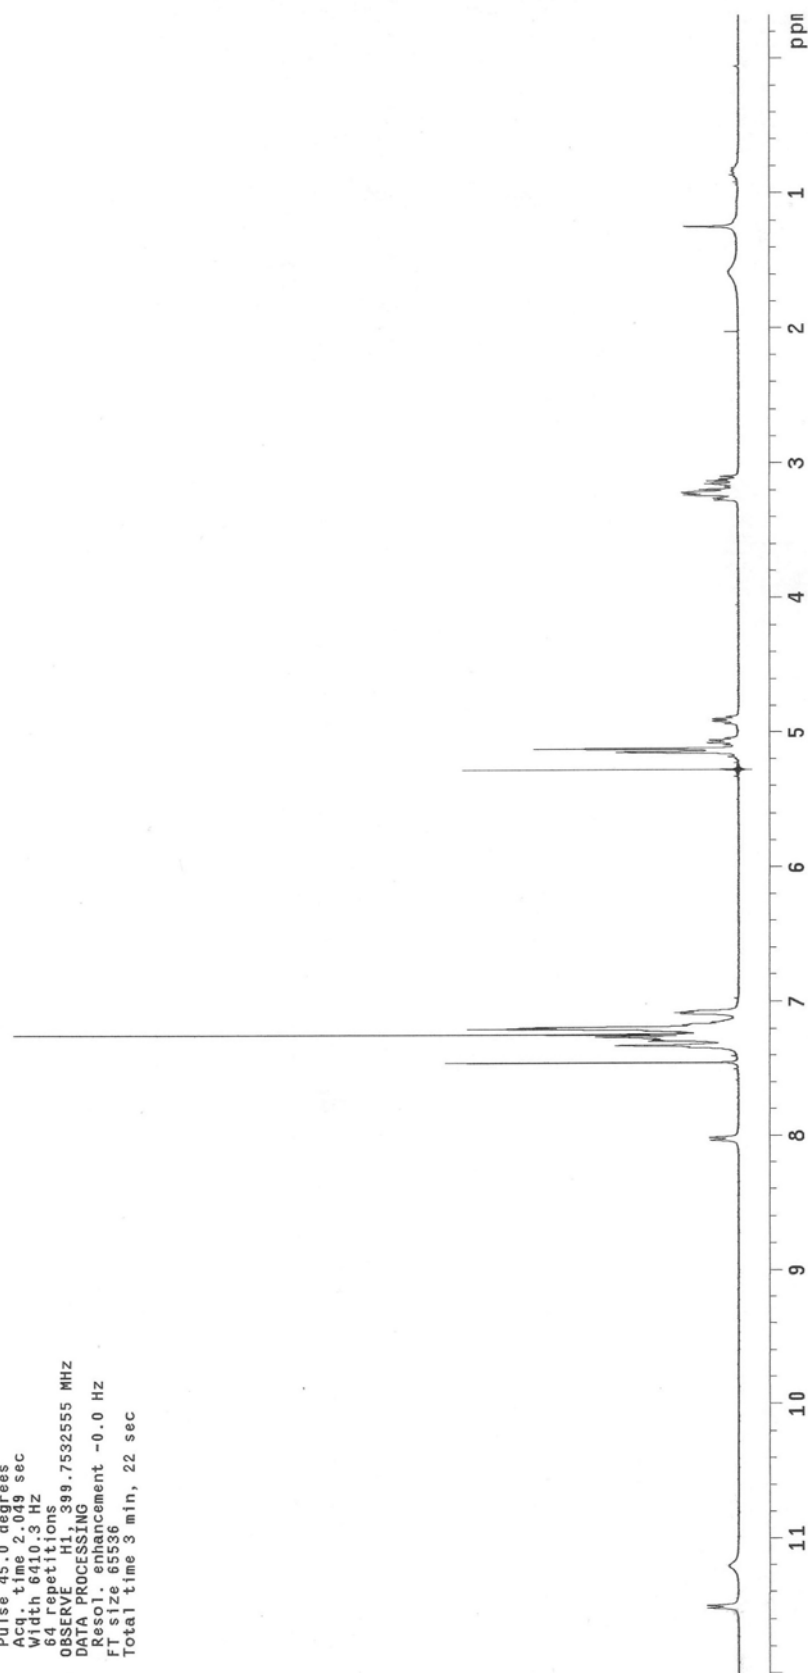

Figure S57. <sup>1</sup>H-NMR for 4{8}.

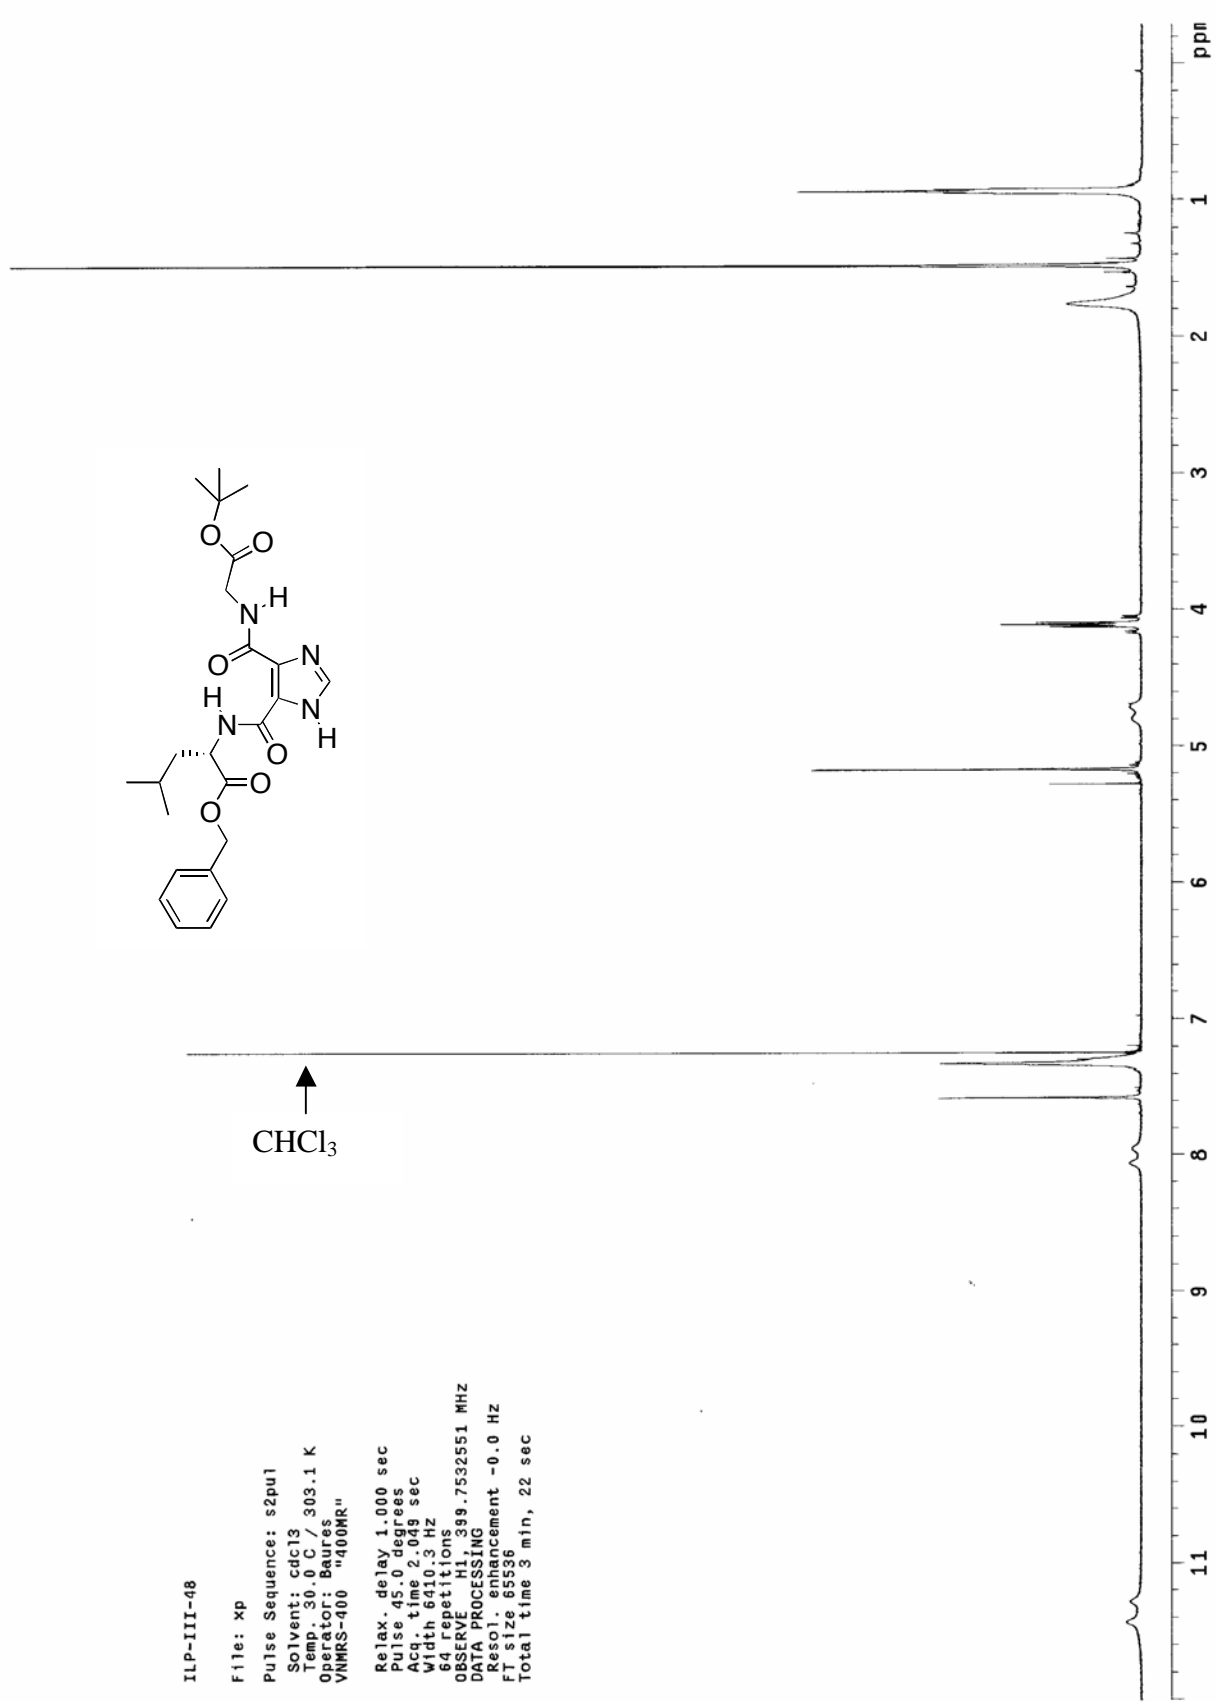

Figure S58. <sup>1</sup>H-NMR for 4{14}.

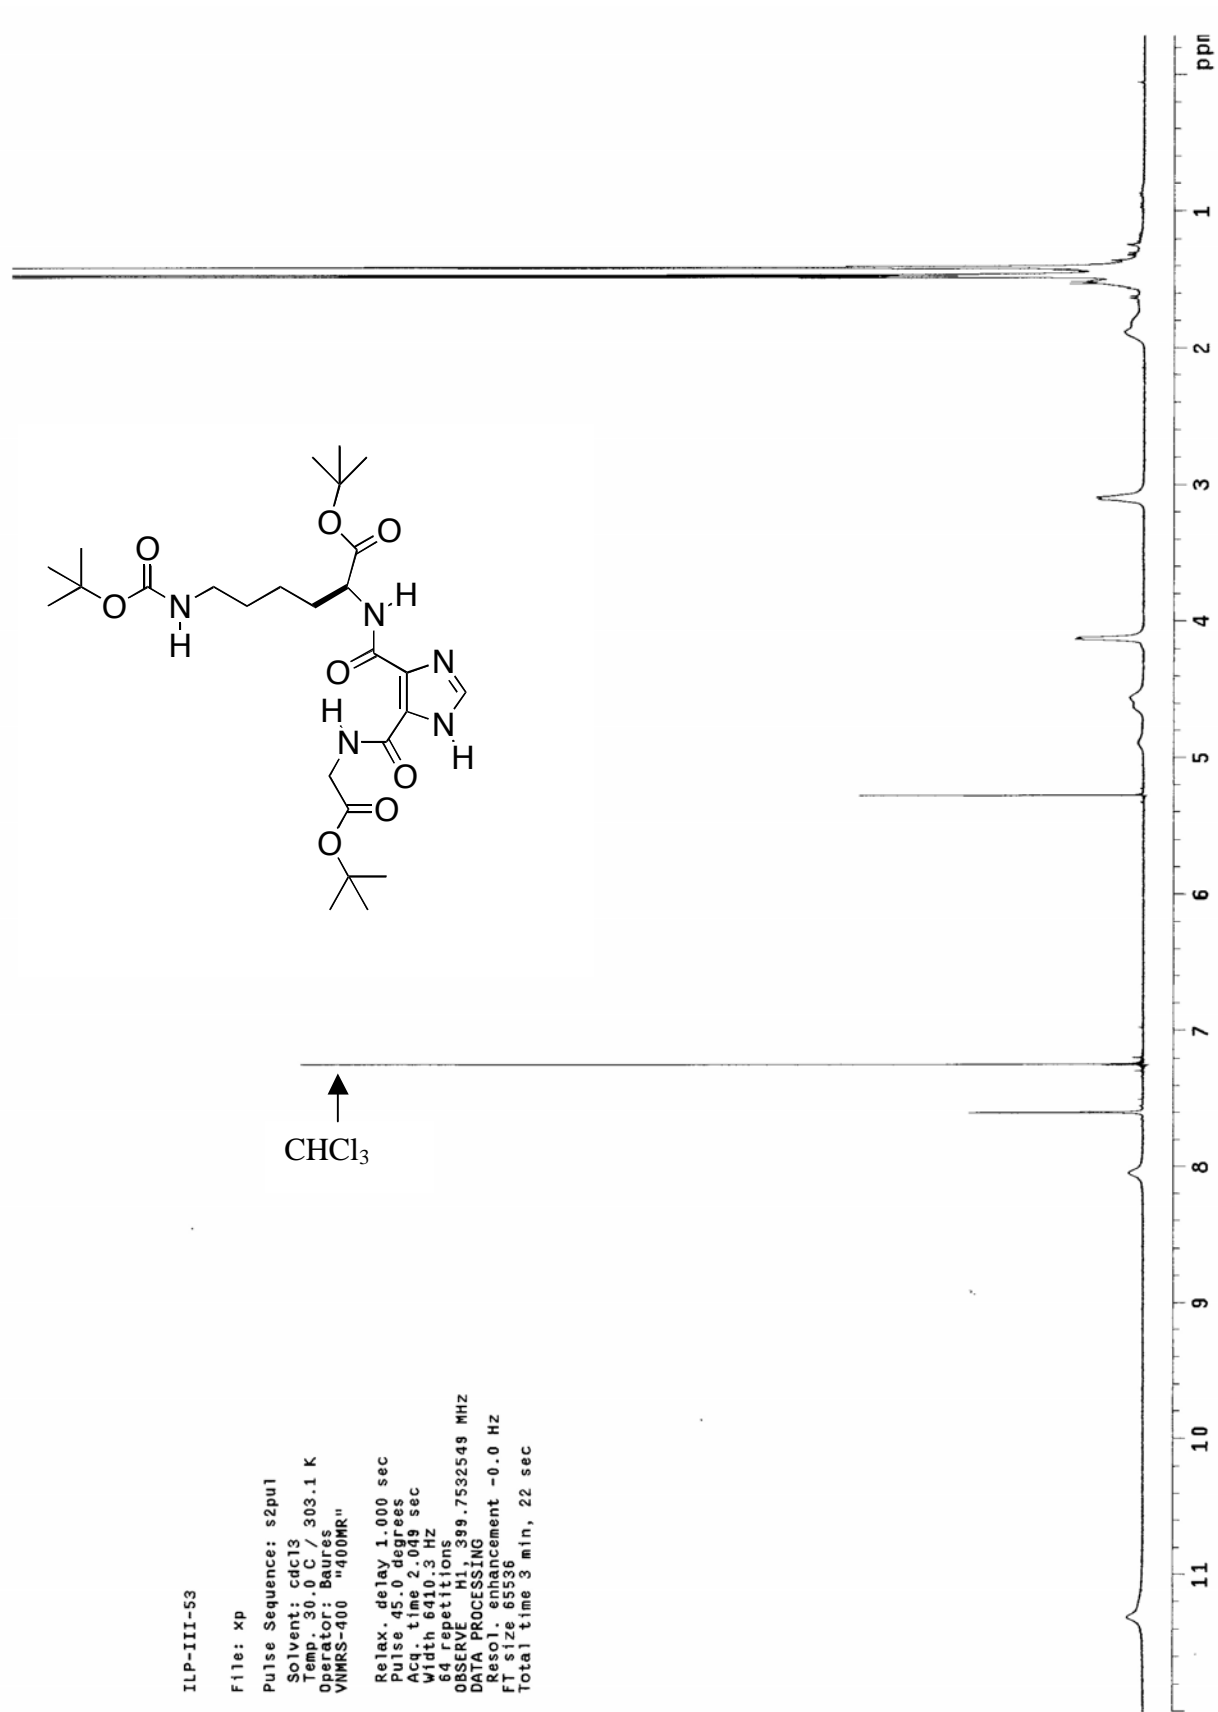

Figure 59. <sup>1</sup>H-NMR for 4{17}.

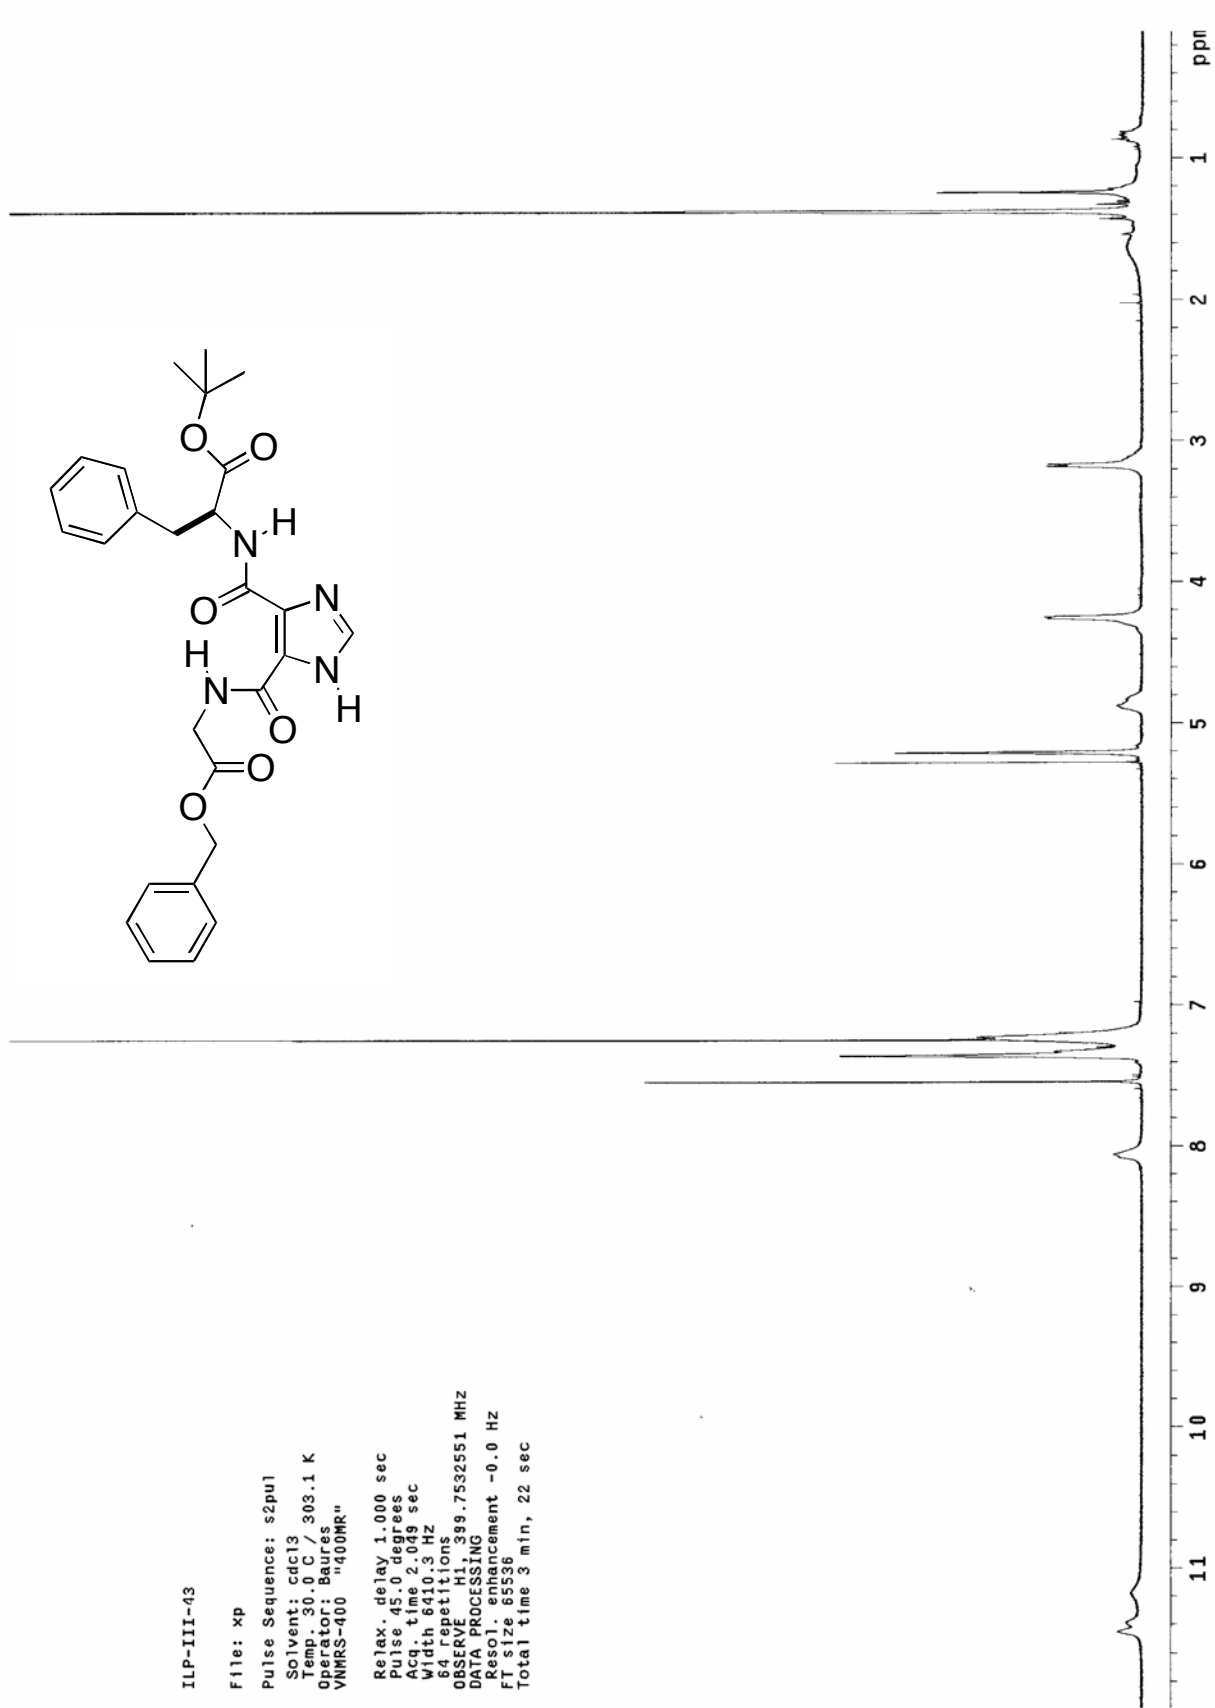

Figure S60.  $^1\text{H-NMR}$  for 4{22}.

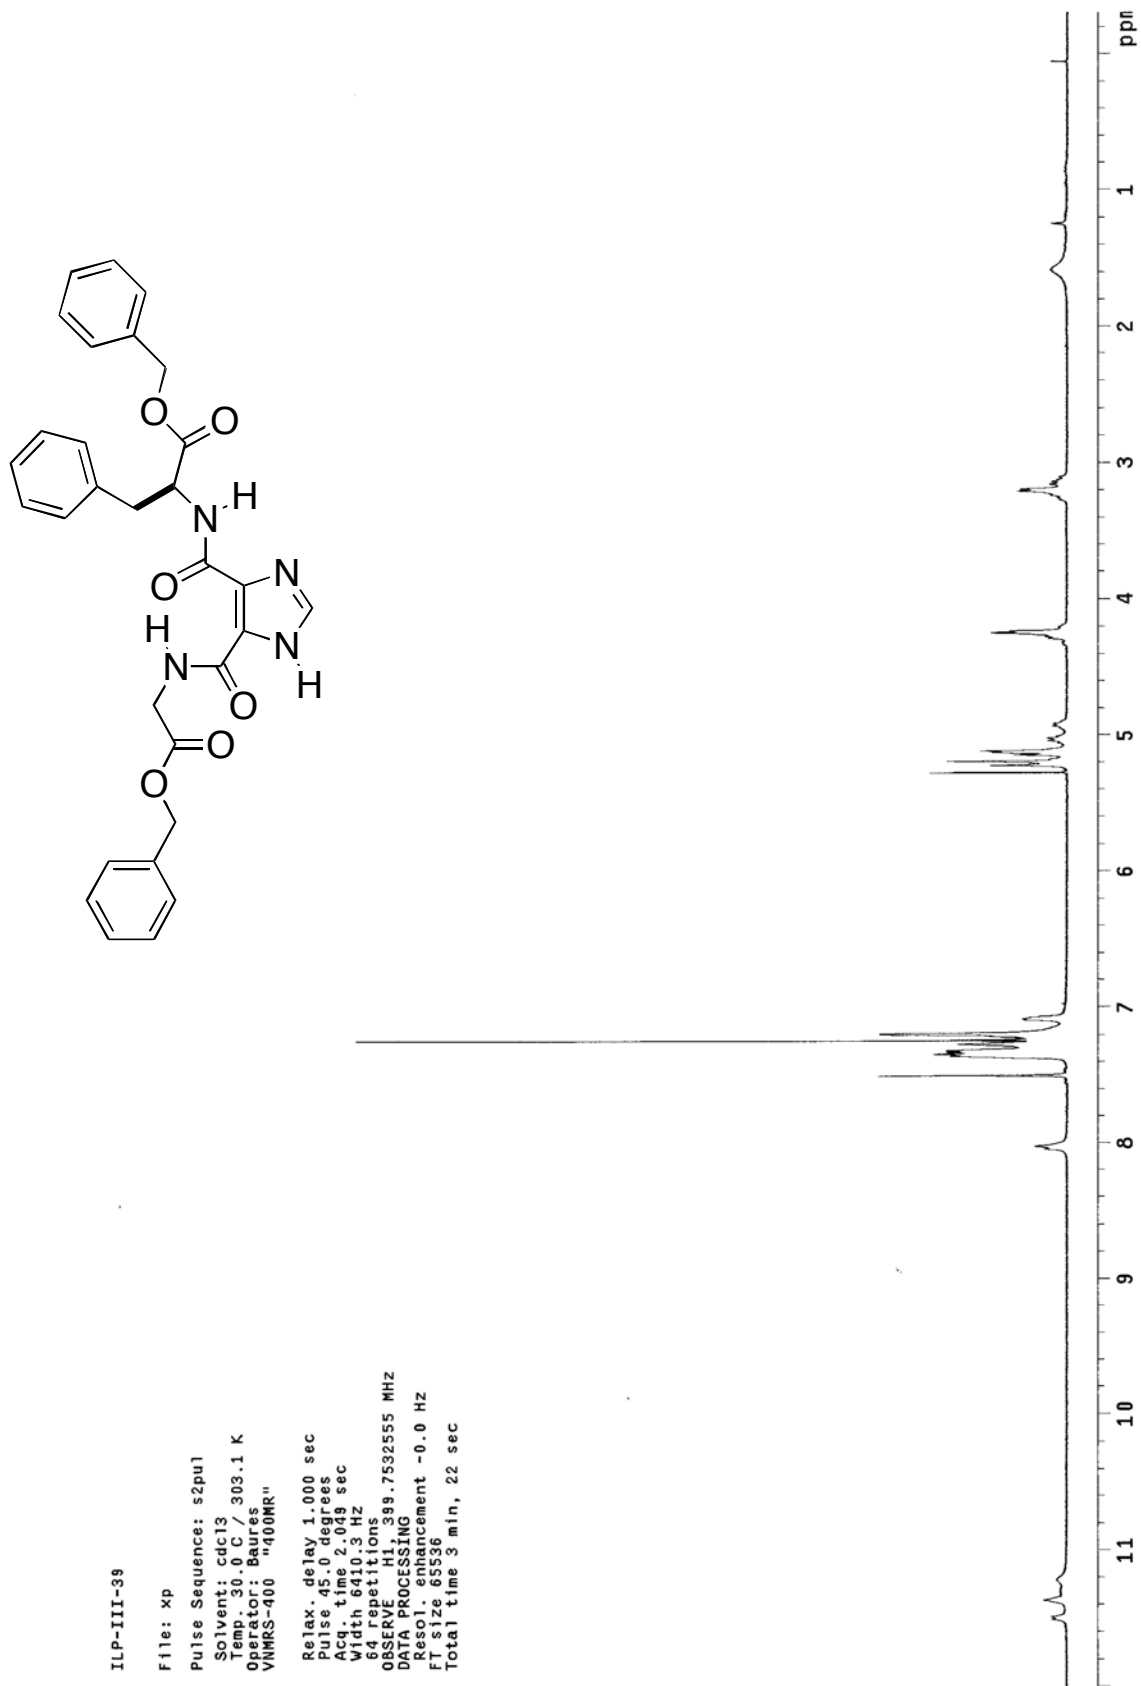

Figure S61.  $^1\text{H-NMR}$  for 4{23}.

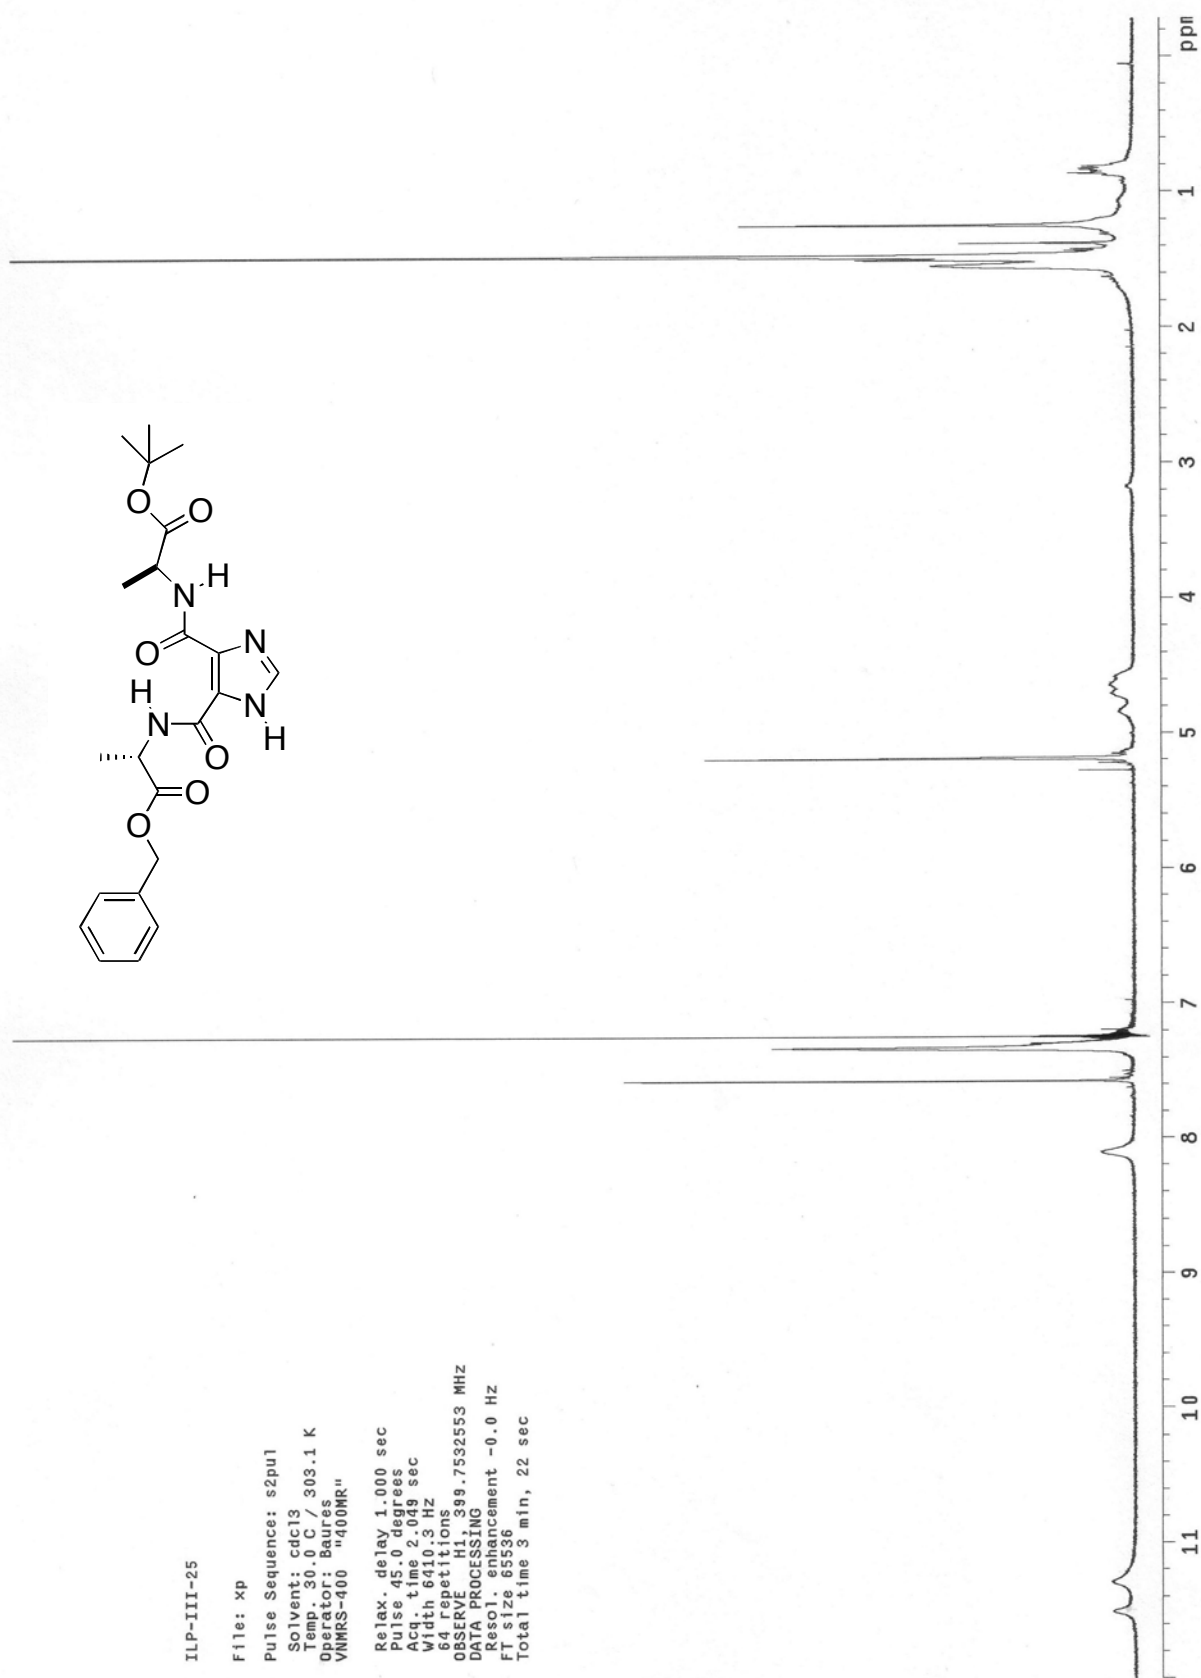

Figure S62. <sup>1</sup>H-NMR for 4{25}.

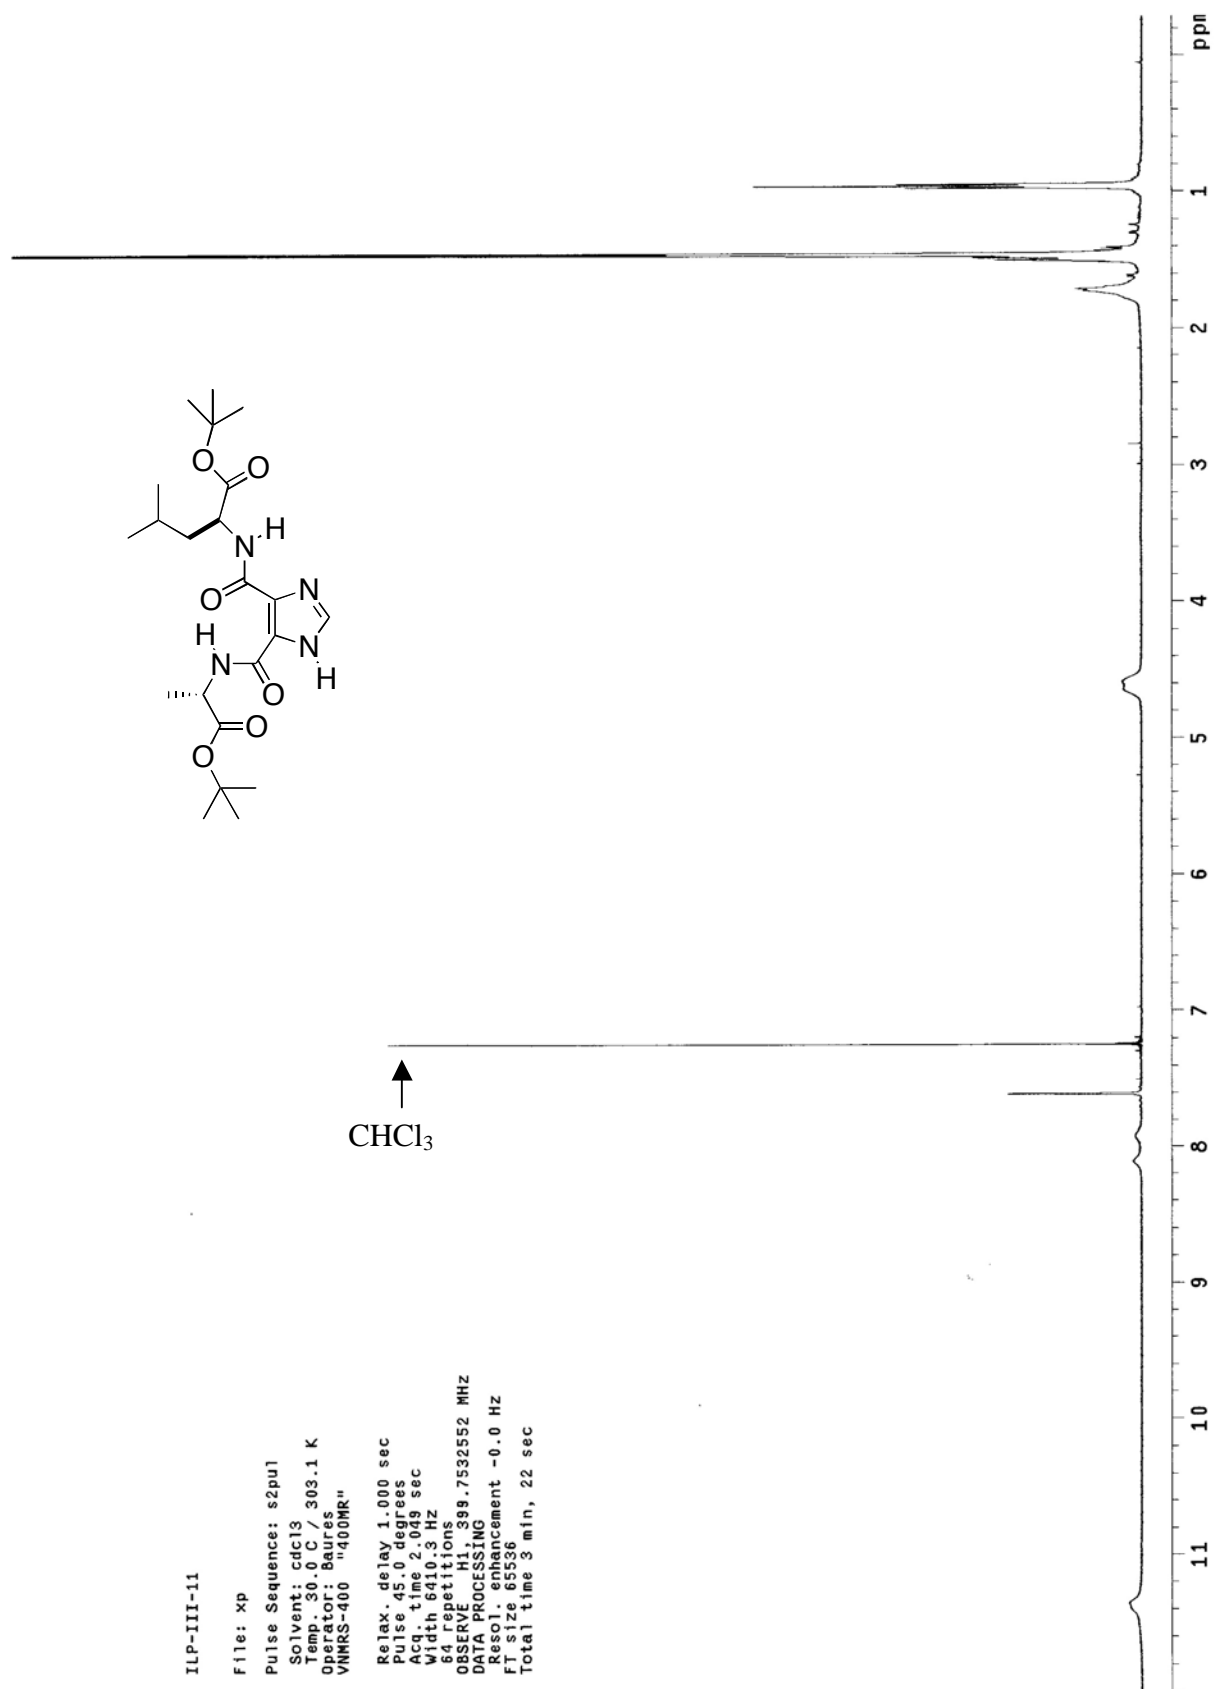

Figure S63. <sup>1</sup>H-NMR for 4{26}.

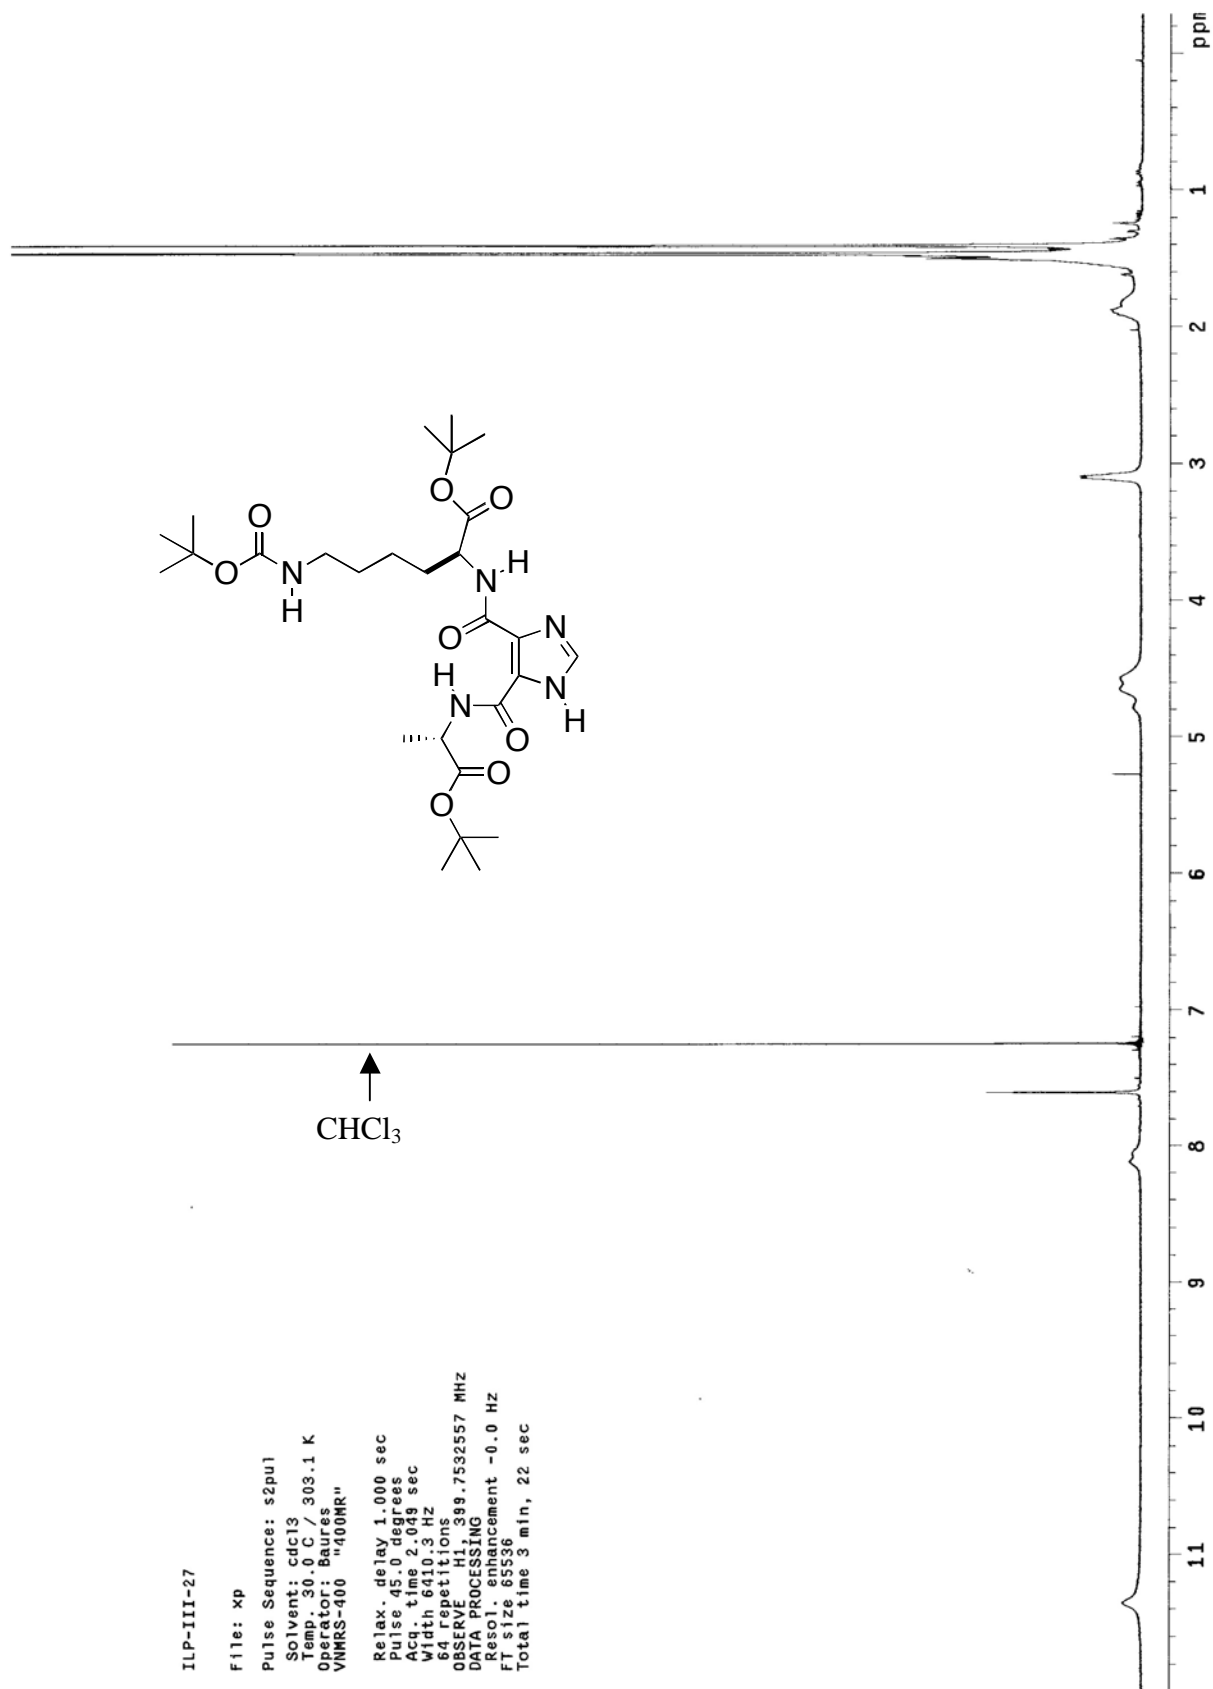

Figure S64. <sup>1</sup>H-NMR for 4{30}.



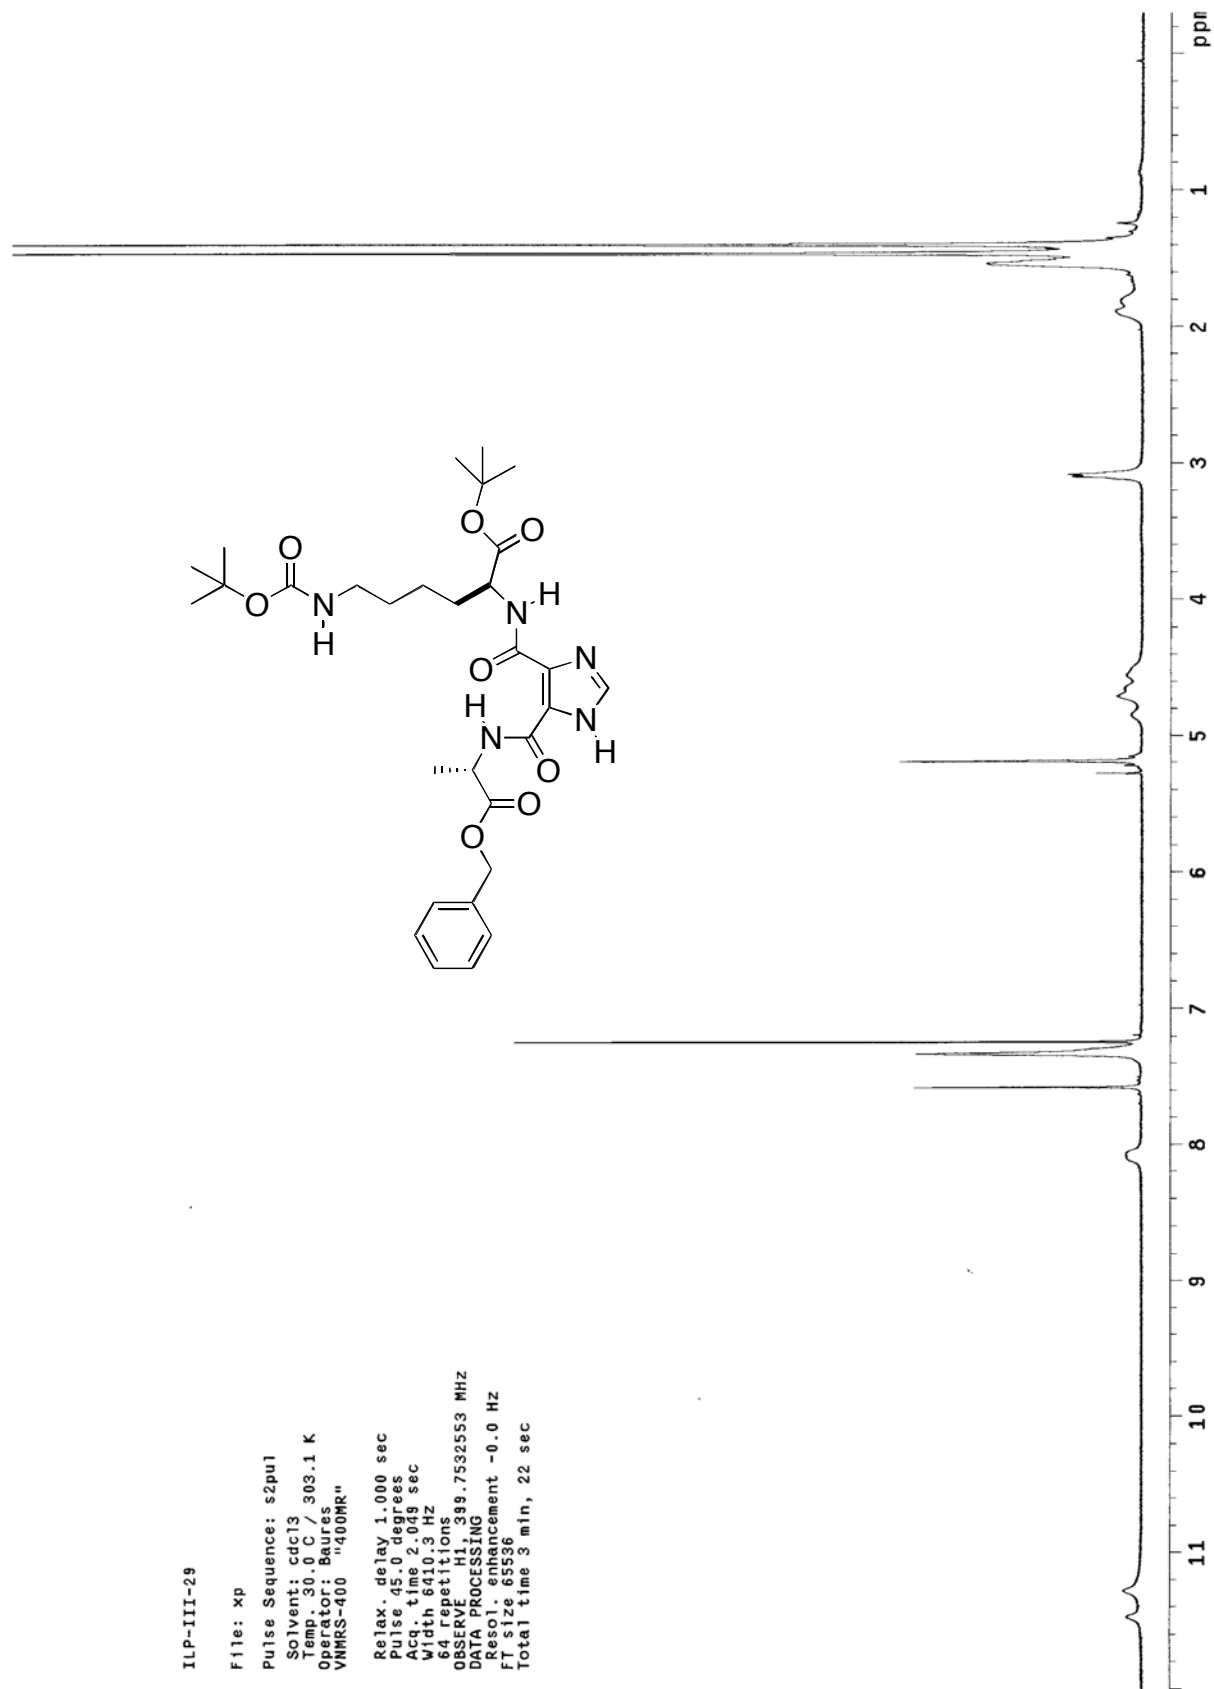

Figure S65.  $^1\text{H-NMR}$  for 4{35}.



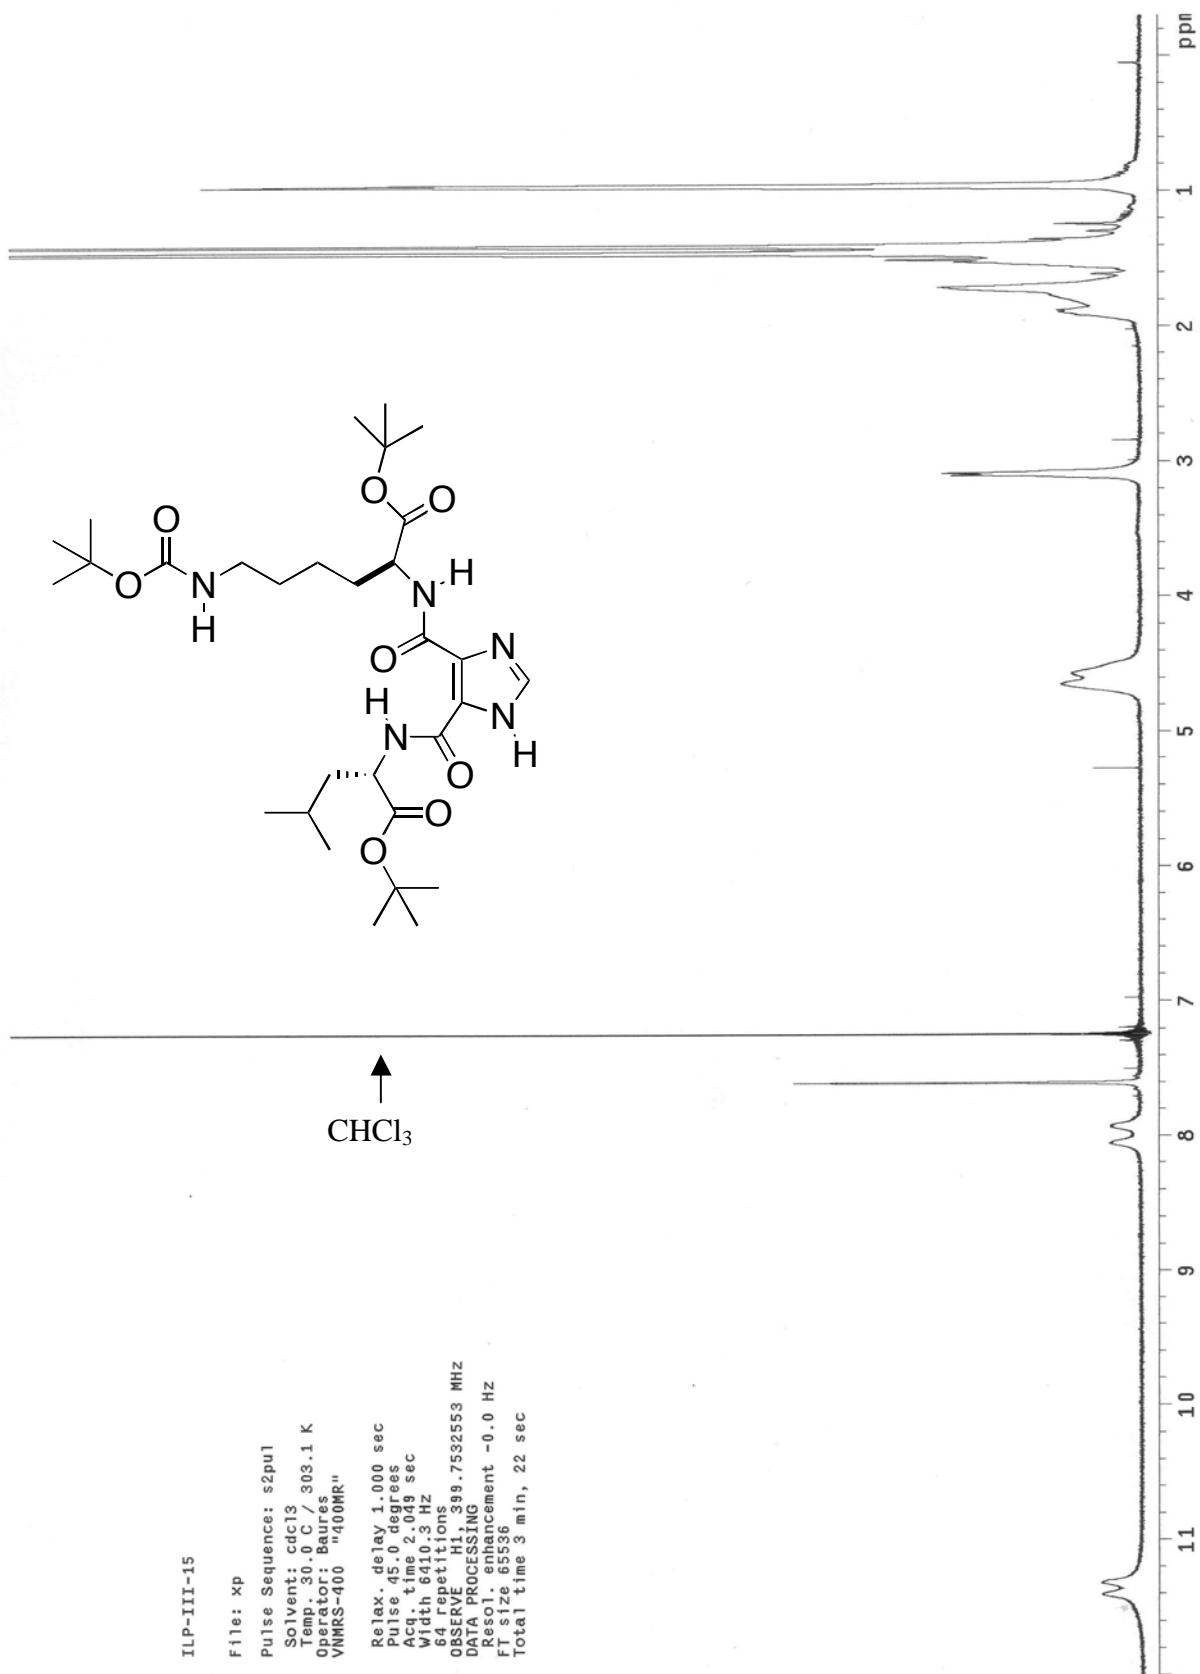

Figure S67. <sup>1</sup>H-NMR for 4{39}.

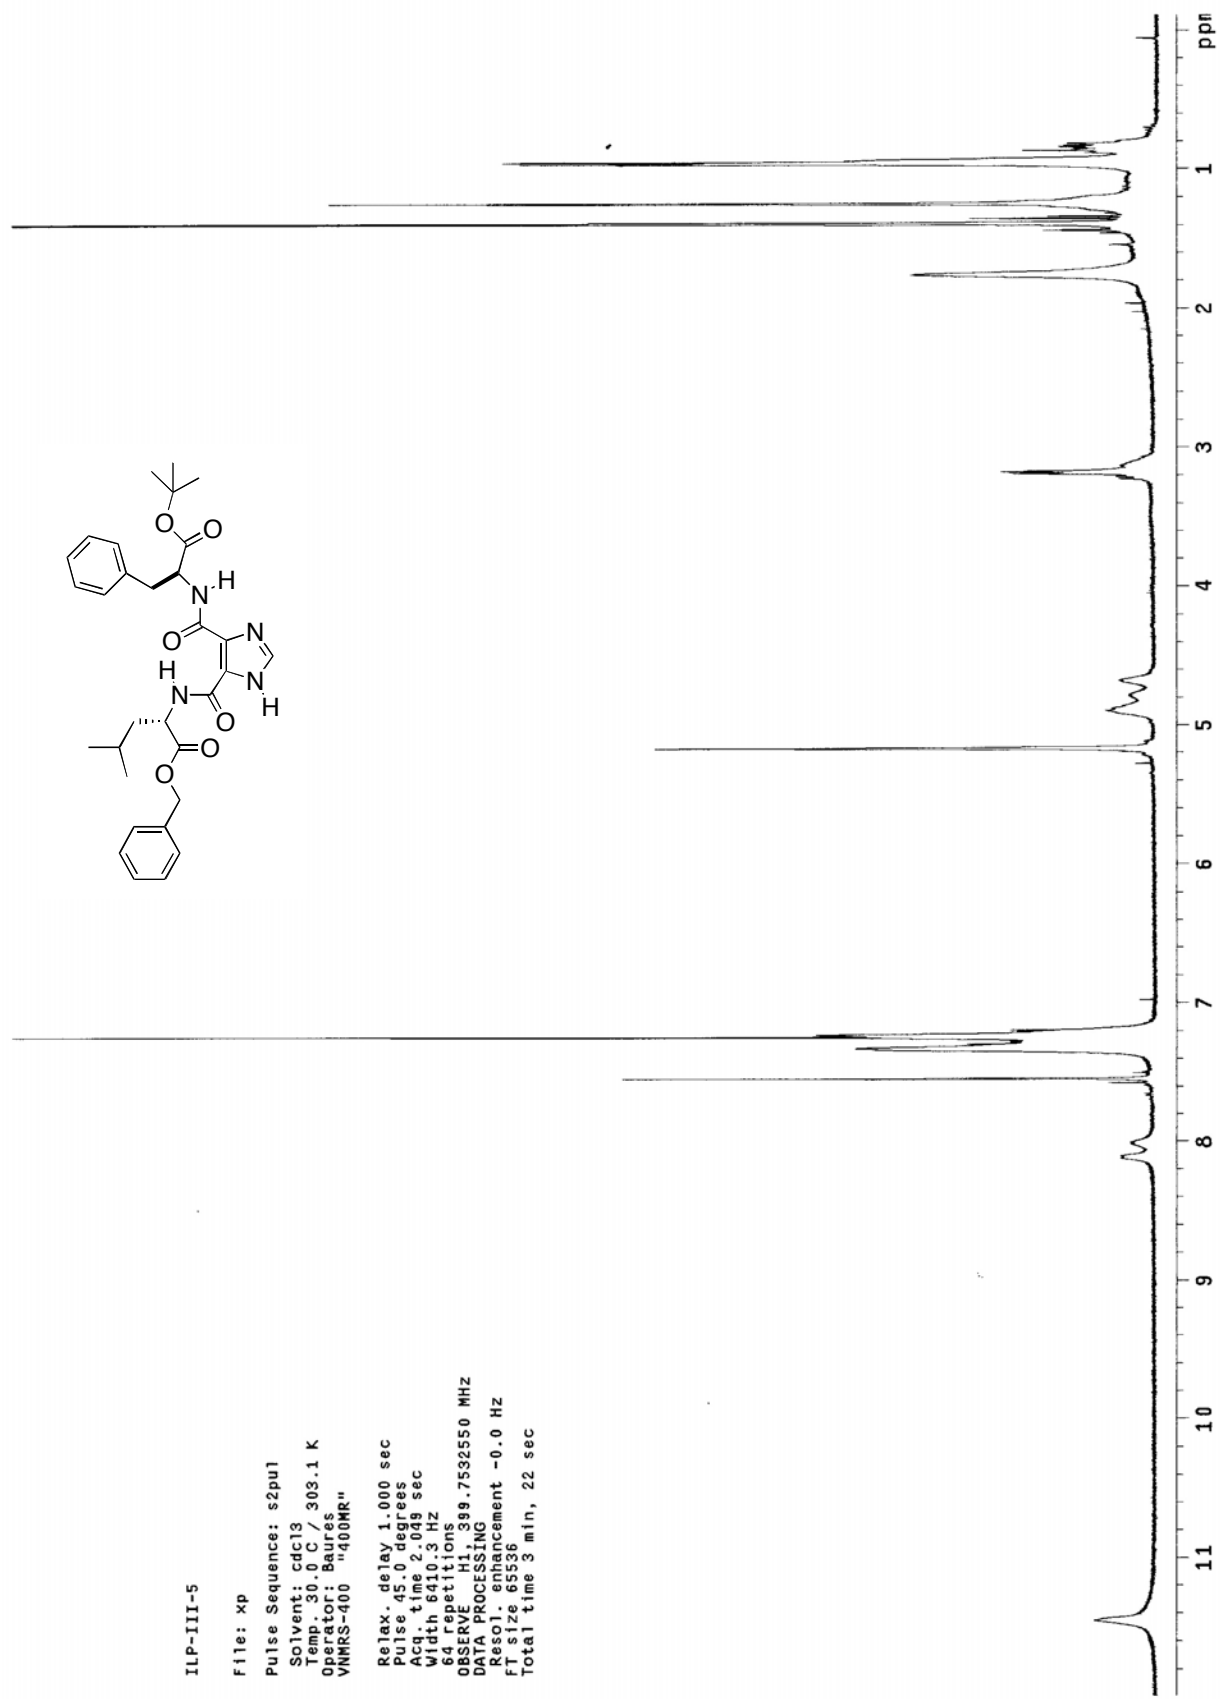

Figure S68.  $^1\text{H-NMR}$  for 4{40}.





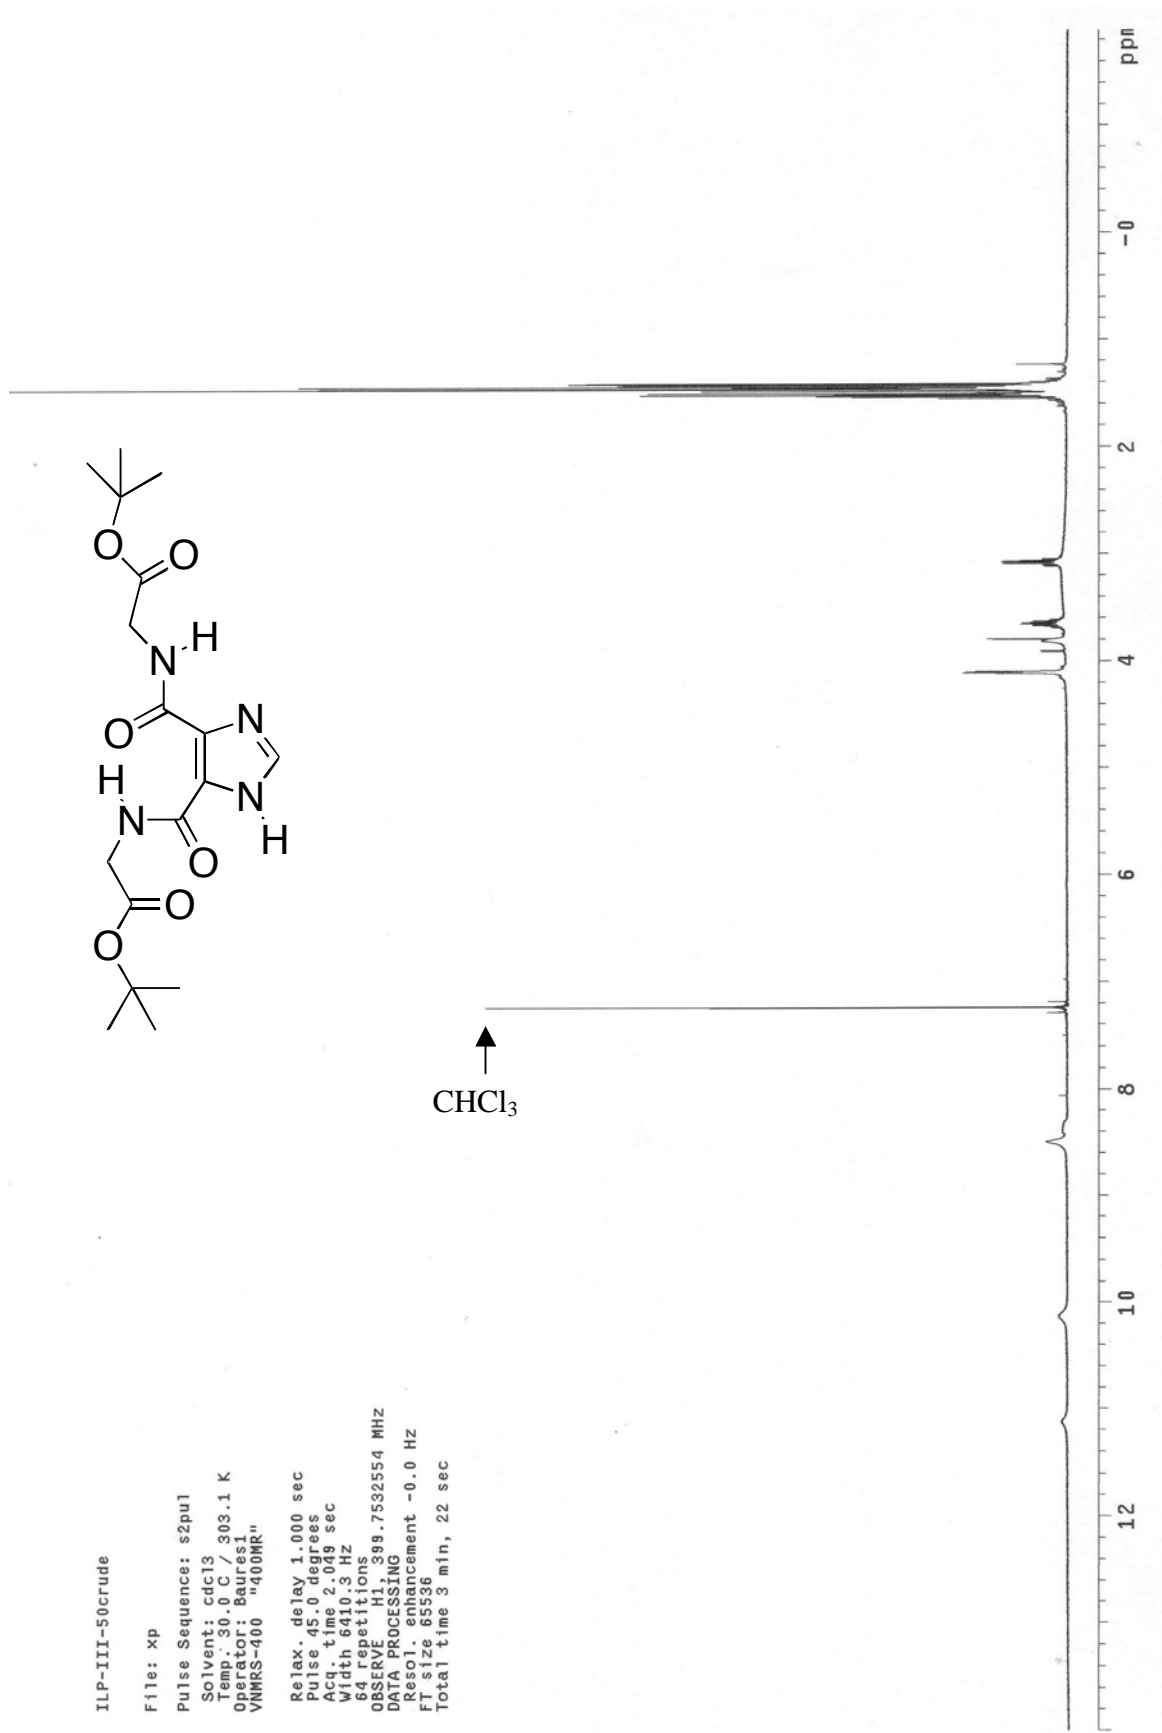

Figure S71. <sup>1</sup>H-NMR for the crude reaction to yield 4{1}.

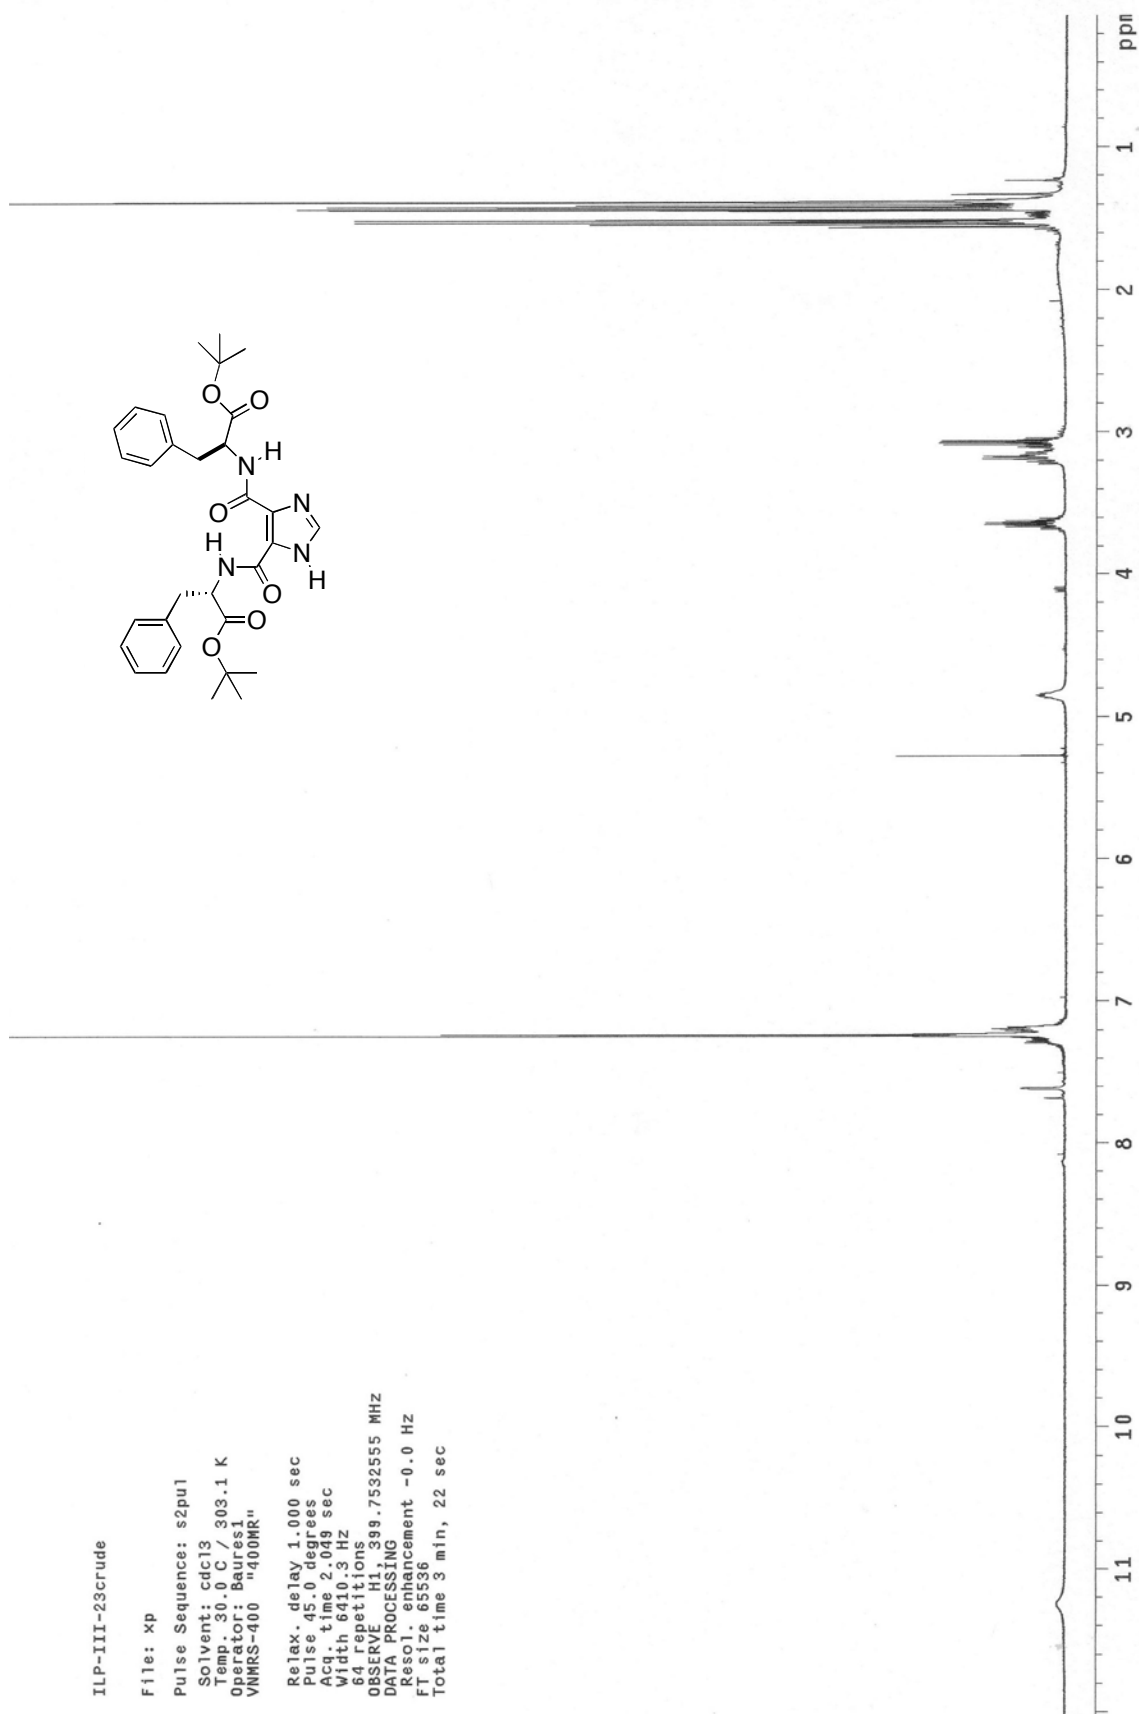

**Figure S72.** <sup>1</sup>H-NMR for the crude reaction to yield **4{7}**.



ILP-III-17crude

File: xp

Pulse Sequence: s2pu1

Solvent: cdcl3  
Temp. 30.0 C / 303.1 K  
Operator: Baures1  
VNMR-400 "400MR"

Relax. delay 1.000 sec  
Pulse 45.0 degrees  
Acq. time 2.049 sec  
Width 6410.3 Hz  
64 repetitions  
OBSERVE H1, 399.7532553 MHz  
DATA PROCESSING  
Resol. enhancement -0.0 Hz  
F1 size 65536  
Total time 3 min, 22 sec

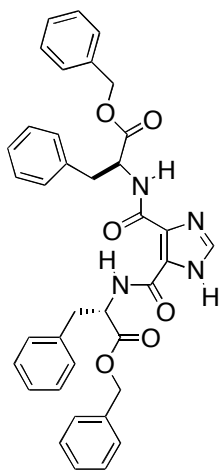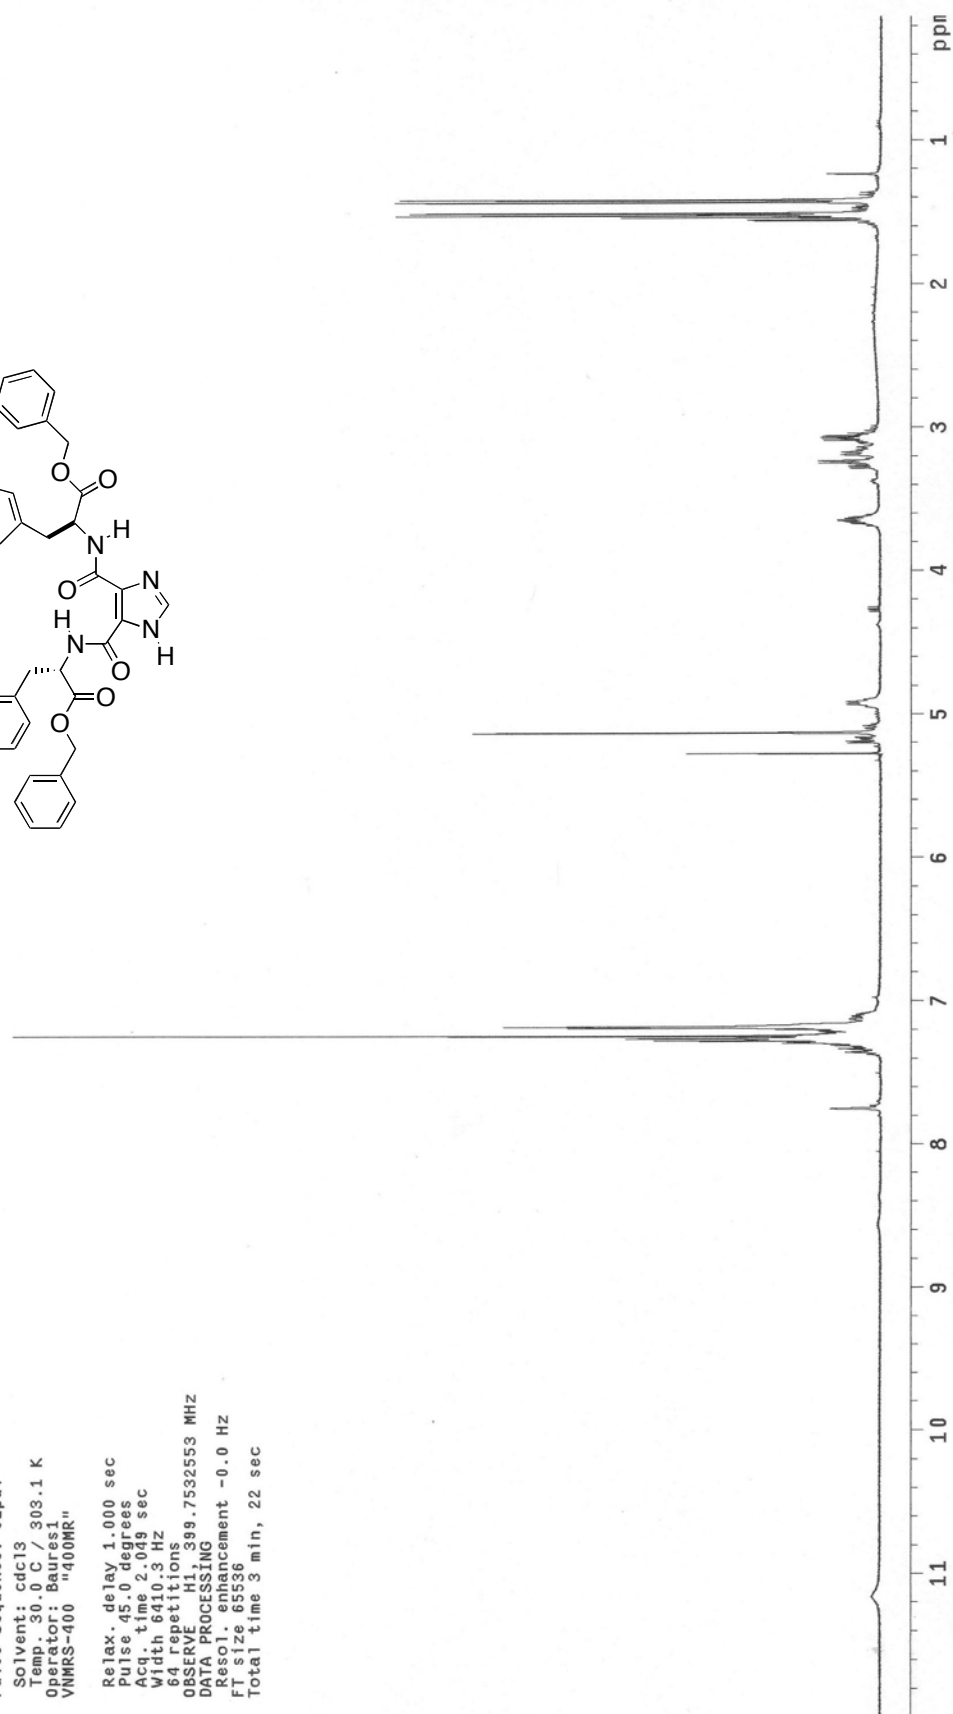

Figure S73. <sup>1</sup>H-NMR for the crude reaction to yield 4{8}.

ILP-III-47crude

File: xp

Pulse Sequence: s2pu1

Solvent: cdCl3

Temp. 30.0 C / 303.1 K

Operator: Baures1

VNMR5-400

"400MR"

Relax. delay 1.000 sec

Pulse 45.0 degrees

Acq. time 2.049 sec

Width 6410.3 Hz

64 repetitions

OBSERVE H1, 399.7532553 MHz

DATA PROCESSING

Resol. enhancement -0.0 Hz

FT size 65536

Total time 3 min, 22 sec

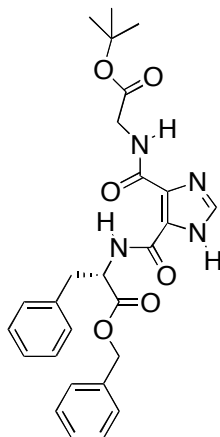

CHCl<sub>3</sub>

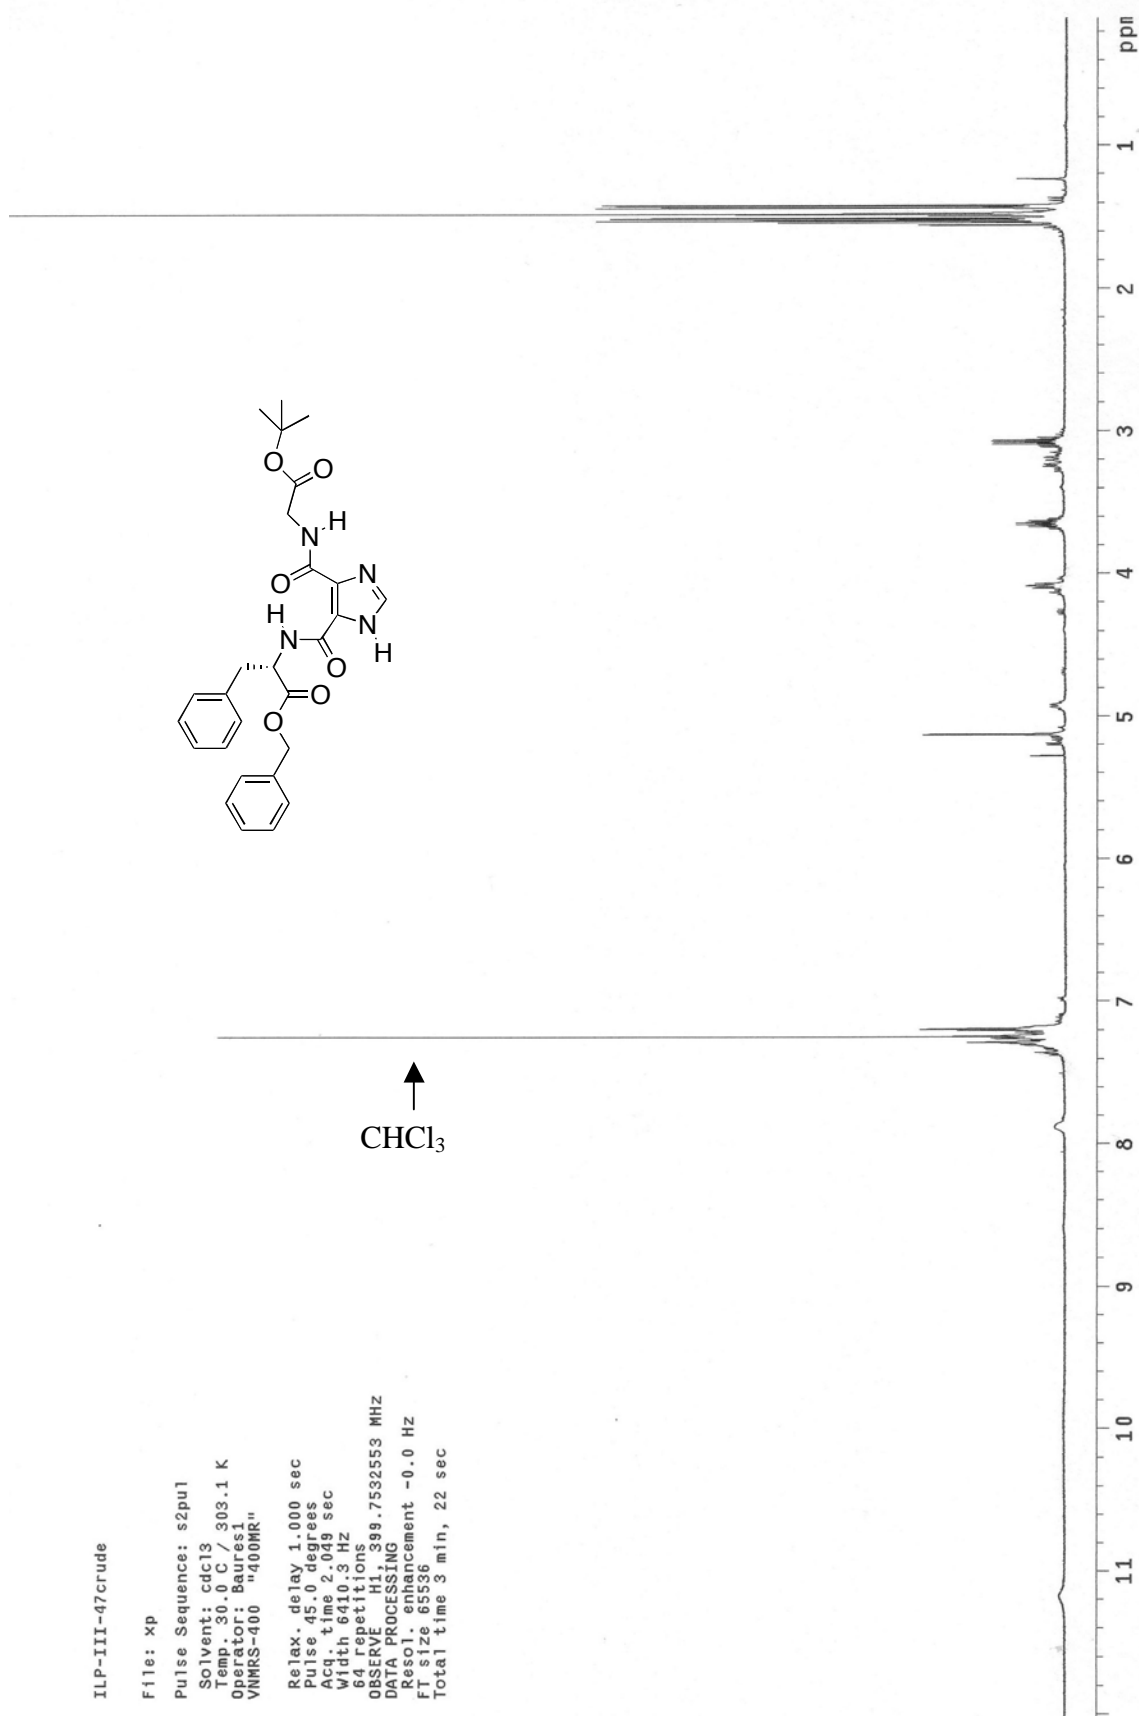

Figure S74. <sup>1</sup>H-NMR for the crude reaction to yield 4{16}.

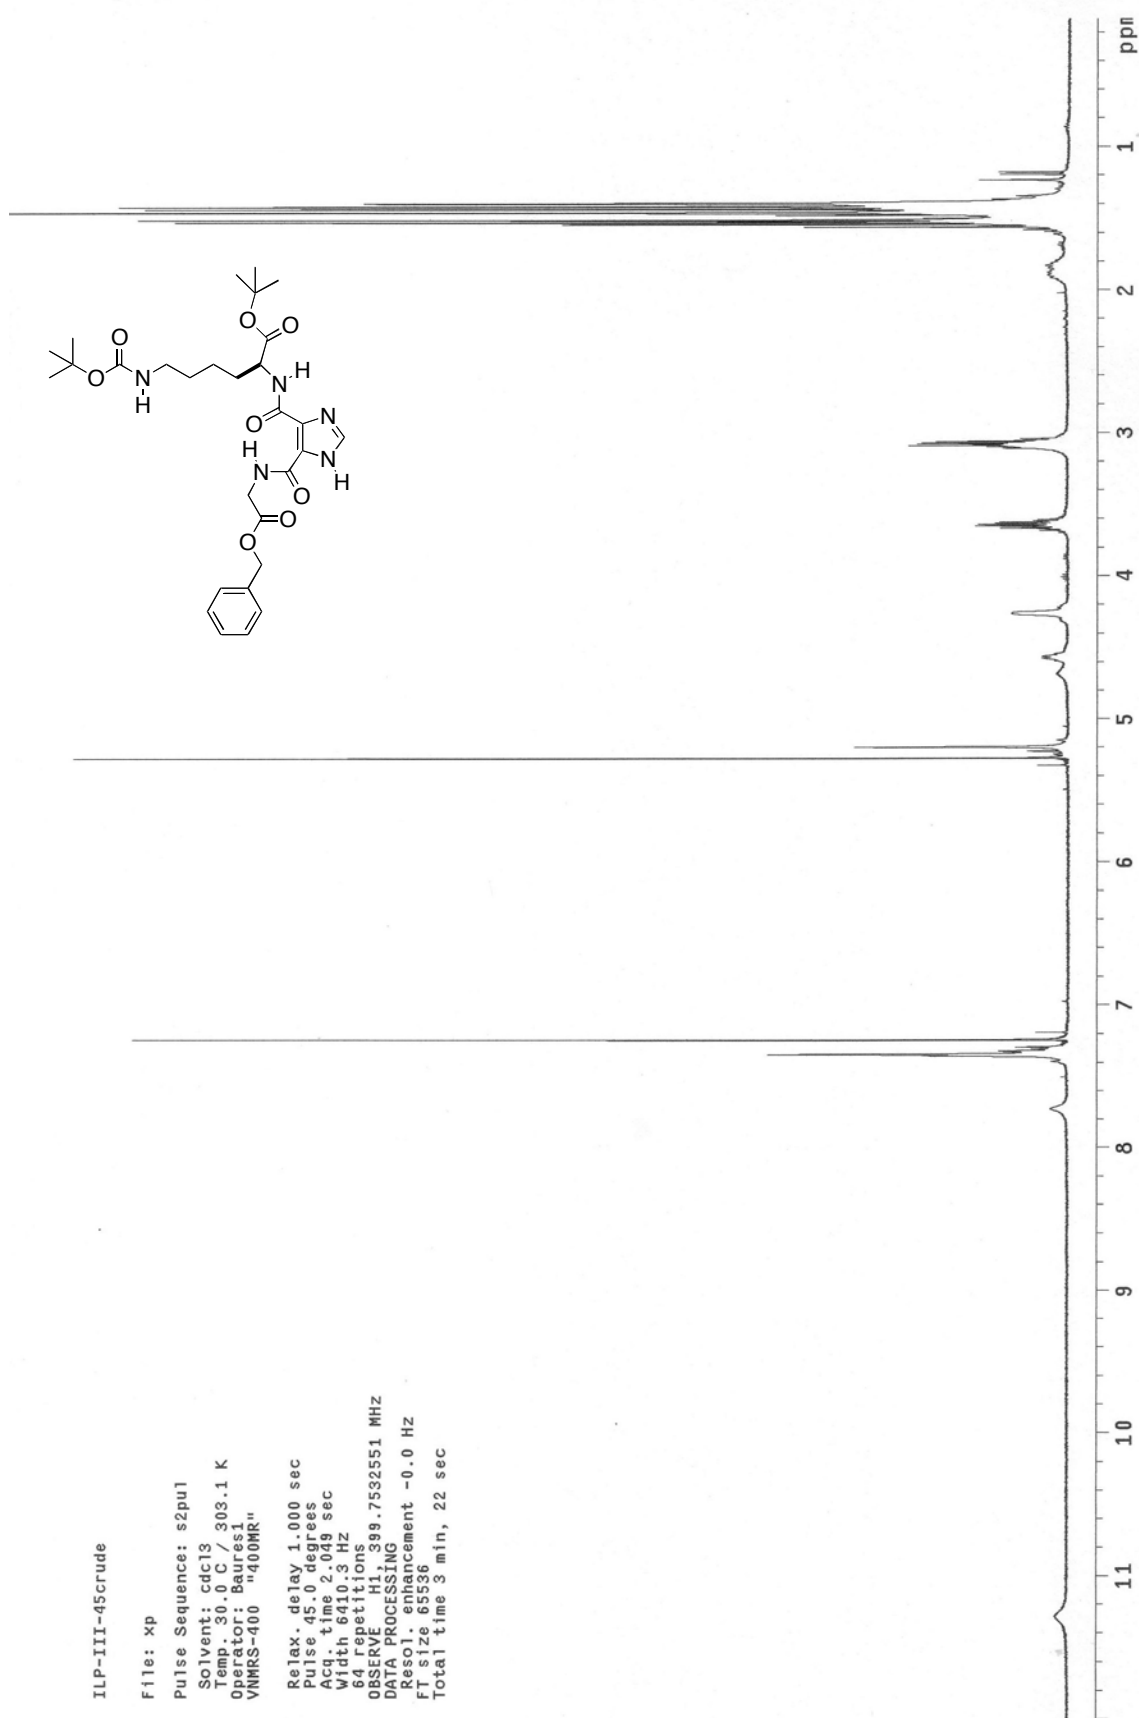

**Figure S75.**  $^1\text{H-NMR}$  for the crude reaction to yield **4{24}**.

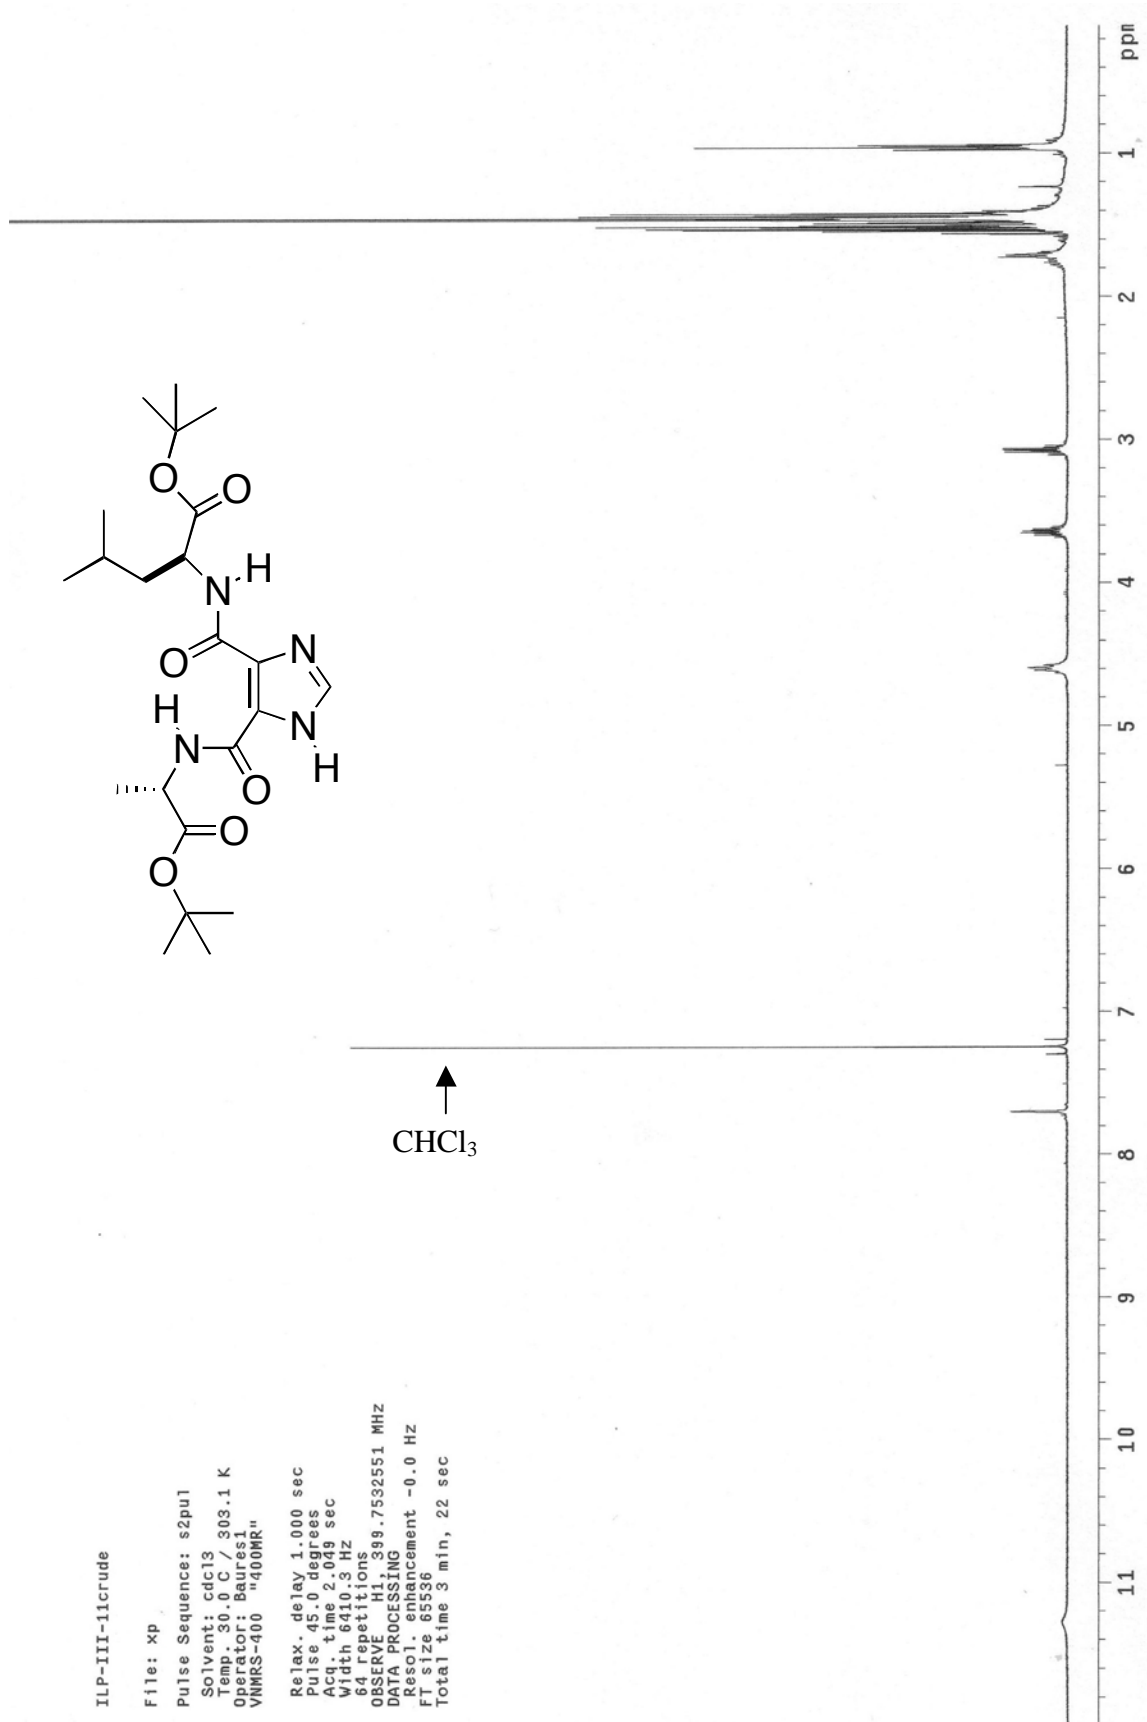

**Figure S76.**  $^1\text{H-NMR}$  for the crude reaction to yield **4{26}**.

ILP-III-27crude

File: xp

Pulse Sequence: s2pul

Solvent: cdc13

Temp. 30.0 C / 303.1 K

Operator: Baures1

VNMR5-400 "400MR"

Relax. delay 1.000 sec

Pulse 45.0 degrees

Acq. time 2.049 sec

Width 6410.3 Hz

64 repetitions

OBSERVE H1, 399.7532545 MHz

DATA PROCESSING

Resol. enhancement -0.0 Hz

FT size 65536

Total time 3 min, 22 sec

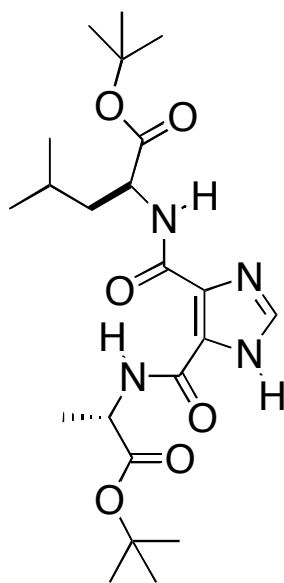

↑  
CHCl<sub>3</sub>

Figure S77. <sup>1</sup>H-NMR for the crude reaction to yield 4{30}.

ILP-III-1crude

File: xp

Pulse Sequence: s2pul

Solvent: cdc13

Temp. 30.0 C / 303.1 K

Operator: Baures1

VNMR5-400 "400MR"

Relax. delay 1.000 sec

Pulse 45.0 degrees

Acq. time 2.049 sec

Width 6410.3 Hz

64 repetitions

OBSERVE H1, 399.7532548 MHz

DATA PROCESSING

Resol. enhancement -0.0 Hz

FT size 65536

Total time 3 min, 22 sec

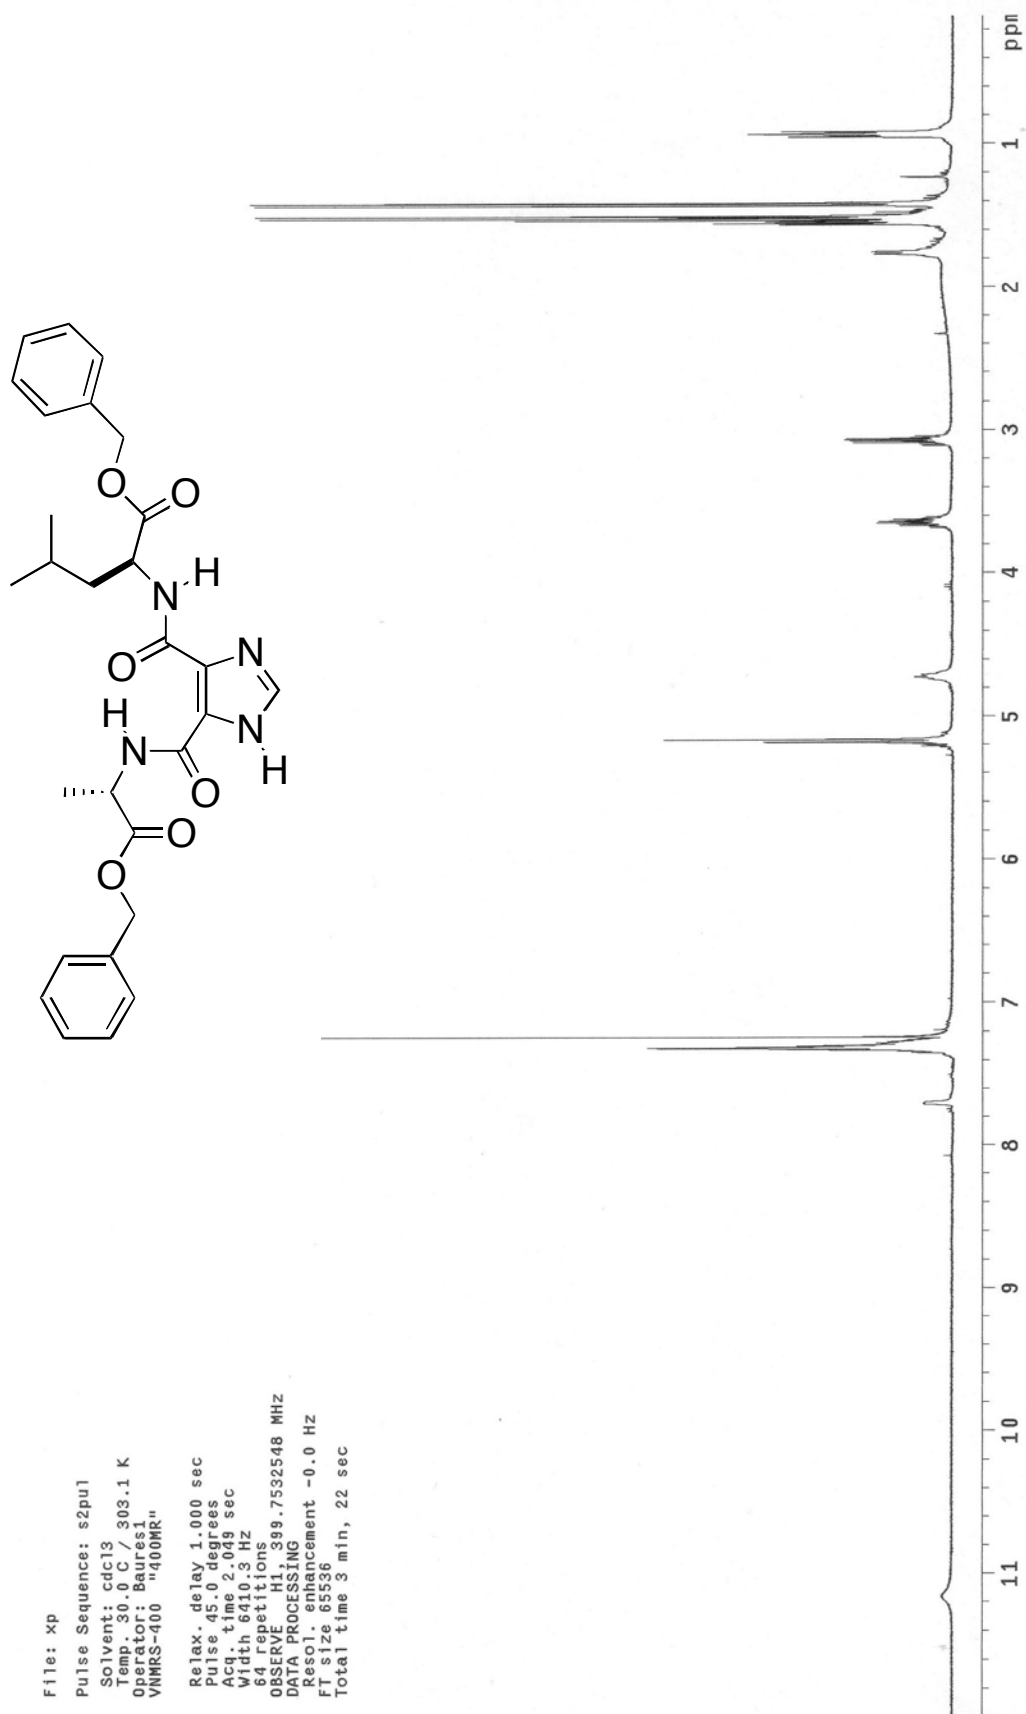

Figure S78. <sup>1</sup>H-NMR for the crude reaction to yield 4{32}.



IILP-III-5crude

File: xp

Pulse Sequence: s2pul

Solvent: cdc13

Temp. 30.0 C / 303.1 K

Operator: Baures1

VMRS-400 "400MR"

Relax. delay 1.000 sec

Pulse 45.0 degrees

Acq. time 2.049 sec

Width 6410.3 Hz

64 repetitions

OBSERVE H1, 398.7532554 MHz

DATA PROCESSING

Resol. enhancement -0.0 Hz

FT size 65536

Total time 3 min, 22 sec

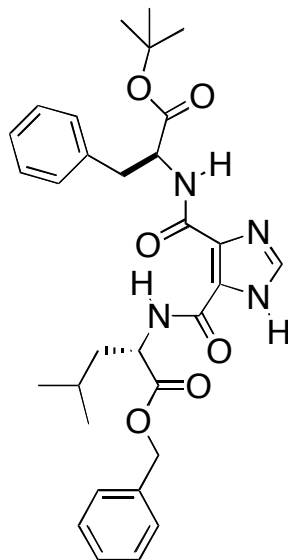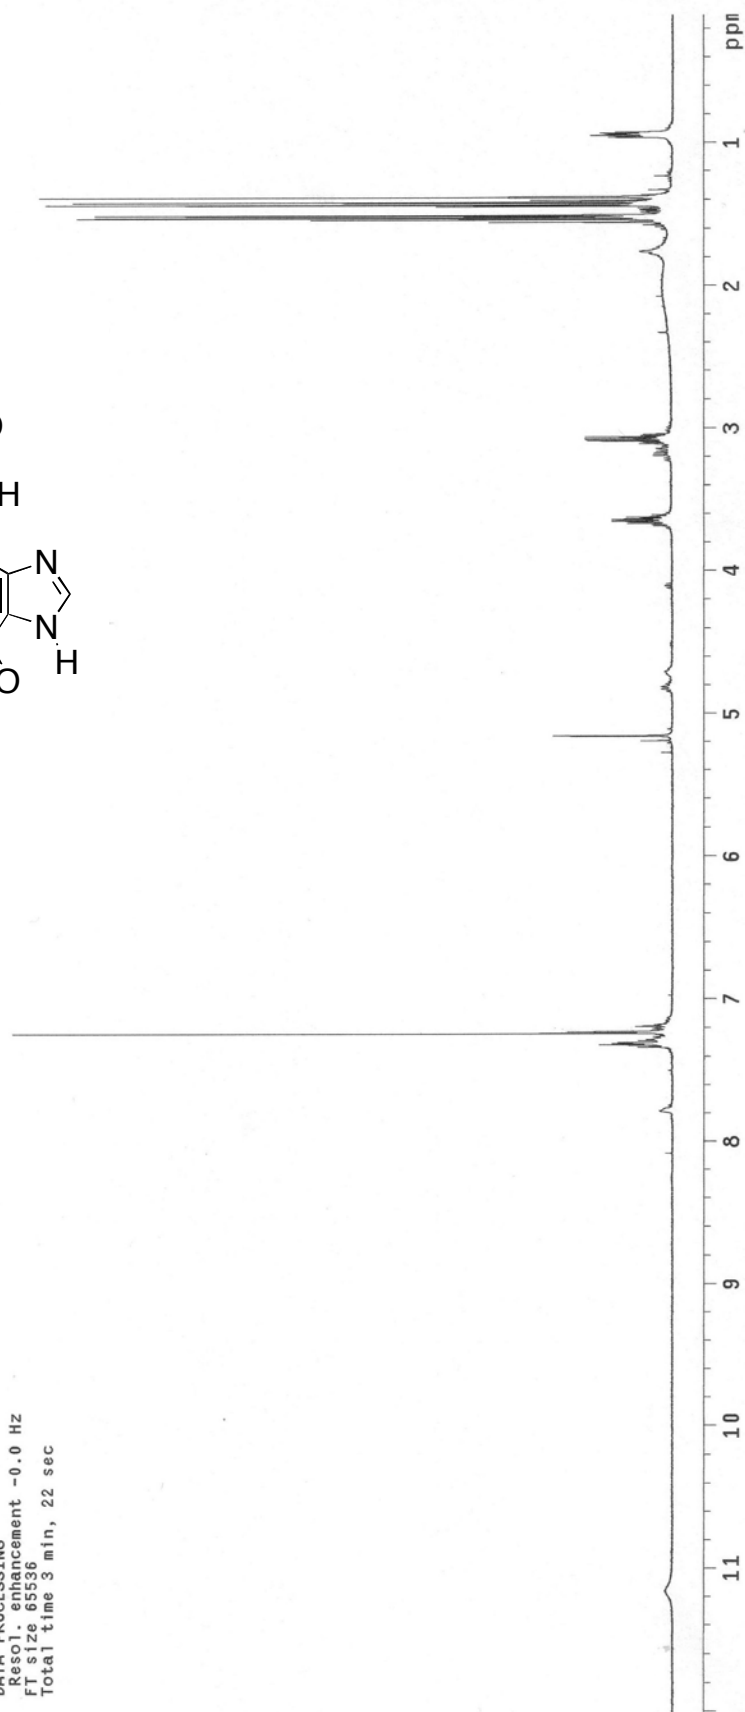

Figure S80. <sup>1</sup>H-NMR for the crude reaction to yield 4{40}.
